# Supplementary material for: Acid-mediated intermolecular C–F/C–H cross-coupling of 2-fluorobenzofurans with arenes: synthesis of 2-arylbenzofurans
Source: Royal Society of Chemistry journal article supplement (doi:10.1039/d1cc03453g), 2021-01-01
Supplement: d1cc03453g1.pdf [file d1cc03453g1.pdf]

# Acid-Mediated Intermolecular C–F/C–H Cross-Coupling of 2-Fluorobenzofurans with Arenes: Synthesis of 2-Arylbenzofurans

Takeshi Fujita,\* Ryutaro Morioka, Takuya Fukuda, Naoto Suzuki, and Junji Ichikawa\*

*Division of Chemistry, Faculty of Pure and Applied Sciences, University of Tsukuba  
Tsukuba, Ibaraki 305-8571, Japan  
fujita@chem.tsukuba.ac.jp  
junji@chem.tsukuba.ac.jp*

## *Supporting Information*

### Table of Contents

|                                                                          |     |
|--------------------------------------------------------------------------|-----|
| 1. General Statement .....                                               | S2  |
| 2. Synthesis of 2-Arylbenzofurans <b>3</b> .....                         | S2  |
| 3. Orthogonal Synthesis of Eupomatenoid <b>6 (4)</b> .....               | S15 |
| 4. Mechanistic Studies .....                                             | S18 |
| 5. Reaction Mechanisms .....                                             | S20 |
| 6. References .....                                                      | S20 |
| 7. <sup>1</sup> H, <sup>13</sup> C, and <sup>19</sup> F NMR Charts ..... | S22 |

## 1. General Statement

$^1\text{H}$  NMR,  $^{13}\text{C}$  NMR, and  $^{19}\text{F}$  NMR spectra were recorded on a Bruker Avance 500. Chemical shift values are given in ppm relative to internal  $\text{Me}_4\text{Si}$  (for  $^1\text{H}$  NMR:  $\delta = 0.00$  ppm),  $\text{CDCl}_3$  (for  $^{13}\text{C}$  NMR:  $\delta = 77.0$  ppm), and  $\text{C}_6\text{F}_6$  (for  $^{19}\text{F}$  NMR:  $\delta = 0.00$  ppm). IR spectra were recorded on a Horiba FT-300S spectrometer by the attenuated total reflectance (ATR) method. Mass spectra were measured on a JEOL JMS-T100GCV and a JEOL JMS-T100CS spectrometer. Gel permeation chromatography (GPC) was performed on a Japan Analytical Industry LC-908 apparatus equipped with a JAIGEL-1H and -2H assembly. Elemental analyses were carried out at the Elemental Analysis Laboratory, Division of Chemistry, Faculty of Pure and Applied Sciences, University of Tsukuba. X-ray diffraction studies were performed on a Bruker APEXII ULTRA instrument equipped with a CCD diffractometer using  $\text{MoK}\alpha$  (graphite monochromated,  $\lambda = 0.71069$  Å) radiation. The structure refinement was performed using the Yadokari-XG software.<sup>1</sup> The structure was solved by direct methods (SIR97).<sup>2</sup> The positional and thermal parameters of non-hydrogen atoms were refined anisotropically on F2 by the full-matrix least-squares method using SHELX-97.<sup>3</sup> Hydrogen atoms were placed at calculated positions and refined with the riding mode on their corresponding carbon atoms. The CCDC deposition number of compound **4** is 2075144.

Column chromatography and preparative thin-layer chromatography were conducted on silica gel (Silica Gel 60 N, Kanto Chemical Co., Inc. for column chromatography and Wakogel B-5F, Wako Pure Chemical Industries for preparative thin-layer chromatography). Dichloromethane was purified by a solvent-purification system (GlassContour) equipped with columns of activated alumina and supported-copper catalyst (Q-5) before use. 1,1,1,3,3,3-Hexafluoropropan-2-ol (HFIP) was distilled from molecular sieves 4A and stored over activated molecular sieves 4A. 1,2-Dichloroethane (DCE) was distilled from  $\text{P}_2\text{O}_5$  and stored over activated molecular sieves 4A. *p*-Xylene (**2a**) and *m*-xylene (**2b**) were distilled from  $\text{CaH}_2$  and stored over activated molecular sieves 4A. 2-Fluorobenzofurans **1a–1l** and **1n**,<sup>4,5</sup> 2-fluorobenzothiophene (**1m**),<sup>6</sup> 5-bromo-3-methylbenzofuran-2-carboxylic acid,<sup>7,8</sup> 2-chlorobenzofuran (**1a-Cl**),<sup>9,10</sup> 2-bromobenzofuran (**1a-Br**),<sup>11,12</sup> and 2-iodobenzofuran (**1a-I**)<sup>13,14</sup> were prepared according to the literature procedures, and their spectral data showed good agreement with the literature data. Unless otherwise noted, materials were obtained from commercial sources and used directly without further purifications.

## 2. Synthesis of 2-Arylbenzofurans **3**

### 2-(2,5-Dimethylphenyl)benzofuran (**3aa**)

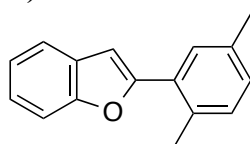

#### Method A:

To a dichloromethane (2.0 mL) suspension of  $\text{AlCl}_3$  (41 mg, 0.31 mmol) and *p*-xylene (**2a**, 0.12

mL, 1.0 mmol) was added 2-fluorobenzofuran (**1a**, 27 mg, 0.20 mmol) at  $-20\text{ }^{\circ}\text{C}$ . After stirring at the same temperature for 1 h, aqueous NaOH (2 M, 1 mL) was added and allowed to warm to room temperature. To the mixture was added aqueous HCl (2 M, 1 mL), and organic materials were extracted with dichloromethane (2 mL) three times. The combined extracts were dried over  $\text{Na}_2\text{SO}_4$ . After removal of the solvent under reduced pressure, the residue was purified by preparative thin-layer chromatography (hexane/ethyl acetate = 30/1) to give **3aa** (28 mg, 63%) as a colorless crystal.

#### Method B:

To a mixture of  $\text{AlCl}_3$  (41 mg, 0.31 mmol) and *p*-xylene (**2a**, 0.50 mL, 4.1 mmol) was added 2-fluorobenzofuran (**1a**, 28 mg, 0.20 mmol) at room temperature. After stirring at room temperature for 1 h, aqueous NaOH (2 M, 1 mL) was added. To the mixture was added aqueous HCl (2 M, 1 mL), and organic materials were extracted with dichloromethane (2 mL) three times. The combined extracts were dried over  $\text{Na}_2\text{SO}_4$ . After removal of the solvent under reduced pressure, the residue was purified by preparative thin-layer chromatography (hexane/ethyl acetate = 30/1) to give **3aa** (41 mg, 91%) as a colorless crystal.

$^1\text{H}$  NMR (500 MHz,  $\text{CDCl}_3$ ):  $\delta$  2.39 (s, 3H), 2.53 (s, 3H), 6.88 (d,  $J = 0.9$  Hz, 1H), 7.10 (d,  $J = 7.8$  Hz, 1H), 7.18 (d,  $J = 7.8$  Hz, 1H), 7.22–7.30 (m, 2H), 7.52 (dd,  $J = 8.2, 0.8$  Hz, 1H), 7.60 (d,  $J = 7.6$  Hz, 1H), 7.68 (s, 1H).  $^{13}\text{C}$  NMR (126 MHz,  $\text{CDCl}_3$ ):  $\delta$  20.9, 21.4, 104.9, 111.0, 120.8, 122.7, 124.1, 128.5, 129.16, 129.23, 129.6, 131.2, 132.7, 135.5, 154.3, 155.7.

Spectral data for this compound showed good agreement with literature data.<sup>14</sup>

#### 2-(2,4-Dimethylphenyl)benzofuran (**3ab**)

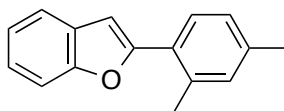

2-Arylbenzofuran **3ab** was synthesized by Method A using 2-fluorobenzofuran (**1a**, 27 mg, 0.20 mmol), *m*-xylene (**2b**, 0.12 mL, 1.0 mmol),  $\text{AlCl}_3$  (40 mg, 0.30 mmol), and dichloromethane (2.0 mL) at  $-20\text{ }^{\circ}\text{C}$  for 1 h. Purification by preparative thin-layer chromatography (hexane/ethyl acetate = 30/1) gave **3ab** (29 mg, 67%) as a colorless crystal.

$^1\text{H}$  NMR (500 MHz,  $\text{CDCl}_3$ ):  $\delta$  2.38 (s, 3H), 2.56 (s, 3H), 6.86 (s, 1H), 7.13–7.14 (m, 2H), 7.23–7.31 (m, 2H), 7.53 (d,  $J = 8.2$  Hz, 1H), 7.61 (dd,  $J = 7.6, 0.7$  Hz, 1H), 7.76 (d,  $J = 8.6$  Hz, 1H).  $^{13}\text{C}$  NMR (126 MHz,  $\text{CDCl}_3$ ):  $\delta$  21.2, 21.9, 104.5, 111.1, 120.8, 122.7, 124.0, 126.9, 127.2, 128.1, 129.3, 132.1, 135.7, 138.5, 154.3, 155.9.

Spectral data for this compound showed good agreement with literature data.<sup>15</sup>

### 2-(Thiophen-2-yl)benzofuran (3ac)

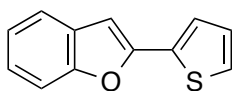

2-Arylbenzofuran **3ac** was synthesized by Method A using 2-fluorobenzofuran (**1a**, 27 mg, 0.20 mmol), thiophene (**2c**, 80  $\mu$ L, 1.0 mmol),  $\text{AlCl}_3$  (40 mg, 0.30 mmol), and dichloromethane (2.0 mL) at  $-20$   $^\circ\text{C}$  for 1 h. Purification by preparative thin-layer chromatography (hexane/ethyl acetate = 30/1) gave **3ac** (33 mg, 84%) as a colorless crystal.

$^1\text{H}$  NMR (500 MHz,  $\text{CDCl}_3$ ):  $\delta$  6.87 (d,  $J = 0.9$  Hz, 1H), 7.11 (dd,  $J = 5.1, 3.7$  Hz, 1H), 7.20–7.29 (m, 2H), 7.34 (dd,  $J = 5.1, 1.1$  Hz, 1H), 7.48–7.50 (m, 2H), 7.54 (ddd,  $J = 7.6, 1.4, 0.7$  Hz, 1H).  $^{13}\text{C}$  NMR (126 MHz,  $\text{CDCl}_3$ ):  $\delta$  101.1, 111.1, 120.7, 123.1, 124.3, 124.6, 125.8, 127.9, 129.1, 133.3, 151.3, 154.5.

Spectral data for this compound showed good agreement with literature data.<sup>16</sup>

### 4-(Benzofuran-2-yl)phenol (3ad)

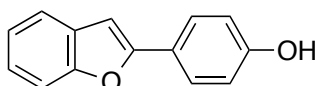

2-Arylbenzofuran **3ad** was synthesized by Method A using 2-fluorobenzofuran (**1a**, 27 mg, 0.20 mmol), phenol (**2d**, 94 mg, 1.0 mmol),  $\text{AlCl}_3$  (40 mg, 0.30 mmol), and dichloromethane (2.0 mL) at room temperature for 1 h. Purification by preparative thin-layer chromatography (hexane/ethyl acetate = 3/1) gave **3ad** (14 mg, 34%) as a white solid.

$^1\text{H}$  NMR (500 MHz,  $\text{CDCl}_3$ ):  $\delta$  4.99 (s, 1H), 6.88 (d,  $J = 0.8$  Hz, 1H), 6.91 (d,  $J = 8.8$  Hz, 2H), 7.19–7.27 (m, 2H), 7.49 (d,  $J = 8.2$  Hz, 1H), 7.55 (d,  $J = 6.5$  Hz, 1H), 7.76 (d,  $J = 8.8$  Hz, 2H).  $^{13}\text{C}$  NMR (126 MHz,  $\text{CDCl}_3$ ):  $\delta$  99.7, 111.0, 115.7, 120.6, 122.8, 123.6, 123.8, 126.7, 129.4, 154.7, 155.9, 156.0.

Spectral data for this compound showed good agreement with literature data.<sup>17</sup>

### 2-(2,4-Dimethoxyphenyl)benzofuran (3ae)

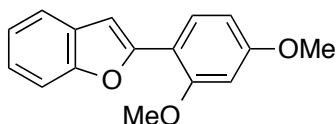

2-Arylbenzofuran **3ae** was synthesized by Method A using 2-fluorobenzofuran (**1a**, 56 mg, 0.41 mmol), 1,3-dimethoxybenzene (**2e**, 0.26 mL, 2.0 mmol),  $\text{AlCl}_3$  (82 mg, 0.61 mmol), and dichloromethane (4.0 mL) at  $40$   $^\circ\text{C}$  for 24 h. Purification by GPC (chloroform) gave **3ae** (67 mg, 64%) as a colorless oil.

$^1\text{H}$  NMR (500 MHz,  $\text{CDCl}_3$ ):  $\delta$  3.85 (s, 3H), 3.96 (s, 3H), 6.56 (d,  $J = 2.3$  Hz, 1H), 6.61 (dd,  $J = 8.6, 2.3$  Hz, 1H), 7.17–7.24 (m, 3H), 7.47 (d,  $J = 8.0$  Hz, 1H), 7.55 (dd,  $J = 7.5, 1.4$  Hz, 1H), 7.97 (d,

$J = 8.6$  Hz, 1H).  $^{13}\text{C}$  NMR (126 MHz,  $\text{CDCl}_3$ ):  $\delta$  55.45, 55.48, 98.8, 104.2, 104.8, 110.6, 112.8, 120.7, 122.5, 123.5, 128.0, 130.0, 152.4, 153.7, 157.8, 160.9. IR (neat):  $\nu$  2960, 2939, 2837, 1612, 1504, 1452, 1290, 1254, 1211, 1159, 1049, 1032, 798, 750  $\text{cm}^{-1}$ . HRMS (EI):  $m/z$  Calcd. for  $\text{C}_{16}\text{H}_{14}\text{O}_3$   $[\text{M}]^+$ : 254.0943; Found: 254.0947.

### 3-Butyl-2-(2,5-dimethylphenyl)benzofuran (3ba)

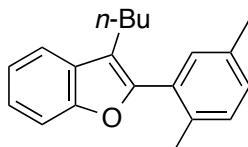

2-Arylbenzofuran **3ba** was synthesized by Method A using 3-butyl-2-fluorobenzofuran (**1b**, 39 mg, 0.20 mmol), *p*-xylene (**2a**, 0.12 mL, 1.0 mmol),  $\text{AlCl}_3$  (40 mg, 0.30 mmol), and dichloromethane (1.0 mL) at  $-20$  °C for 3 h. Purification by silica gel column chromatography (hexane/ethyl acetate = 25/1) gave **3ba** (40 mg, 70%) as a colorless oil.

$^1\text{H}$  NMR (500 MHz,  $\text{CDCl}_3$ ):  $\delta$  0.86 (t,  $J = 7.3$  Hz, 3H), 1.29–1.36 (m, 2H), 1.62–1.68 (m, 2H), 2.27 (s, 3H), 2.36 (s, 3H), 2.65 (t,  $J = 7.7$  Hz, 2H), 7.16 (d,  $J = 8.0$  Hz, 1H), 7.19–7.21 (m, 2H), 7.23–7.30 (m, 2H), 7.46 (d,  $J = 8.0$  Hz, 1H), 7.60 (d,  $J = 7.6$  Hz, 1H).  $^{13}\text{C}$  NMR (126 MHz,  $\text{CDCl}_3$ ):  $\delta$  13.8, 19.7, 20.9, 22.5, 23.7, 31.7, 111.1, 116.8, 119.7, 122.1, 123.7, 129.6, 129.8, 130.2, 130.4, 131.1, 134.9, 135.2, 152.3, 154.3. IR (neat):  $\nu$  2954, 2927, 2858, 1452, 1257, 1101, 872, 812, 743  $\text{cm}^{-1}$ . HRMS (EI):  $m/z$  Calcd. for  $\text{C}_{20}\text{H}_{22}\text{O}$   $[\text{M}]^+$ : 278.1671; Found: 278.1670.

### 3-Butyl-2-(2,4-dimethylphenyl)benzofuran (3bb)

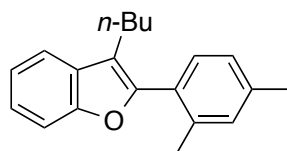

2-Arylbenzofuran **3bb** was synthesized by Method A using 3-butyl-2-fluorobenzofuran (**1b**, 48 mg, 0.25 mmol), *m*-xylene (**2b**, 133 mg, 1.3 mmol),  $\text{AlCl}_3$  (52 mg, 0.39 mmol), and dichloromethane (2.5 mL) at room temperature for 2 h. Purification by preparative thin-layer chromatography (hexane/ethyl acetate = 30/1) gave **3bb** (39 mg, 57%) as a colorless oil.

$^1\text{H}$  NMR (500 MHz,  $\text{CDCl}_3$ ):  $\delta$  0.87 (t,  $J = 7.5$  Hz, 3H), 1.33 (qt,  $J = 7.5, 7.5$  Hz, 2H), 1.65 (tt,  $J = 7.5, 7.5$  Hz, 2H), 2.30 (s, 3H), 2.40 (s, 3H), 2.66 (t,  $J = 7.5$  Hz, 2H), 7.09 (d,  $J = 7.8$  Hz, 1H), 7.15 (s, 1H), 7.24–7.30 (m, 3H), 7.47 (d,  $J = 8.0$  Hz, 1H), 7.61 (d,  $J = 7.4$  Hz, 1H).  $^{13}\text{C}$  NMR (126 MHz,  $\text{CDCl}_3$ ):  $\delta$  13.8, 20.1, 21.3, 22.6, 23.7, 31.8, 111.1, 116.8, 119.7, 122.0, 123.6, 126.2, 127.5, 129.7, 130.5, 131.3, 138.2, 138.9, 152.3, 154.3. IR (neat):  $\nu$  2956, 2927, 2858, 1614, 1454, 1259, 744, 592  $\text{cm}^{-1}$ . HRMS (EI):  $m/z$  Calcd. for  $\text{C}_{20}\text{H}_{22}\text{O}$   $[\text{M}]^+$ : 278.1671; Found: 278.1680.

### 3-Butyl-2-(thiophen-2-yl)benzofuran (**3bc**)

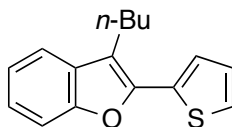

2-Arylbenzofuran **3bc** was synthesized by Method A using 3-butyl-2-fluorobenzofuran (**1b**, 39 mg, 0.20 mmol), thiophene (**2c**, 84 mg, 1.0 mmol), AlCl<sub>3</sub> (42 mg, 0.31 mmol), and dichloromethane (2.0 mL) at room temperature for 1 h. Purification by silica gel column chromatography (hexane) gave **3bb** (20 mg, 38%) as a pale yellow oil.

<sup>1</sup>H NMR (500 MHz, CDCl<sub>3</sub>): δ 0.97 (t, *J* = 7.3 Hz, 3H), 1.46–1.54 (m, 2H), 1.69–1.74 (m, 2H), 2.92 (t, *J* = 8.0 Hz, 2H), 7.14–7.15 (m, 1H), 7.21–7.29 (m, 2H), 7.37 (ddd, *J* = 5.1, 1.2, 1.2 Hz, 1H), 7.45–7.48 (m, 2H), 7.53 (dd, *J* = 7.7, 0.7 Hz, 1H). <sup>13</sup>C NMR (126 MHz, CDCl<sub>3</sub>): δ 14.0, 22.9, 24.0, 31.5, 110.9, 116.0, 119.4, 122.5, 124.3, 124.8, 125.5, 127.5, 130.4, 133.2, 146.5, 153.8. IR (neat): ν 2954, 2927, 2858, 1454, 1259, 1214, 1103, 1013, 851, 743, 694 cm<sup>-1</sup>. HRMS (EI): *m/z* Calcd. for C<sub>16</sub>H<sub>16</sub>OS [M]<sup>+</sup>: 256.0922; Found: 256.0925.

### 3-Butyl-2-(2,4-dimethoxyphenyl)benzofuran (**3bf**)

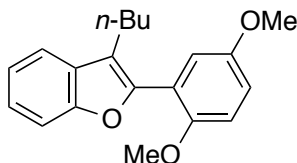

2-Arylbenzofuran **3bf** was synthesized by Method A using 3-butyl-2-fluorobenzofuran (**1b**, 39 mg, 0.20 mmol), 1,4-dimethoxybenzene (**2f**, 57 mg, 0.41 mmol), AlCl<sub>3</sub> (41 mg, 0.31 mmol), and dichloromethane (2.0 mL) at room temperature for 2 h. Purification by silica gel column chromatography (toluene/dichloromethane = 10/1) gave **3bf** (47 mg, 75%) as a pale yellow oil.

<sup>1</sup>H NMR (500 MHz, CDCl<sub>3</sub>): δ 0.88 (t, *J* = 7.4 Hz, 3H), 1.35 (qt, *J* = 7.5, 7.4 Hz, 2H), 1.63–1.69 (m, 2H), 2.69 (t, *J* = 7.8 Hz, 2H), 3.79 (s, 3H), 3.82 (s, 3H), 6.93–6.97 (m, 2H), 7.05 (dd, *J* = 1.1, 1.1 Hz, 1H), 7.22–7.29 (m, 2H), 7.48 (dd, *J* = 7.8, 0.7 Hz, 1H), 7.59 (dd, *J* = 7.6, 0.8 Hz, 1H). <sup>13</sup>C NMR (126 MHz, CDCl<sub>3</sub>): δ 13.9, 22.8, 24.1, 31.6, 55.8, 56.3, 111.1, 112.8, 115.6, 116.6, 118.1, 119.8, 121.0, 122.0, 123.8, 129.9, 148.6, 151.8, 153.4, 154.5. IR (neat): ν 2954, 2858, 2832, 2360, 1498, 1454, 1473, 1223, 1174, 1039, 804, 733 cm<sup>-1</sup>. HRMS (EI): *m/z* Calcd. for C<sub>20</sub>H<sub>22</sub>O<sub>3</sub> [M]<sup>+</sup>: 310.1569; Found: 310.1564.

### 2-(2,5-Dimethylphenyl)-3-phenylbenzofuran (**3ca**)

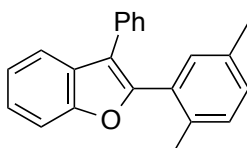

2-Arylbenzofuran **3ca** was synthesized by Method A using 2-fluoro-3-phenylbenzofuran (**1c**, 42 mg, 0.20 mmol), *p*-xylene (**2a**, 0.12 mL, 1.0 mmol), AlCl<sub>3</sub> (40 mg, 0.30 mmol), and dichloromethane (2.0 mL) at -20 °C for 1 h. Purification by preparative thin-layer chromatography (hexane/ethyl acetate = 20/1) gave **3ca** (12 mg, 21%) as a white solid.

2-Arylbenzofuran **3ca** was also synthesized by Method B using 2-fluoro-3-phenylbenzofuran (**1c**, 25 mg, 0.12 mmol), *p*-xylene (**2a**, 0.38 mL, 3.1 mmol), and AlCl<sub>3</sub> (31 mg, 0.23 mmol) at room temperature for 1 h. Purification by preparative thin-layer chromatography (hexane/ethyl acetate = 30/1) gave **3ca** (9.0 mg, 26%) as a white solid.

<sup>1</sup>H NMR (500 MHz, CDCl<sub>3</sub>): δ 2.03 (s, 3H), 2.29 (s, 3H), 7.10 (d, *J* = 1.7 Hz, 1H), 7.24–7.39 (m, 9H), 7.55 (d, *J* = 8.2 Hz, 1H), 7.74–7.76 (m, 1H). <sup>13</sup>C NMR (126 MHz, CDCl<sub>3</sub>): δ 19.6, 20.8, 111.2, 118.3, 120.0, 122.8, 124.3, 126.9, 127.1, 128.6, 128.67, 128.72, 130.0, 130.5, 131.2, 132.8, 134.5, 135.1, 152.1, 154.5. IR (neat): ν 3033, 2924, 1653, 1606, 1452, 814, 742, 698 cm<sup>-1</sup>. HRMS (EI): *m/z* Calcd. for C<sub>22</sub>H<sub>18</sub>O [M]<sup>+</sup>: 298.1358; Found: 298.1350.

### 2-(2,5-Dimethylphenyl)-3-(4-fluorophenyl)benzofuran (**3da**)

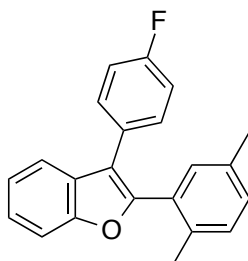

2-Arylbenzofuran **3da** was synthesized by Method A using 2-fluoro-3-(4-fluorophenyl)benzofuran (**1d**, 46 mg, 0.20 mmol), *p*-xylene (**2a**, 0.12 mL, 1.0 mmol), AlCl<sub>3</sub> (40 mg, 0.30 mmol), and dichloromethane (2.0 mL) at -20 °C for 1 h. Purification by preparative thin-layer chromatography (hexane/ethyl acetate = 20/1) gave **3da** (16 mg, 25%) as a white solid.

2-Arylbenzofuran **3da** was also synthesized by Method B using 2-fluoro-3-(4-fluorophenyl)benzofuran (**1d**, 31 mg, 0.14 mmol), *p*-xylene (**2a**, 0.38 mL, 3.1 mmol), and AlCl<sub>3</sub> (30 mg, 0.22 mmol) at room temperature for 1 h. Purification by preparative thin-layer chromatography (hexane/ethyl acetate = 30/1) gave **3da** (14 mg, 33%) as a white solid.

<sup>1</sup>H NMR (500 MHz, CDCl<sub>3</sub>): δ 2.03 (s, 3H), 2.28 (s, 3H), 7.03 (dd, *J*<sub>HF</sub> = 8.6 Hz, *J* = 8.6 Hz, 2H), 7.10 (s, 1H), 7.21 (br s, 1H), 7.27–7.35 (m, 4H), 7.53 (d, *J* = 8.1 Hz, 1H), 7.68 (d, *J* = 8.1 Hz, 1H). <sup>13</sup>C NMR (126 MHz, CDCl<sub>3</sub>): δ 19.6, 20.8, 111.4, 115.7 (d, *J*<sub>CF</sub> = 21 Hz, 1H), 117.4, 119.8, 122.9, 124.4, 128.4, 128.9 (d, *J*<sub>CF</sub> = 3 Hz, 1H), 129.9 (d, *J*<sub>CF</sub> = 5 Hz, 1H), 130.1, 130.4 (d, *J*<sub>CF</sub> = 8 Hz, 1H), 130.6, 131.2, 134.5, 135.2, 152.2, 154.5, 161.9 (d, *J*<sub>CF</sub> = 247 Hz, 1H). <sup>19</sup>F NMR (500 MHz, CDCl<sub>3</sub>):

$\delta$  47.8 (tt,  $J_{\text{FH}} = 9, 5$  Hz). IR (neat):  $\nu$  2962, 2922, 1512, 1450, 1221, 837, 812, 744, 525  $\text{cm}^{-1}$ . HRMS (EI):  $m/z$  Calcd. for  $\text{C}_{22}\text{H}_{17}\text{FO}$   $[\text{M}]^+$ : 316.1263; Found: 316.1265.

### 2-(2,5-Dimethylphenyl)-5-phenylbenzofuran (3ea)

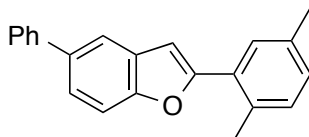

2-Arylbenzofuran **3ea** was synthesized by Method A using 2-fluoro-5-phenylbenzofuran (**1e**, 42 mg, 0.20 mmol), *p*-xylene (**2a**, 0.12 mL, 1.0 mmol),  $\text{AlCl}_3$  (40 mg, 0.30 mmol), and dichloromethane (2.0 mL) at  $-20$   $^\circ\text{C}$  for 1 h. Purification by preparative thin-layer chromatography (hexane/ethyl acetate = 30/1) gave **3ea** (42 mg, 70%) as a white solid.

2-Arylbenzofuran **3ea** was also synthesized by Method B using 2-fluoro-5-phenylbenzofuran (**1e**, 43 mg, 0.20 mmol), *p*-xylene (**2a**, 0.50 mL, 4.1 mmol), and  $\text{AlCl}_3$  (39 mg, 0.29 mmol) at room temperature for 1 h. Purification by preparative thin-layer chromatography (hexane/ethyl acetate = 30/1) gave **3ea** (59 mg, 96%) as a white solid.

$^1\text{H}$  NMR (500 MHz,  $\text{CDCl}_3$ ):  $\delta$  2.40 (s, 3H), 2.55 (s, 3H), 6.91 (s, 1H), 7.10–7.19 (m, 2H), 7.33–7.36 (m, 1H), 7.43–7.78 (m, 8H).  $^{13}\text{C}$  NMR (126 MHz,  $\text{CDCl}_3$ ):  $\delta$  21.0, 21.4, 105.1, 111.1, 119.3, 123.9, 126.8, 127.4, 128.6, 128.7, 129.3, 129.5, 129.7, 131.2, 132.7, 135.5, 136.4, 141.7, 153.9, 156.5. IR (neat):  $\nu$  3030, 2922, 2862, 1458, 1036, 804, 760, 698  $\text{cm}^{-1}$ . HRMS (EI):  $m/z$  Calcd. for  $\text{C}_{22}\text{H}_{18}\text{O}$   $[\text{M}]^+$ : 298.1358; Found: 298.1361. Elem. Anal. Calcd. for  $\text{C}_{22}\text{H}_{18}\text{O}$ : C, 88.56; H, 6.08. Found: C, 88.52; H, 6.12.

### 2-(2,4-Dimethylphenyl)-5-phenylbenzofuran (3eb)

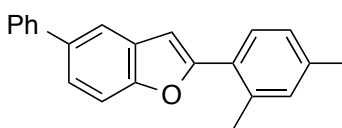

2-Arylbenzofuran **3eb** was synthesized by Method A using 2-fluoro-5-phenylbenzofuran (**1e**, 44 mg, 0.21 mmol), *m*-xylene (**2b**, 0.12 mL, 1.0 mmol),  $\text{AlCl}_3$  (40 mg, 0.30 mmol), and dichloromethane (2.0 mL) at  $-20$   $^\circ\text{C}$  for 1 h. Purification by preparative thin-layer chromatography (hexane) gave **3eb** (31 mg, 51%) as a colorless crystal.

2-Arylbenzofuran **3eb** was also synthesized by Method B using 2-fluoro-5-phenylbenzofuran (**1e**, 43 mg, 0.20 mmol), *m*-xylene (**2b**, 0.50 mL, 4.1 mmol), and  $\text{AlCl}_3$  (40 mg, 0.30 mmol) at room temperature for 1 h. Purification by preparative thin-layer chromatography (hexane) gave **3eb** (61 mg, 99%) as a colorless crystal.

$^1\text{H}$  NMR (500 MHz,  $\text{CDCl}_3$ ):  $\delta$  2.35 (s, 3H), 2.54 (s, 3H), 6.86 (s, 1H), 7.10–7.11 (m, 2H), 7.31–



7.34 (m, 1H), 7.43 (dd,  $J = 8.0, 7.9$  Hz, 2H), 7.49 (dd,  $J = 8.5, 1.9$  Hz, 1H), 7.54 (d,  $J = 8.5$  Hz, 1H), 7.61 (dd,  $J = 8.0, 0.9$  Hz, 2H), 7.74–7.76 (m, 2H).  $^{13}\text{C}$  NMR (126 MHz,  $\text{CDCl}_3$ ):  $\delta$  21.2, 21.8, 104.6, 111.1, 119.2, 123.7, 126.79, 126.84, 127.0, 127.4, 128.1, 128.7, 129.8, 132.0, 135.6, 136.4, 138.5, 141.7, 153.9, 156.6. IR (neat):  $\nu$  3030, 2922, 1462, 1036, 800, 760, 696  $\text{cm}^{-1}$ . HRMS (EI):  $m/z$  Calcd. for  $\text{C}_{22}\text{H}_{18}\text{O}$   $[\text{M}]^+$ : 298.1358, Found: 298.1359.

### 5-Phenyl-2-(thiophen-2-yl)benzofuran (3ec)

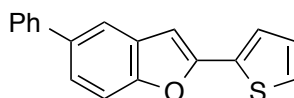

2-Arylbenzofuran **3ec** was synthesized by Method A using 2-fluoro-5-phenylbenzofuran (**1e**, 42 mg, 0.20 mmol), thiophene (**2c**, 80  $\mu\text{L}$ , 1.0 mmol),  $\text{AlCl}_3$  (41 mg, 0.31 mmol), and dichloromethane (2.0 mL) at  $-20$   $^\circ\text{C}$  for 1 h. Purification by preparative thin-layer chromatography (hexane/ethyl acetate = 30/1) gave **3ec** (17 mg, 30%) as a colorless crystal.

$^1\text{H}$  NMR (500 MHz,  $\text{CDCl}_3$ ):  $\delta$  6.91 (s, 1H), 7.11–7.13 (m, 1H), 7.34–7.37 (m, 2H), 7.44–7.56 (m, 5H), 7.62–7.64 (m, 2H), 7.73 (s, 1H).  $^{13}\text{C}$  NMR (126 MHz,  $\text{CDCl}_3$ ):  $\delta$  101.2, 111.1, 119.2, 124.0, 124.7, 125.9, 126.9, 127.4, 127.9, 128.7, 129.6, 133.2, 136.8, 141.6, 151.9, 154.2. IR (neat):  $\nu$  1464, 1265, 1201, 1147, 999, 879, 827, 800, 762, 696  $\text{cm}^{-1}$ . HRMS (EI):  $m/z$  Calcd for  $\text{C}_{18}\text{H}_{12}\text{OS}$   $[\text{M}]^+$ : 276.0609; Found: 276.0617.

### 2-(2,5-Dimethylphenyl)-5-(4-fluorophenyl)benzofuran (3fa)

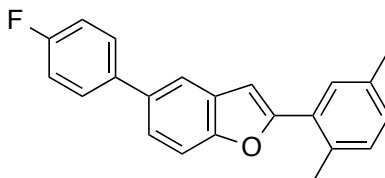

2-Arylbenzofuran **3fa** was synthesized by Method A using 2-fluoro-5-(4-fluorophenyl)benzofuran (**1f**, 46 mg, 0.20 mmol), *p*-xylene (**2a**, 0.12 mL, 1.0 mmol),  $\text{AlCl}_3$  (40 mg, 0.30 mmol), and dichloromethane (2.0 mL) at  $-20$   $^\circ\text{C}$  for 1 h. Purification by preparative thin-layer chromatography (hexane/ethyl acetate = 20/1) gave **3fa** (47 mg, 74%) as a colorless crystal.

$^1\text{H}$  NMR (500 MHz,  $\text{CDCl}_3$ ):  $\delta$  2.38 (s, 3H), 2.53 (s, 3H), 6.88 (s, 1H), 7.09–7.13 (m, 3H), 7.17 (d,  $J = 7.7$  Hz, 1H), 7.43 (dd,  $J = 8.5, 1.9$  Hz, 1H), 7.53–7.56 (m, 3H), 7.68 (br s, 1H), 7.70 (d,  $J = 1.6$  Hz, 1H).  $^{13}\text{C}$  NMR (126 MHz,  $\text{CDCl}_3$ ):  $\delta$  21.0, 21.5, 105.0, 111.2, 115.5 (d,  $J_{\text{CF}} = 21$  Hz), 119.2, 123.7, 128.6, 128.9 (d,  $J_{\text{CF}} = 8$  Hz), 129.4, 129.5, 129.8, 131.3, 132.7, 135.5, 135.6, 137.8 (d,  $J_{\text{CF}} = 3$  Hz), 153.9, 156.6, 162.2 (d,  $J_{\text{CF}} = 260$  Hz).  $^{19}\text{F}$  NMR (470 MHz,  $\text{CDCl}_3$ ):  $\delta$  46.3 (tt,  $J_{\text{FH}} = 9, 5$  Hz). IR (neat):  $\nu$  3039, 2927, 2864, 1514, 1460, 1219, 1157, 837, 802, 526  $\text{cm}^{-1}$ . HRMS (EI):  $m/z$  Calcd. for  $\text{C}_{22}\text{H}_{17}\text{FO}$   $[\text{M}]^+$ : 316.1263; Found: 316.1262.

### 2-(2,4-Dimethylphenyl)-5-(4-fluorophenyl)benzofuran (3fb)

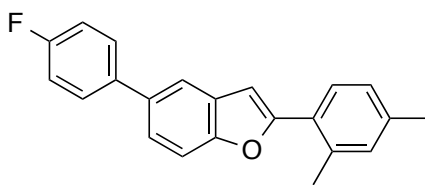

2-Arylbenzofuran **3fb** was synthesized by Method A using 2-fluoro-5-(4-fluorophenyl)benzofuran (**1f**, 47 mg, 0.21 mmol), *m*-xylene (**2b**, 0.12 mL, 1.0 mmol), AlCl<sub>3</sub> (40 mg, 0.30 mmol), and dichloromethane (2.0 mL) at -20 °C for 1 h. Purification by preparative thin-layer chromatography (hexane/ethyl acetate = 30/1) gave **3fb** (37 mg, 56%) as a colorless crystal.

2-Arylbenzofuran **3fb** was also synthesized by Method B using 2-fluoro-5-(4-fluorophenyl)benzofuran (**1f**, 51 mg, 0.22 mmol), *m*-xylene (**2b**, 0.50 mL, 4.1 mmol), and AlCl<sub>3</sub> (41 mg, 0.31 mmol) at room temperature for 1 h. Purification by preparative thin-layer chromatography (hexane/ethyl acetate = 30/1) gave **3fb** (46 mg, 65%) as a colorless crystal.

<sup>1</sup>H NMR (500 MHz, CDCl<sub>3</sub>): δ 2.36 (s, 3H), 2.55 (s, 3H), 6.85 (s, 1H), 7.10–7.14 (m, 4H), 7.42 (dd, *J* = 8.5, 1.9 Hz, 1H), 7.53–7.57 (m, 3H), 7.70 (d, *J* = 1.9 Hz, 1H), 7.74 (d, *J* = 8.5 Hz, 1H). <sup>13</sup>C NMR (126 MHz, CDCl<sub>3</sub>): δ 21.2, 21.8, 104.5, 111.1, 115.5 (d, *J*<sub>CF</sub> = 21 Hz), 119.1, 123.6, 126.9, 127.0, 128.1, 128.9 (d, *J*<sub>CF</sub> = 8 Hz), 129.9, 132.1, 135.5, 135.7, 137.9 (d, *J*<sub>CF</sub> = 3 Hz), 138.6, 153.8, 156.7, 162.2 (d, *J*<sub>CF</sub> = 246 Hz). <sup>19</sup>F NMR (470 MHz, CDCl<sub>3</sub>): δ 46.2 (tt, *J*<sub>FH</sub> = 9, 5 Hz). IR (neat): ν 2983, 2918, 1514, 1464, 1225, 1161, 1018, 798 cm<sup>-1</sup>. HRMS (EI): *m/z* Calcd. for C<sub>22</sub>H<sub>17</sub>FO [M]<sup>+</sup>: 316.1263; Found: 316.1260.

### Ethyl 4-[2-(2,5-Dimethylphenyl)benzofuran-5-yl]benzoate (3ga)

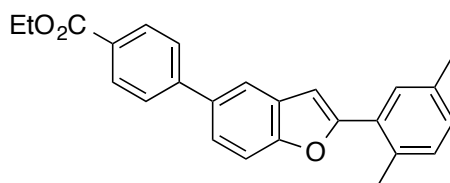

2-Arylbenzofuran **3ga** was synthesized by Method A using ethyl 4-(2-fluorobenzofuran-5-yl)benzoate (**1g**, 57 mg, 0.20 mmol), *p*-xylene (**2a**, 0.12 mL, 1.0 mmol), AlCl<sub>3</sub> (40 mg, 0.30 mmol), and dichloromethane (2.0 mL) at -20 °C for 1 h. Purification by preparative thin-layer chromatography (hexane/ethyl acetate = 10/1) gave **3ga** (38 mg, 52%) as a colorless crystal.

<sup>1</sup>H NMR (500 MHz, CDCl<sub>3</sub>): δ 1.43 (t, *J* = 7.2 Hz, 3H), 2.41 (s, 3H), 2.56 (s, 3H), 4.41 (q, *J* = 7.2 Hz, 2H), 6.94 (d, *J* = 0.8 Hz, 1H), 7.13 (d, *J* = 7.7 Hz, 1H), 7.20 (d, *J* = 7.7 Hz, 1H), 7.55 (dd, *J* = 8.5, 1.9 Hz, 1H), 7.60 (d, *J* = 8.5 Hz, 1H), 7.70–7.71 (m, 3H), 7.83–7.84 (m, 1H), 8.13 (d, *J* = 8.5 Hz, 2H). <sup>13</sup>C NMR (126 MHz, CDCl<sub>3</sub>): δ 14.4, 21.0, 21.5, 60.9, 105.1, 111.3, 119.6, 123.9, 127.2,

128.6, 128.8, 129.4, 129.5, 129.9, 130.1, 131.3, 132.8, 135.3, 135.6, 146.1, 154.3, 156.8, 166.6. IR (neat):  $\nu$  2976, 2927, 1714, 1608, 1275, 1103, 810, 771  $\text{cm}^{-1}$ . HRMS (ESI+):  $m/z$  Calcd. for  $\text{C}_{25}\text{H}_{23}\text{O}_3$   $[\text{M} + \text{H}]^+$ : 371.1647; Found: 371.1644.

### 5-Bromo-2-(2,5-dimethylphenyl)benzofuran (3ha)

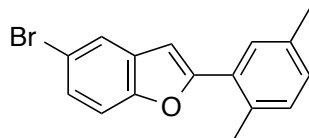

2-Arylbenzofuran **3ha** was synthesized by Method A using 5-bromo-2-fluorobenzofuran (**1h**, 43 mg, 0.20 mmol), *p*-xylene (**2a**, 0.12 mL, 1.0 mmol),  $\text{AlCl}_3$  (41 mg, 0.31 mmol), and dichloromethane (2.0 mL) at  $-20\text{ }^\circ\text{C}$  for 1 h. Purification by preparative thin-layer chromatography (hexane/ethyl acetate = 30/1) gave **3ha** (45 mg, 74%) as a colorless crystal.

2-Arylbenzofuran **3ha** was also synthesized by Method B using 5-bromo-2-fluorobenzofuran (**1h**, 46 mg, 0.21 mmol), *p*-xylene (**2a**, 0.50 mL, 4.1 mmol), and  $\text{AlCl}_3$  (41 mg, 0.30 mmol) at room temperature for 1 h. Purification by preparative thin-layer chromatography (hexane/ethyl acetate = 30/1) gave **3ha** (55 mg, 86%) as a colorless crystal.

$^1\text{H}$  NMR (500 MHz,  $\text{CDCl}_3$ ):  $\delta$  2.38 (s, 3H), 2.51 (s, 3H), 6.80 (s, 1H), 7.10–7.19 (m, 2H), 7.37–7.38 (m, 2H), 7.67 (s, 1H), 7.71 (s, 1H).  $^{13}\text{C}$  NMR (126 MHz,  $\text{CDCl}_3$ ):  $\delta$  20.9, 21.4, 104.2, 112.4, 115.7, 123.4, 126.9, 128.6, 129.0, 129.6, 131.2, 131.3, 132.8, 135.6, 153.0, 157.1. IR (neat):  $\nu$  2922, 2862, 1504, 1442, 1263, 1178, 904, 795, 771, 669  $\text{cm}^{-1}$ . HRMS (EI):  $m/z$  Calcd. for  $\text{C}_{16}\text{H}_{13}^{79}\text{BrO}$   $[\text{M}]^+$ : 300.0150; Found: 300.0155.

### 5-Bromo-2-(2,4-dimethylphenyl)benzofuran (3hb)

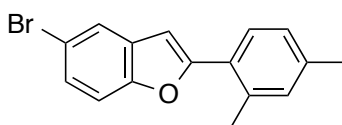

2-Arylbenzofuran **3hb** was synthesized by Method A using 5-bromo-2-fluorobenzofuran (**1h**, 43 mg, 0.20 mmol), *m*-xylene (**2b**, 0.12 mL, 1.0 mmol),  $\text{AlCl}_3$  (41 mg, 0.31 mmol), and dichloromethane (2.0 mL) at  $-20\text{ }^\circ\text{C}$  for 1 h. Purification by preparative thin-layer chromatography (hexane/ethyl acetate = 30/1) gave **3hb** (47 mg, 79%) as a colorless crystal.

2-Arylbenzofuran **3hb** was also synthesized by Method B using 5-bromo-2-fluorobenzofuran (**1h**, 44 mg, 0.20 mmol), *m*-xylene (**2b**, 0.50 mL, 4.1 mmol), and  $\text{AlCl}_3$  (41 mg, 0.31 mmol) at room temperature for 1 h. Purification by preparative thin-layer chromatography (hexane/ethyl acetate = 30/1) gave **3hb** (53 mg, 86%) as a colorless crystal.

$^1\text{H}$  NMR (500 MHz,  $\text{CDCl}_3$ ):  $\delta$  2.36 (s, 3H), 2.51 (s, 3H), 6.75 (s, 1H), 7.09–7.10 (m, 2H), 7.33–7.37 (m, 2H), 7.68–7.71 (m, 2H).  $^{13}\text{C}$  NMR (126 MHz,  $\text{CDCl}_3$ ):  $\delta$  21.2, 21.8, 103.7, 112.4, 115.7, 123.3, 126.5, 126.8, 126.9, 128.1, 131.3, 132.1, 135.7, 138.9, 153.0, 157.2. IR (neat):  $\nu$  3016, 2922, 2862, 1610, 1454, 1441, 1259, 1049, 1020, 793, 671  $\text{cm}^{-1}$ . HRMS (EI):  $m/z$  Calcd. for  $\text{C}_{16}\text{H}_{13}^{79}\text{BrO}$   $[\text{M}]^+$ : 300.0150; Found: 300.0155.

### 5-Bromo-2-(thiophen-2-yl)benzofuran (3hc)

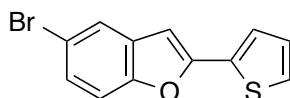

2-Arylbenzofuran **3hc** was synthesized by Method A using 5-bromo-2-fluorobenzofuran (**1h**, 43 mg, 0.20 mmol), thiophene (**2c**, 80  $\mu\text{L}$ , 1.0 mmol),  $\text{AlCl}_3$  (40 mg, 0.30 mmol), and dichloromethane (2.0 mL) at  $-20$   $^\circ\text{C}$  for 1 h. Purification by preparative thin-layer chromatography (hexane/ethyl acetate = 30/1) gave **3hc** (23 mg, 40%) as a colorless crystal.

$^1\text{H}$  NMR (500 MHz,  $\text{CDCl}_3$ ):  $\delta$  6.80 (s, 1H), 7.11 (dd,  $J = 5.0, 3.6$  Hz, 1H), 7.35–7.37 (m, 3H), 7.49 (d,  $J = 3.6, 1.0$  Hz, 1H), 7.66 (dd,  $J = 1.2, 1.2$  Hz, 1H).  $^{13}\text{C}$  NMR (126 MHz,  $\text{CDCl}_3$ ):  $\delta$  100.3, 112.4, 116.1, 123.2, 125.1, 126.3, 127.0, 127.9, 131.1, 132.6, 152.5, 153.2. IR (neat):  $\nu$  1442, 1263, 1200, 1051, 997, 876, 850, 795, 706  $\text{cm}^{-1}$ . HRMS (EI):  $m/z$  Calcd. for  $\text{C}_{12}\text{H}_7^{79}\text{BrOS}$   $[\text{M}]^+$ : 277.9401; Found: 277.9394.

### 2-(2,5-Dimethylphenyl)-5-methoxybenzofuran (3ia)

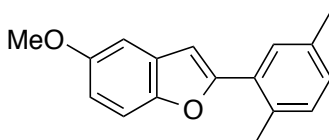

2-Arylbenzofuran **3ia** was synthesized by Method A using 2-fluoro-5-methoxybenzofuran (**1i**, 28 mg, 0.17 mmol), *p*-xylene (**2a**, 0.10 mL, 0.84 mmol),  $\text{AlCl}_3$  (33 mg, 0.25 mmol), and dichloromethane (2.0 mL) at room temperature for 1 h. Purification by preparative thin-layer chromatography (hexane/ethyl acetate = 30/1) gave **3ia** (18 mg, 43%) as a colorless oil.

$^1\text{H}$  NMR (500 MHz,  $\text{CDCl}_3$ ):  $\delta$  2.37 (s, 3H), 2.51 (s, 3H), 3.84 (s, 3H), 6.80 (d,  $J = 0.8$  Hz, 1H), 6.88 (dd,  $J = 8.9, 2.6$  Hz, 1H), 7.05 (d,  $J = 2.6$  Hz, 1H), 7.07 (d,  $J = 7.8$  Hz, 1H), 7.16 (d,  $J = 7.8$  Hz, 1H), 7.40 (d,  $J = 8.9$  Hz, 1H), 7.64 (s, 1H).  $^{13}\text{C}$  NMR (126 MHz,  $\text{CDCl}_3$ ):  $\delta$  20.9, 21.4, 55.9, 103.2, 105.1, 111.4, 112.8, 128.5, 129.2, 129.65, 129.68, 131.2, 132.6, 135.5, 149.3, 155.9, 156.5. IR (neat):  $\nu$  2954, 2831, 1616, 1477, 1205, 1032, 808  $\text{cm}^{-1}$ . HRMS (EI):  $m/z$  Calcd. for  $\text{C}_{17}\text{H}_{16}\text{O}_2$   $[\text{M}]^+$ : 252.1150; Found: 252.1145.

### 2-(2,5-Dimethylphenyl)-6-methoxybenzofuran (3ja)

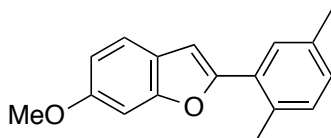

2-Arylbenzofuran **3ja** was synthesized by Method A using 2-fluoro-6-methoxybenzofuran (**1j**, 28 mg, 0.17 mmol), *p*-xylene (**2a**, 0.10 mL, 0.84 mmol), AlCl<sub>3</sub> (33 mg, 0.25 mmol), and dichloromethane (2.0 mL) at room temperature for 1 h. Purification by preparative thin-layer chromatography (hexane/ethyl acetate = 30/1) gave **3ja** (18 mg, 43%) as a colorless oil.

<sup>1</sup>H NMR (500 MHz, CDCl<sub>3</sub>): δ 2.40 (s, 3H), 2.53 (s, 3H), 3.88 (s, 3H), 6.82 (s, 1H), 6.89 (dd, *J* = 8.5, 2.3 Hz, 1H), 7.08–7.09 (m, 2H), 7.18 (d, *J* = 7.7 Hz, 1H), 7.47 (d, *J* = 8.5 Hz, 1H), 7.67 (s, 1H). <sup>13</sup>C NMR (126 MHz, CDCl<sub>3</sub>): δ 21.0, 21.5, 55.7, 95.7, 104.8, 111.8, 120.9, 122.6, 128.2, 128.8, 129.8, 131.2, 132.2, 135.5, 154.9, 155.3, 158.0. IR (neat): ν 2952, 2833, 1620, 1491, 1306, 1275, 1151, 1111, 812 cm<sup>-1</sup>. HRMS (EI): *m/z* Calcd for C<sub>17</sub>H<sub>16</sub>O<sub>2</sub> [M]<sup>+</sup>: 252.1150; Found: 252.1157. Elem. Anal. Calcd. for C<sub>17</sub>H<sub>16</sub>O<sub>2</sub>: C, 80.93; H, 6.39. Found: C, 80.80; H, 6.66.

### 2-(2,5-Dimethylphenyl)-7-methoxybenzofuran (3ka)

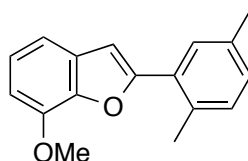

2-Arylbenzofuran **3ka** was synthesized by Method A using 2-fluoro-7-methoxybenzofuran (**1k**, 33 mg, 0.20 mmol), *p*-xylene (**2a**, 0.12 mL, 1.0 mmol), AlCl<sub>3</sub> (40 mg, 0.30 mmol), and dichloromethane (2.0 mL) at room temperature for 1 h. Purification by preparative thin-layer chromatography (hexane/ethyl acetate = 30/1) gave **3ka** (23 mg, 46%) as a colorless oil.

<sup>1</sup>H NMR (500 MHz, CDCl<sub>3</sub>): δ 2.38 (s, 3H), 2.53 (s, 3H), 4.05 (s, 3H), 6.82 (d, *J* = 7.8 Hz, 1H), 6.87 (s, 1H), 7.09 (d, *J* = 7.9 Hz, 1H), 7.14–7.21 (m, 3H), 7.71 (s, 1H). <sup>13</sup>C NMR (126 MHz, CDCl<sub>3</sub>): δ 20.9, 21.4, 56.2, 105.3, 106.6, 113.3, 123.4, 128.7, 129.3, 129.5, 130.9, 131.1, 132.6, 135.5, 143.6, 145.3, 155.8. IR (neat): ν 2966, 2839, 1493, 1321, 1271, 1198, 1101, 983, 808, 731 cm<sup>-1</sup>. HRMS (EI): *m/z* Calcd. for C<sub>17</sub>H<sub>16</sub>O<sub>2</sub> [M]<sup>+</sup>: 252.1150; Found: 252.1159.

### 2-(2,5-Dimethylphenyl)naphtho[2,1-*b*]furan (3la)

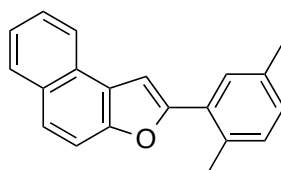

2-Arylnaphthofuran **3la** was synthesized by Method A using fluoronaphtho[2,1-*b*]furan (**1l**, 37 mg, 0.20 mmol), *p*-xylene (**2a**, 0.12 mL, 1.0 mmol), AlCl<sub>3</sub> (40 mg, 0.30 mmol), and dichloromethane

(2.0 mL) at room temperature for 1 h. Purification by preparative thin-layer chromatography (hexane/ethyl acetate = 30/1) gave **3la** (20 mg, 37%) as a yellow solid.

2-Arylnaphthofuran **3la** was also synthesized by Method B using fluoronaphtho[2,1-*b*]furan (**1l**, 37 mg, 0.20 mmol), *p*-xylene (**2a**, 0.50 mL, 4.1 mmol), and AlCl<sub>3</sub> (41.2 mg, 0.30 mmol) at room temperature for 1 h. Purification by preparative thin-layer chromatography (hexane/ethyl acetate = 30/1) gave **3la** (23 mg, 43%) as a yellow solid.

<sup>1</sup>H NMR (500 MHz, CDCl<sub>3</sub>): δ 2.39 (s, 3H), 2.59 (s, 3H), 7.08 (d, *J* = 6.9 Hz, 1H), 7.18 (d, *J* = 7.6 Hz, 1H), 7.34 (s, 1H), 7.46 (dd, *J* = 7.0, 6.9 Hz, 1H), 7.57 (dd, *J* = 7.0, 7.0 Hz, 1H), 7.67–7.73 (m, 3H), 7.93 (d, *J* = 8.1 Hz, 1H), 8.16 (d, *J* = 8.1 Hz, 1H). <sup>13</sup>C NMR (126 MHz, CDCl<sub>3</sub>): δ 21.0, 21.6, 104.0, 112.2, 123.4, 124.38, 124.44, 125.0, 126.2, 127.6, 128.4, 128.8, 129.1, 129.7, 130.3, 131.3, 132.4, 135.6, 151.8, 155.2. IR (neat): ν 3051, 2922, 2862, 1504, 1385, 1169, 993, 798, 771, 774 cm<sup>-1</sup>. HRMS (EI): *m/z* Calcd. for C<sub>20</sub>H<sub>16</sub>O [M]<sup>+</sup>: 272.1201, Found 272.1191.

#### 2-(2,4-Dimethylphenyl)benzo[*b*]thiophene (**3mb**)

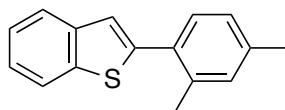

2-Arylbenzothiophene **3mb** was synthesized by Method A using 2-fluorobenzo[*b*]thiophene (**1m**, 30 mg, 0.20 mmol), *m*-xylene (**2b**, 0.12 mL, 1.0 mmol), AlCl<sub>3</sub> (41 mg, 0.31 mmol), and dichloromethane (2.0 mL) at -20 °C for 1 h. Purification by preparative thin-layer chromatography (hexane/ethyl acetate = 30/1) and GPC (chloroform) gave **3mb** (16 mg, 33%) as a colorless oil.

<sup>1</sup>H NMR (500 MHz, CDCl<sub>3</sub>): δ 2.36 (s, 3H), 2.43 (s, 3H), 7.06 (d, *J* = 7.8 Hz, 1H), 7.11 (s, 1H), 7.21 (s, 1H), 7.29–7.37 (m, 3H), 7.76 (d, *J* = 7.7 Hz, 1H), 7.82 (d, *J* = 8.0 Hz, 1H). <sup>13</sup>C NMR (126 MHz, CDCl<sub>3</sub>): δ 21.0, 21.1, 122.0, 122.7, 123.3, 123.9, 124.3, 126.7, 130.5, 131.2, 131.6, 136.2, 138.2, 140.0, 140.2, 143.6. IR (neat): ν 3060, 3012, 2952, 2918, 1493, 1456, 1435, 814, 744, 725 cm<sup>-1</sup>. HRMS (EI): *m/z* Calcd for C<sub>16</sub>H<sub>14</sub>S [M]<sup>+</sup>: 238.0816; Found: 238.0812.

#### 4-(Benzofuran-2-yl)benzene-1,2-diol (**3ag**, DHBF)

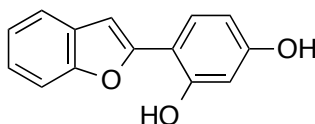

To a HFIP (12.0 mL) and dichloromethane (1.2 mL) solution of AlCl<sub>3</sub> (40 mg, 0.30 mmol) and resorcinol (**2g**, 110 mg, 1.0 mmol) was added 2-fluorobenzofuran (**1a**, 27 mg, 0.20 mmol) at room temperature. After stirring at room temperature for 2 h, aqueous NaOH (2 M, 3 mL) was added. To the mixture was added aqueous HCl (2 M, 3 mL), and organic materials were extracted with dichloromethane (3 mL) three times. The combined extracts were dried over Na<sub>2</sub>SO<sub>4</sub>. After removal

of the solvent under reduced pressure, the residue was purified by silica gel column chromatography (hexane/ethyl acetate = 4/1 to 2/1) to give **3ag** (22 mg, 49%) as a colorless crystal.

<sup>1</sup>H NMR (500 MHz, CDCl<sub>3</sub>): δ 4.97 (br s, 1H), 6.48–6.50 (m, 2H), 6.90 (d, *J* = 0.9 Hz, 1H), 7.22–7.28 (m, 2H), 7.35 (br s, 1H), 7.48–7.50 (m, 1H), 7.53–7.57 (m, 2H). <sup>13</sup>C NMR (126 MHz, CDCl<sub>3</sub>): δ 101.4, 104.0, 107.9, 108.7, 109.4, 110.9, 120.7, 123.4, 124.0, 128.6, 153.7, 154.6, 154.9, 157.5. IR (neat): ν 3494, 3379, 1624, 1599, 1506, 1446, 1304, 1242, 1151, 976, 916, 796, 735 cm<sup>-1</sup>. HRMS (ESI<sup>-</sup>): *m/z* Calcd for C<sub>14</sub>H<sub>9</sub>O<sub>3</sub> [M – H]<sup>-</sup>: 225.0552; Found: 225.0550.

#### 4-(7-Chlorobenzofuran-2-yl)phenol (**3nd**)

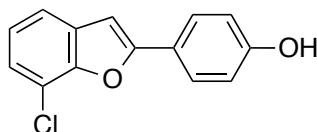

To a dichloromethane (2.0 mL) suspension of AlCl<sub>3</sub> (39 mg, 0.29 mmol) and phenol (**2d**, 96 mg, 1.0 mmol) was added 7-chloro-2-fluorobenzofuran (**1n**, 34 mg, 0.20 mmol) at room temperature. After stirring at room temperature for 1 h, aqueous NaOH (2 M, 1 mL) was added. To the mixture was added aqueous HCl (2 M, 1 mL), and organic materials were extracted with dichloromethane (1 mL) three times. The combined extracts were dried over Na<sub>2</sub>SO<sub>4</sub>. After removal of the solvent under reduced pressure, the residue was purified by preparative thin-layer chromatography (hexane/ethyl acetate = 4/1) to give **3nd** (27 mg, 54%) as a colorless crystal.

<sup>1</sup>H NMR (500 MHz, CDCl<sub>3</sub>): δ 6.87 (s, 1H), 6.91 (d, *J* = 8.8 Hz, 2H), 7.12 (dd, *J* = 7.8, 7.8 Hz, 1H), 7.22 (dd, *J* = 7.8, 1.0 Hz, 1H), 7.42 (dd, *J* = 7.8, 1.0 Hz, 1H), 7.77 (d, *J* = 8.8 Hz, 2H). <sup>13</sup>C NMR (126 MHz, CDCl<sub>3</sub>): δ 100.1, 115.8, 116.4, 119.1, 122.9, 123.7, 123.9, 126.9, 131.1, 150.4, 156.4, 156.8. IR (neat): ν 3336, 1502, 1473, 1423, 1290, 1244, 1236, 906, 835, 808, 735 cm<sup>-1</sup>. HRMS (ESI<sup>-</sup>): *m/z* Calcd for C<sub>14</sub>H<sub>8</sub>ClO<sub>2</sub> [M – H]<sup>-</sup>: 243.0213; Found: 243.0210.

### 3. Orthogonal Synthesis of Eupomatenoid **6** (**4**)

#### 5-Bromo-2-fluoro-3-methylbenzofuran (**1o**)<sup>18</sup>

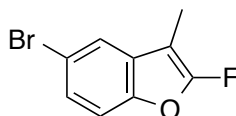

To a 1,2-dichloroethane (20 mL) and H<sub>2</sub>O (10 mL) suspension of Selectfluor (4.25 g, 12.0 mmol) and KF (1.39 g, 23.9 mmol) was added 5-bromo-3-methylbenzofuran-2-carboxylic acid (1.47 g, 5.76 mmol) at room temperature. After stirring at 70 °C for 12 h, H<sub>2</sub>O (20 mL) was added, and organic materials were extracted with dichloromethane (20 mL) three times. The combined extracts were dried over Na<sub>2</sub>SO<sub>4</sub>. After removal of the solvent under reduced pressure, the residue was purified by silica gel column chromatography (hexane) to give **1o** (1.07 g, 81%) as a colorless oil.

<sup>1</sup>H NMR (500 MHz, CDCl<sub>3</sub>): δ 2.06 (d, *J*<sub>HF</sub> = 1.7 Hz, 3H) 7.20 (d, *J* = 8.6 Hz, 1H), 7.32 (dd, *J* = 8.6, 2.1 Hz, 1H), 7.51 (d, *J* = 2.1 Hz, 1H). <sup>13</sup>C NMR (126 MHz, CDCl<sub>3</sub>): δ 5.4, 86.1 (d, *J*<sub>CF</sub> = 13 Hz), 112.2, 116.4, 121.8 (d, *J*<sub>CF</sub> = 6 Hz), 126.1 (d, *J*<sub>CF</sub> = 4 Hz), 131.6, 145.6, 157.4 (d, *J*<sub>CF</sub> = 280 Hz). <sup>19</sup>F NMR (470 MHz, CDCl<sub>3</sub>): δ 44.7 (s). IR (neat): ν 2931, 1676, 1454, 1442, 1354, 1194, 796, 744, 623, 519 cm<sup>-1</sup>. HRMS (EI): *m/z* Calcd. for C<sub>9</sub>H<sub>6</sub><sup>79</sup>BrFO [M]<sup>+</sup>: 227.9586; Found: 227.9581.

#### 4-(5-Bromo-3-methylbenzofuran-2-yl)phenol (**3od**)

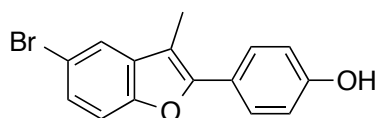

To a 1,2-dichloroethane (4.0 mL) suspension of AlCl<sub>3</sub> (70 mg, 0.52 mmol) and phenol (**2d**, 189 mg, 2.0 mmol) was added 5-bromo-3-methyl-2-fluorobenzofuran (**1o**, 93 mg, 0.40 mmol) at room temperature. After stirring at 80 °C for 4 h, aqueous NaOH (2 M, 3 mL) was added. To the mixture was added aqueous HCl (2 M, 3 mL), and organic materials were extracted with dichloromethane (3 mL) three times. The combined extracts were dried over Na<sub>2</sub>SO<sub>4</sub>. After removal of the solvent under reduced pressure, the residue was purified by silica gel column chromatography (hexane/diethyl ether = 5/1) to give **3od** (87 mg, 71%) as a colorless crystal.

<sup>1</sup>H NMR (500 MHz, CDCl<sub>3</sub>): δ 2.37 (s, 3H), 5.00 (s, 1H), 6.93 (d, *J* = 8.8 Hz, 2H) 7.30 (d, *J* = 8.6 Hz, 1H), 7.33 (dd, *J* = 8.6, 1.9 Hz, 1H), 7.60 (d, *J* = 1.9 Hz, 1H), 7.66 (d, *J* = 8.8 Hz, 2H). <sup>13</sup>C NMR (126 MHz, CDCl<sub>3</sub>): δ 9.3, 109.2, 112.2, 115.4, 115.7, 121.8, 123.8, 126.6, 128.5, 133.3, 152.0, 152.3, 155.6.

Spectral data for this compound showed good agreement with literature data.<sup>17</sup>

#### Eupomatenoid **6** (**4**)

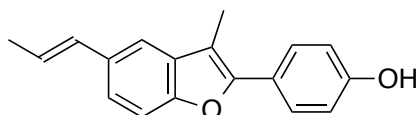

A *t*-BuOH (0.5 mL) and H<sub>2</sub>O (0.1 mL) suspension of 4-(5-bromo-3-methylbenzofuran-2-yl)phenol (**3od**, 16 mg, 0.051 mmol), potassium (*E*)-propenyltetrafluoroborate (9.9 mg, 0.067 mmol), Pd(PPh<sub>3</sub>)<sub>4</sub> (2.9 mg, 2.5 μmol), and Cs<sub>2</sub>CO<sub>3</sub> (52 mg, 0.16 mmol) was degassed by using freeze-pump-thaw method three times. After stirring at 80 °C for 16 h, H<sub>2</sub>O (2 mL) was added, and organic materials were extracted with dichloromethane (2 mL) three times. The combined extracts were dried over Na<sub>2</sub>SO<sub>4</sub>. After removal of the solvent under reduced pressure, the residue was purified by preparative thin-layer chromatography (hexane/ether = 5/1) to give **4** (13 mg, 99%) as a colorless crystal.

<sup>1</sup>H NMR (500 MHz, CDCl<sub>3</sub>): δ 1.91 (dd, *J* = 6.6, 1.7 Hz, 3H), 2.42 (s, 3H), 4.92 (s, 1H), 6.23 (dq, *J* = 15.5, 6.6 Hz, 1H), 6.51 (dd, *J* = 15.5, 1.7 Hz, 1H), 6.94 (d, *J* = 8.8 Hz, 2H), 7.27 (dd, *J* = 8.4, 1.7 Hz, 1H), 7.36 (d, *J* = 8.4 Hz, 1H), 7.43 (d, *J* = 1.7 Hz, 1H), 7.68 (d, *J* = 8.8 Hz, 2H). <sup>13</sup>C NMR (126 MHz, CDCl<sub>3</sub>): δ 9.4, 18.5, 109.8, 110.6, 115.6, 116.1, 122.2, 124.2, 124.4, 128.3, 131.3, 131.5,



132.6, 151.1, 152.9, 155.3.

Spectral data for this compound showed good agreement with literature data.<sup>19</sup> The structure of **4** was also confirmed by X-ray diffraction analysis (Figure S1 and Table S1).

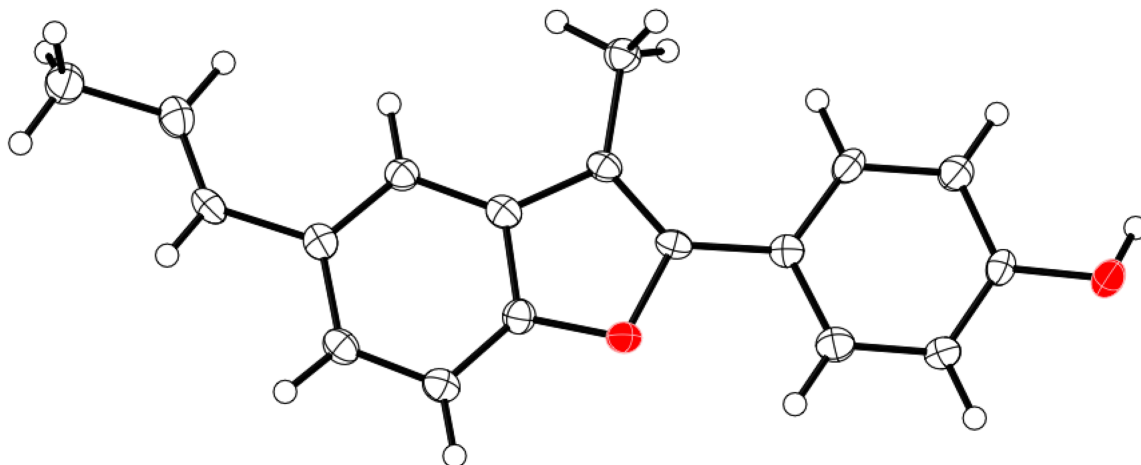

**Figure S1.** ORTEP Drawing of **4** with 50% Ellipsoid Probability

**Table S1.** Crystal Data Collection Parameters for **4**

| compound                                              | <b>4</b>                                       |
|-------------------------------------------------------|------------------------------------------------|
| formula                                               | C <sub>18</sub> H <sub>16</sub> O <sub>2</sub> |
| crystal system                                        | Orthorhombic                                   |
| space group                                           | <i>Pbca</i>                                    |
| $R$ , $R_w$ ( $I > 2\sigma(I)$ )                      | 0.0884, 0.1791                                 |
| $R1$ , $wR2$ (all data)                               | 0.1546, 0.2040                                 |
| GOF on $F^2$                                          | 1.079                                          |
| $a$ (Å)                                               | 4.768(2)                                       |
| $b$ (Å)                                               | 18.775(9)                                      |
| $c$ (Å)                                               | 31.234(15)                                     |
| $\alpha$ (deg)                                        | 90                                             |
| $\beta$ (deg)                                         | 90                                             |
| $\gamma$ (deg)                                        | 90                                             |
| $V$ (Å <sup>3</sup> )                                 | 2796(2)                                        |
| $Z$                                                   | 8                                              |
| $T$ (K)                                               | 120(2)                                         |
| crystal size (mm)                                     | 0.47, 0.35, 0.01                               |
| $D_{\text{calcd}}$ (g/cm <sup>3</sup> )               | 1.256                                          |
| $2\theta_{\text{min}}$ , $2\theta_{\text{max}}$ (deg) | 2.60, 50.00                                    |

## 4. Mechanistic Studies

### Control Experiments Using **1a** and **2a-d<sub>10</sub>**

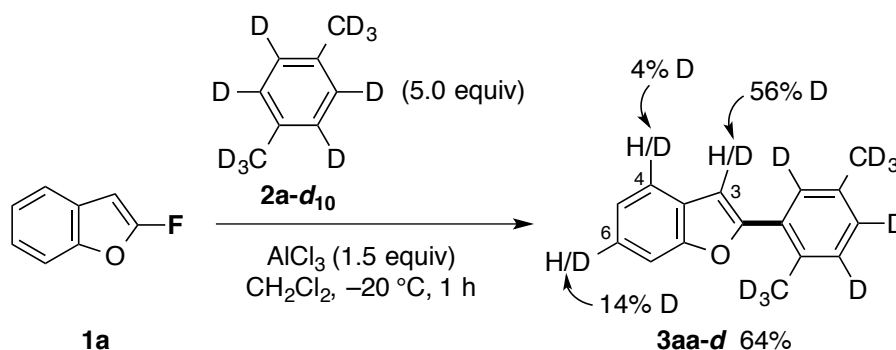

To a dichloromethane (2.0 mL) suspension of  $\text{AlCl}_3$  (41 mg, 0.31 mmol) and *p*-xylene-*d*<sub>10</sub> (**2a-d<sub>10</sub>**, 0.12 mL, 1.0 mmol) was added 2-fluorobenzofuran (**1a**, 28 mg, 0.20 mmol) at  $-20\text{ }^\circ\text{C}$ . After stirring at the same temperature for 1 h, aqueous NaOH (2 M, 1 mL) was added and allowed to warm to room temperature. To the mixture was added aqueous HCl (2 M, 1 mL), and organic materials were extracted with dichloromethane (2 mL) three times. The combined extracts were dried over  $\text{Na}_2\text{SO}_4$ . After removal of the solvent under reduced pressure, the residue was purified by preparative thin-layer chromatography (hexane/ethyl acetate = 30/1) to give **3aa** (30 mg, 64%) as a colorless oil. The ratio of deuterium incorporation of each position was determined by  $^1\text{H}$  NMR spectroscopy.

### Control Experiments Using **1a**, **2a**, and **2a-d<sub>10</sub>**

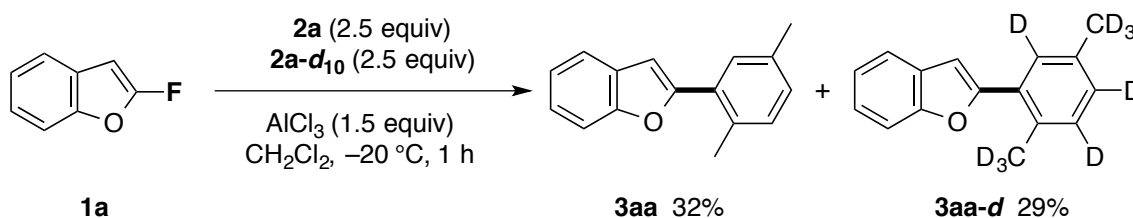

To a dichloromethane (2.0 mL) suspension of  $\text{AlCl}_3$  (40 mg, 0.30 mmol), *p*-xylene (**2a**, 62  $\mu\text{L}$ , 0.50 mmol), and *p*-xylene-*d*<sub>10</sub> (**2a-d<sub>10</sub>**, 61  $\mu\text{L}$ , 0.50 mmol) was added 2-fluorobenzofuran (**1a**, 27 mg, 0.20 mmol) at  $-20\text{ }^\circ\text{C}$ . After stirring at the same temperature for 1 h, aqueous NaOH (2 M, 1 mL) was added and allowed to warm to room temperature. To the mixture was added aqueous HCl (2 M, 1 mL), and organic materials were extracted with dichloromethane (2 mL) three times. The combined extracts were dried over  $\text{Na}_2\text{SO}_4$ . After removal of the solvent under reduced pressure, the yields of **3aa** and **3aa-d** were determined by  $^1\text{H}$  NMR spectroscopy using  $\text{CH}_2\text{Br}_2$  as an internal standard.

## Control Experiments Using **3aa** and **2a-d<sub>10</sub>**

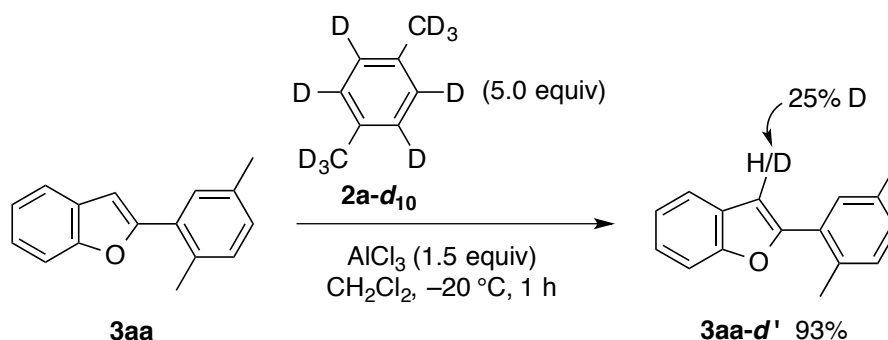

To a dichloromethane (1.0 mL) suspension of  $\text{AlCl}_3$  (20 mg, 0.15 mmol) and *p*-xylene-*d*<sub>10</sub> (**2a-d<sub>10</sub>**, 61  $\mu\text{L}$ , 0.50 mmol) was added 2-arylbenzofuran **3aa** (22 mg, 0.10 mmol) at  $-20\text{ }^\circ\text{C}$ . After stirring at the same temperature for 1 h, aqueous NaOH (2 M, 1 mL) was added and allowed to warm to room temperature. To the mixture was added aqueous HCl (2 M, 1 mL), and organic materials were extracted with dichloromethane (2 mL) three times. The combined extracts were dried over  $\text{Na}_2\text{SO}_4$ . After removal of the solvent under reduced pressure, the yield of **3aa-d'** and the ratio of deuterium incorporation of each position was determined by  $^1\text{H}$  NMR spectroscopy.

## Effect of Halogens on the 2-Positions in Benzofurans

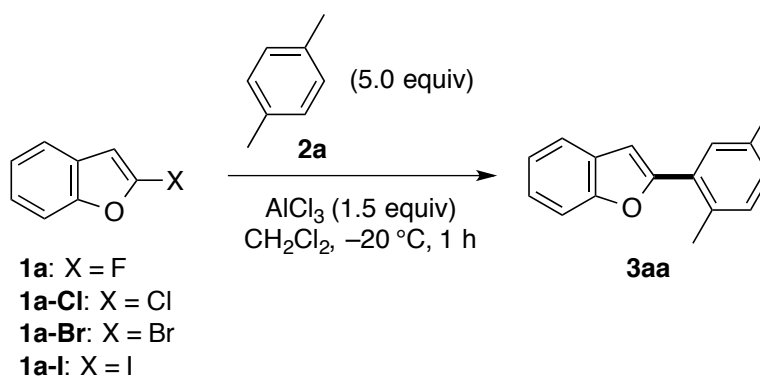

To a dichloromethane (2.0 mL) suspension of  $\text{AlCl}_3$  (1.5 equiv) and *p*-xylene (**2a**, 5.0 equiv) was added 2-halobenzofuran (**1a**: X = F; **1a-Cl**: X = Cl; **1a-Br**: X = Br; **1a-I**: X = I) at  $-20\text{ }^\circ\text{C}$ . After stirring at the same temperature for 1 h, aqueous NaOH (2 M, 1 mL) was added and allowed to warm to room temperature. To the mixture was added aqueous HCl (2 M, 1 mL), and organic materials were extracted with dichloromethane (2 mL) three times. The combined extracts were dried over  $\text{Na}_2\text{SO}_4$ . After removal of the solvent under reduced pressure, the yield of **3aa** was determined by  $^1\text{H}$  NMR spectroscopy using  $\text{CH}_2\text{Br}_2$  as an internal standard.

## 5. Reaction Mechanisms

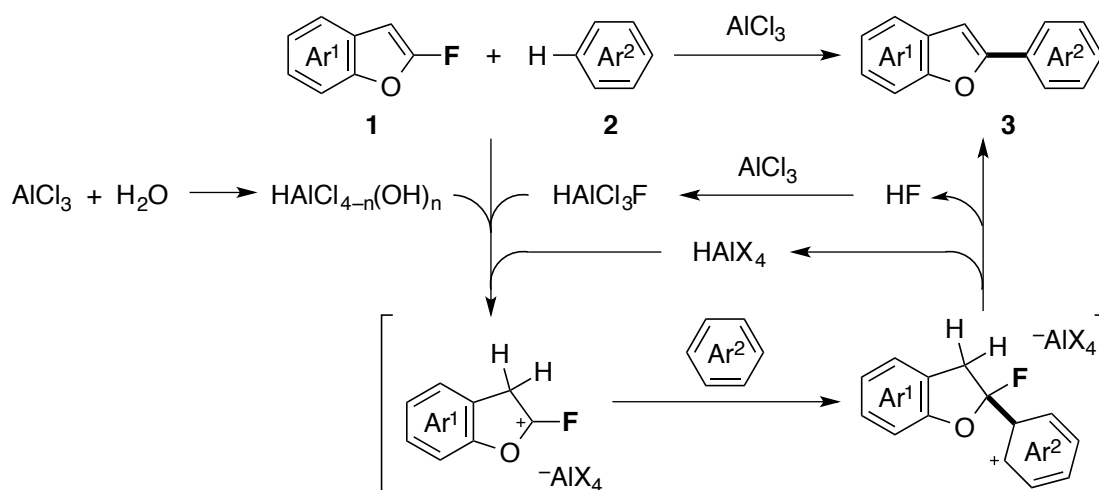

Figure S2. Plausible Mechanism

## 6. References

- (1) C. Kabuto, S. Akine, S. Nemoto and E. Kwon, *J. Cryst. Soc. Jpn.*, 2009, **51**, 218–224.
- (2) A. Altomare, M. C. Burla, M. Camalli, G. L. Cascarano, C. Giacovazzo, A. Guagliardi, A. G. Moliterni, G. Polidori and R. Spagna, *J. Appl. Crystallogr.*, 1999, **32**, 115–119.
- (3) G. M. Sheldrick, *Programs for Crystal Structure Analysis (Release 972)*; Institut für Anorganische Chemie der Universität: Göttingen, Germany, 1998.
- (4) R. Morioka, T. Fujita and J. Ichikawa, *Helv. Chim. Acta*, 2020, **103**, e2000159.
- (5) J. Ichikawa, Y. Wada, T. Okauchi and T. Minami, *Chem. Commun.*, 1997, 1537–1538.
- (6) R. Hofsäß, D. Rombach and H.-A. Wagenknecht, *Synlett*, 2017, **28**, 1422–1426.
- (7) J. Li, T. S. Rush III, W. Li, D. DeVincentis, X. Du, Y. Hu, J. R. Thomason, J. S. Xiang, J. S. Skotnicki, S. Tam, K. M. Cunningham, P. S. Chockalingam, E. A. Morris and J. I. Levin, *Bioorg. Med. Chem. Lett.*, 2005, **15**, 4961–4966.
- (8) N. D. Adams, C. J. Aquino, J. M. Ghergurovich, D. L. Musso, C. A. Parrish and A. J. Reif, WO2012037299, 2012.
- (9) J. Yang, S. Liu, J.-F. Zheng and J. S. Zhou, *Eur. J. Org. Chem.*, 2012, 6248–6249.
- (10) L. Lu, H. Yan, P. Sun, Y. Zhu, H. Yang, D. Liu, G. Rong and J. Mao, *Eur. J. Org. Chem.*, 2013, 1644–1648.
- (11) M.-L. Yao, M. S. Reddy, L. Yong, I. Walfish, D. W. Blevins and G. W. Kabalka, *Org. Lett.*, 2010, **12**, 700–703.
- (12) T. T. B. Nguyen, T. Lomberget, N. C. Tran, E. Colomb, L. Nachtegaele, S. Thoret, J. Dubois, J. Guillaume, R. Abdayem, M. Haftek and R. Barret, *Bioorg. Med. Chem. Lett.*, 2012, **22**, 7227–7231.
- (13) H. Naka, M. Uchiyama, Y. Matsumoto, A. E. H. Wheatley, M. McPartlin, J. V. Morey and Y. Kondo, *J. Am. Chem. Soc.*, 2007, **129**, 1921–1930.

- (14) T. A. Dwight, N. R. Rue, D. Charyk, R. Josselyn and B. DeBoef, *Org. Lett.*, 2007, **9**, 3137–3139.
- (15) Y. Li, L. Cheng, X.Liu, B. Li and N. Sun, *Beilstein J. Org. Chem.*, 2014, **10**, 2886–2891.
- (16) X.-F. Duan, J. Zeng, Z.-B. Zhang and G.-F. Zi, *J. Org. Chem.*, 2007, **72**, 10283–10286.
- (17) N. Takeda, O. Miyata and T. Naito, *Eur. J. Org. Chem.*, 2007, 1491–1509.
- (18) X. Yuan, J.-F. Yao and Z.-Y. Tang, *Org. Lett.*, 2017, **19**, 1410–1413.
- (19) O. Miyata, N. Takeda and T. Naito, *Org. Lett.*, 2004, **6**, 1761–1763.

# 7. <sup>1</sup>H, <sup>13</sup>C, and <sup>19</sup>F NMR Charts

## 2-(2,5-Dimethylphenyl)benzofuran (3aa)

<sup>1</sup>H NMR (500 MHz, CDCl<sub>3</sub>)

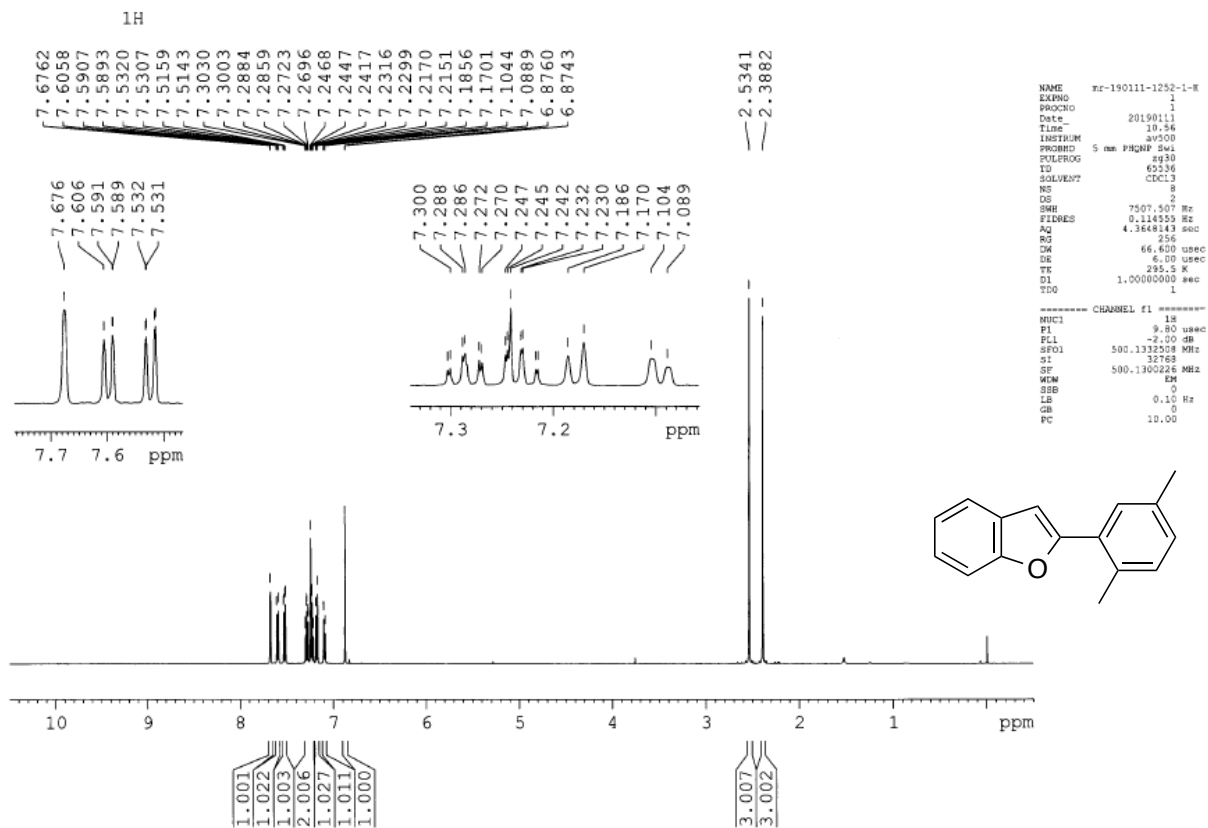

<sup>13</sup>C NMR (126 MHz, CDCl<sub>3</sub>)

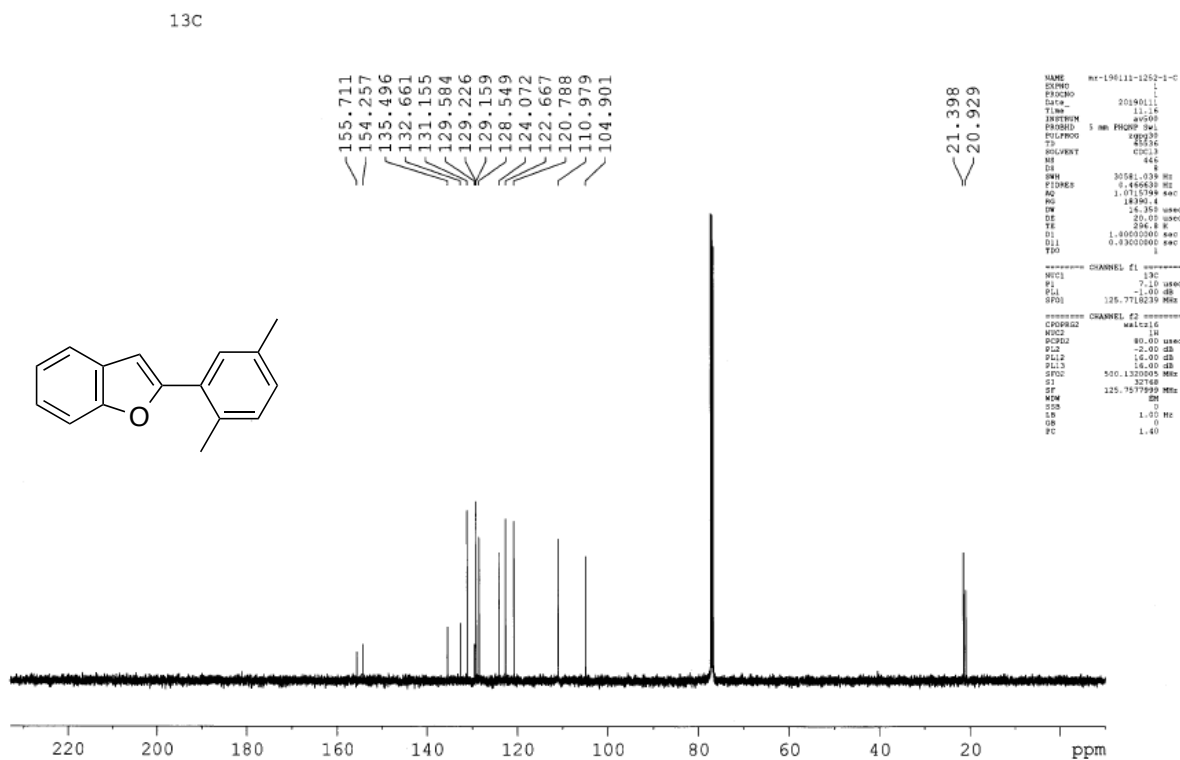

# 2-(2,4-Dimethylphenyl)benzofuran (3ab)

<sup>1</sup>H NMR (500 MHz, CDCl<sub>3</sub>)

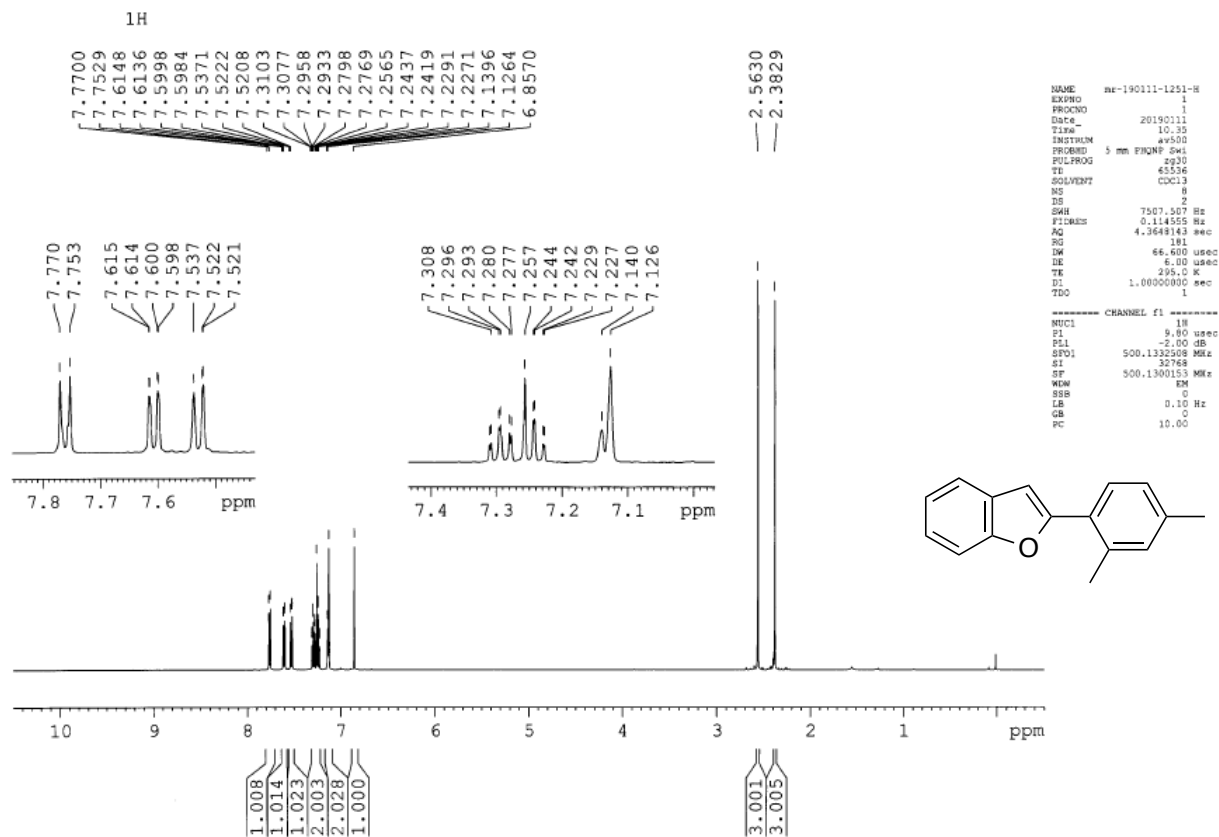

<sup>13</sup>C NMR (126 MHz, CDCl<sub>3</sub>)

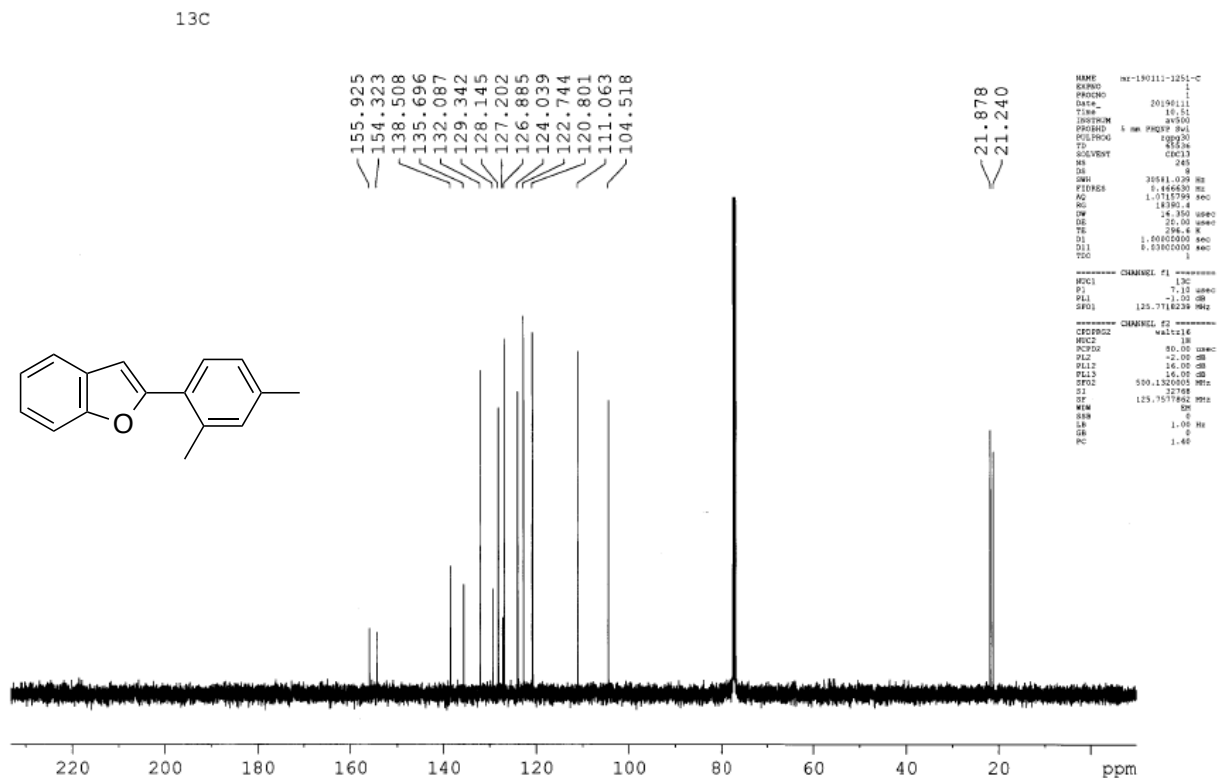

# 2-(Thiophen-2-yl)benzofuran (3ac)

<sup>1</sup>H NMR (500 MHz, CDCl<sub>3</sub>)

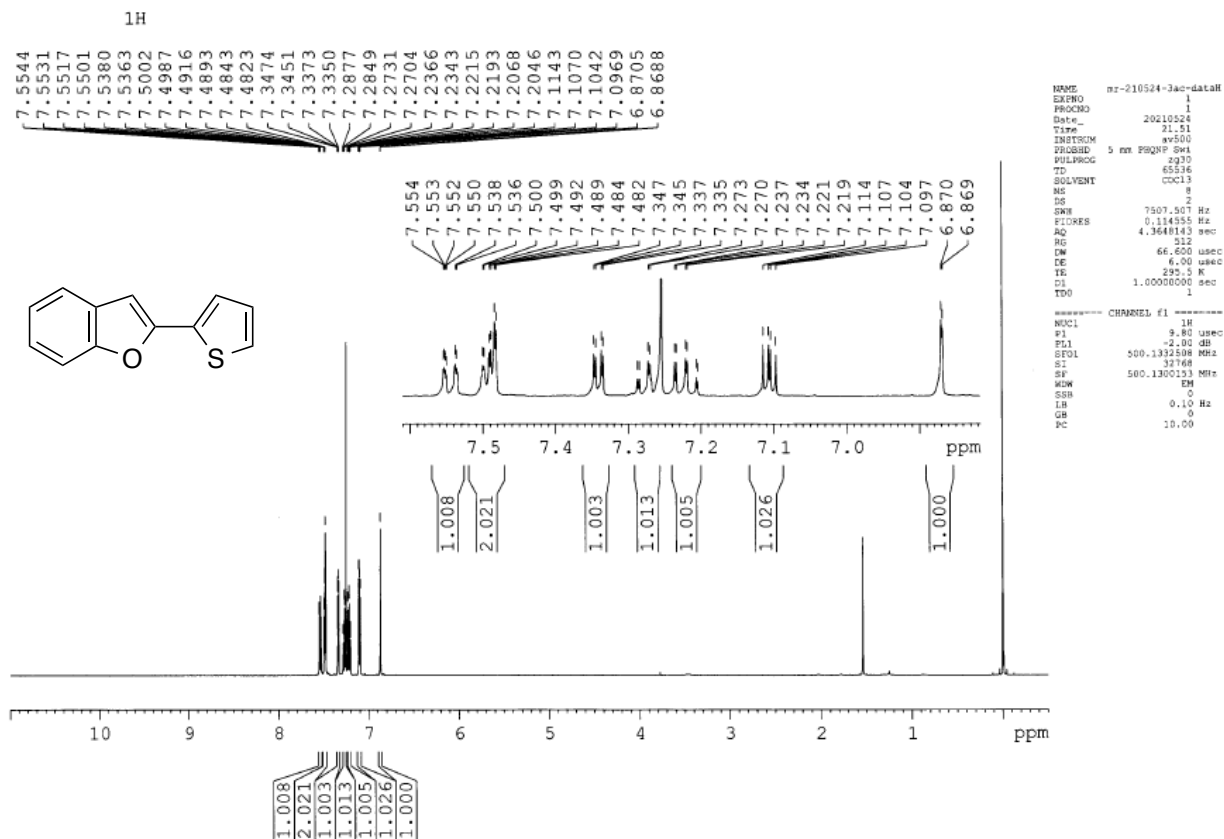

<sup>13</sup>C NMR (126 MHz, CDCl<sub>3</sub>)

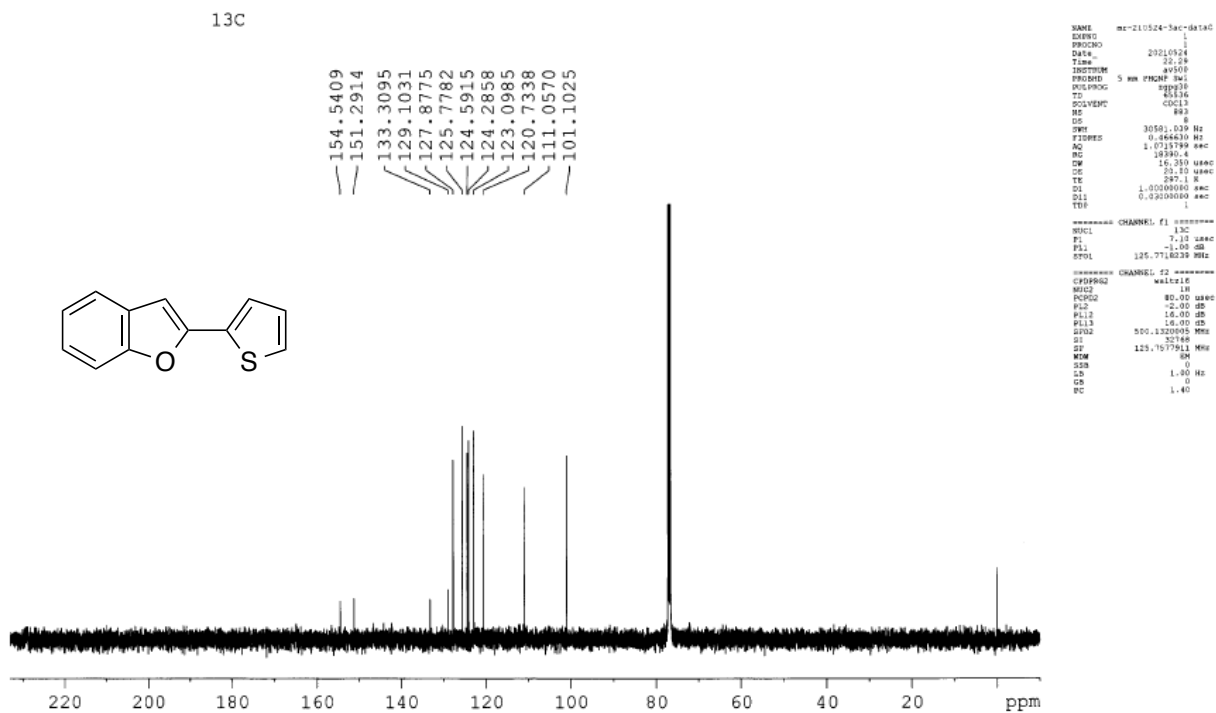



# 4-(Benzofuran-2-yl)phenol (3ad)

<sup>1</sup>H NMR (500 MHz, CDCl<sub>3</sub>)

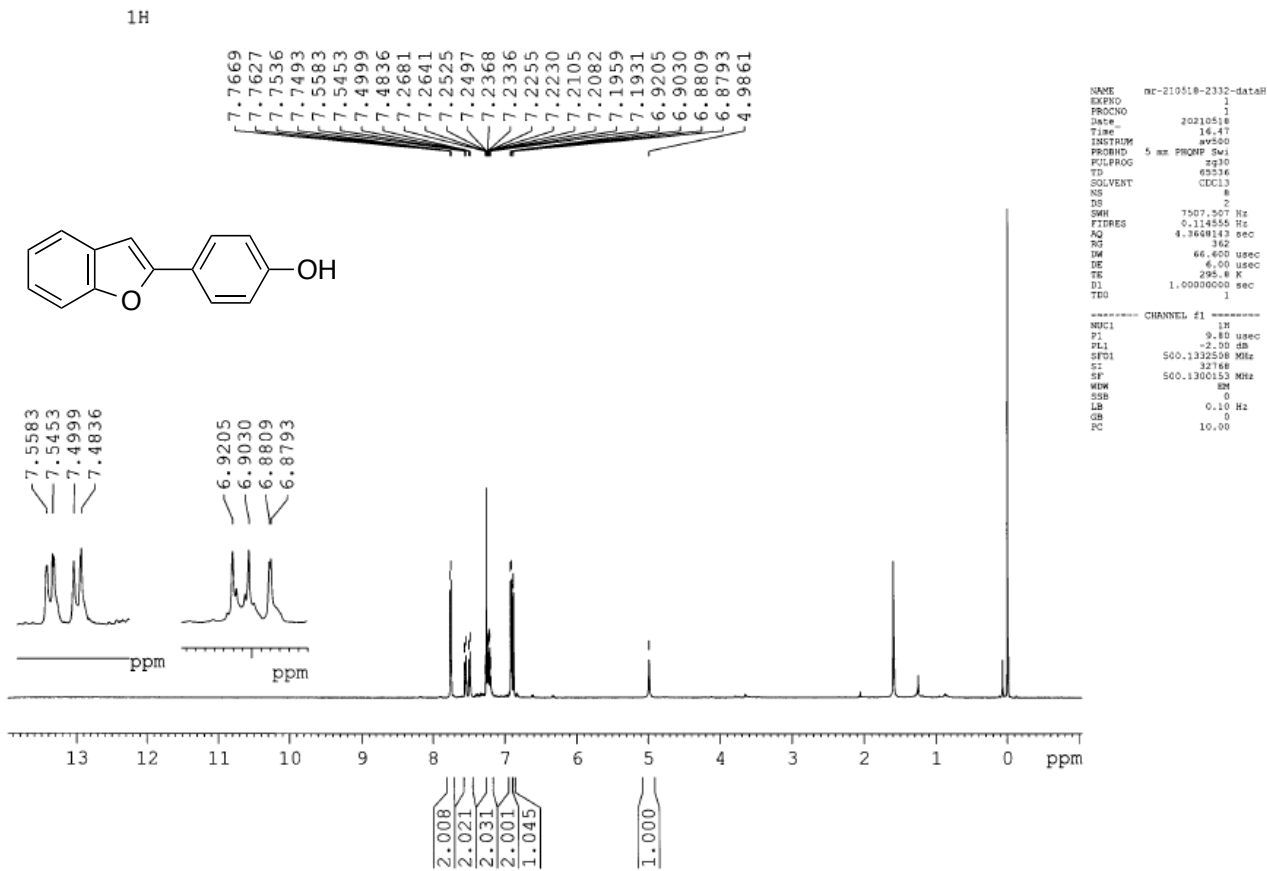

<sup>13</sup>C NMR (126 MHz, CDCl<sub>3</sub>)

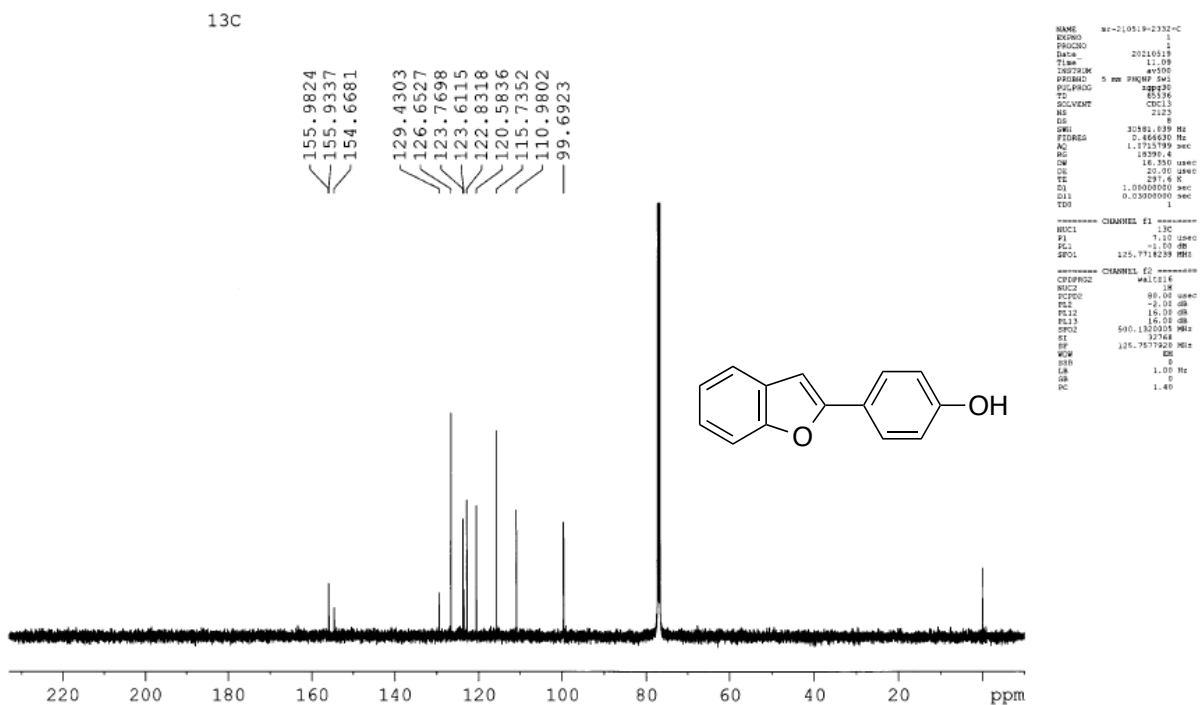

## 2-(2,4-Dimethoxyphenyl)benzofuran (3ae)

<sup>1</sup>H NMR (500 MHz, CDCl<sub>3</sub>)

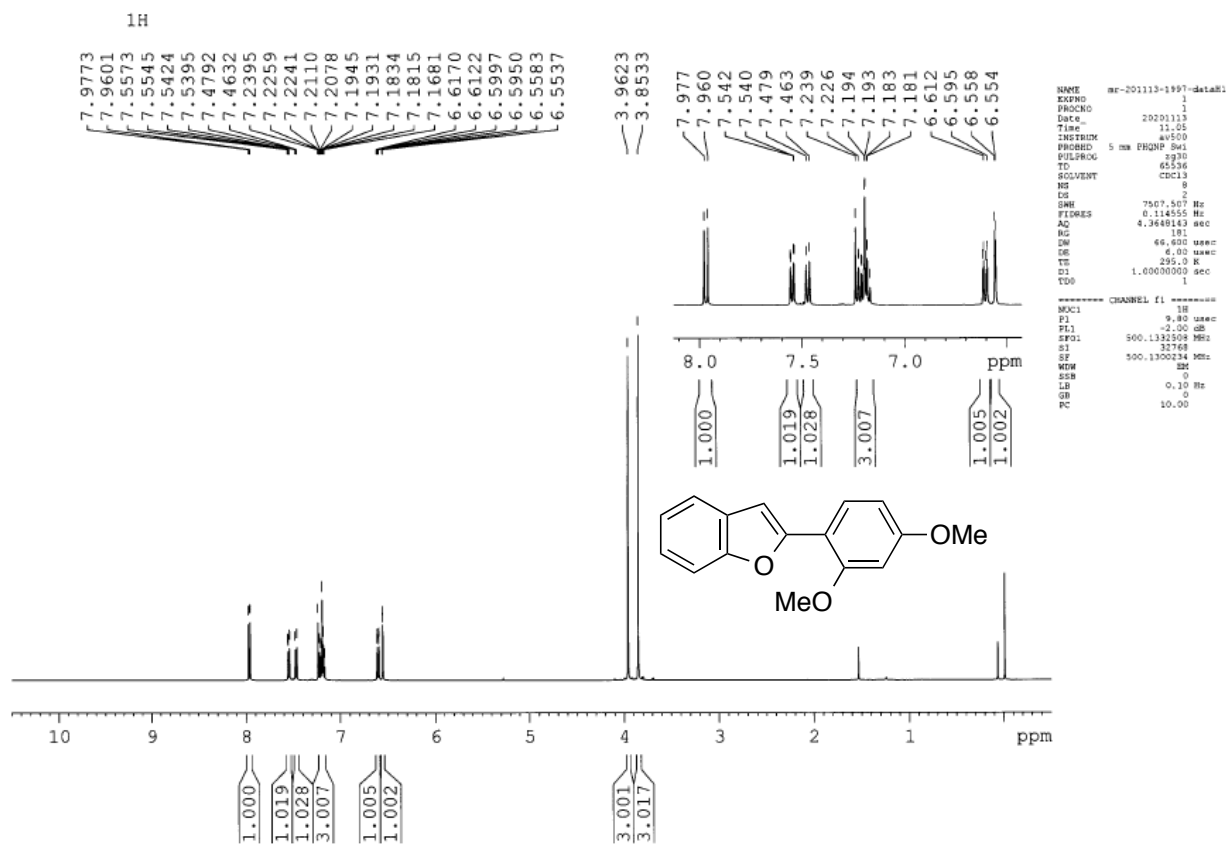

<sup>13</sup>C NMR (126 MHz, CDCl<sub>3</sub>)

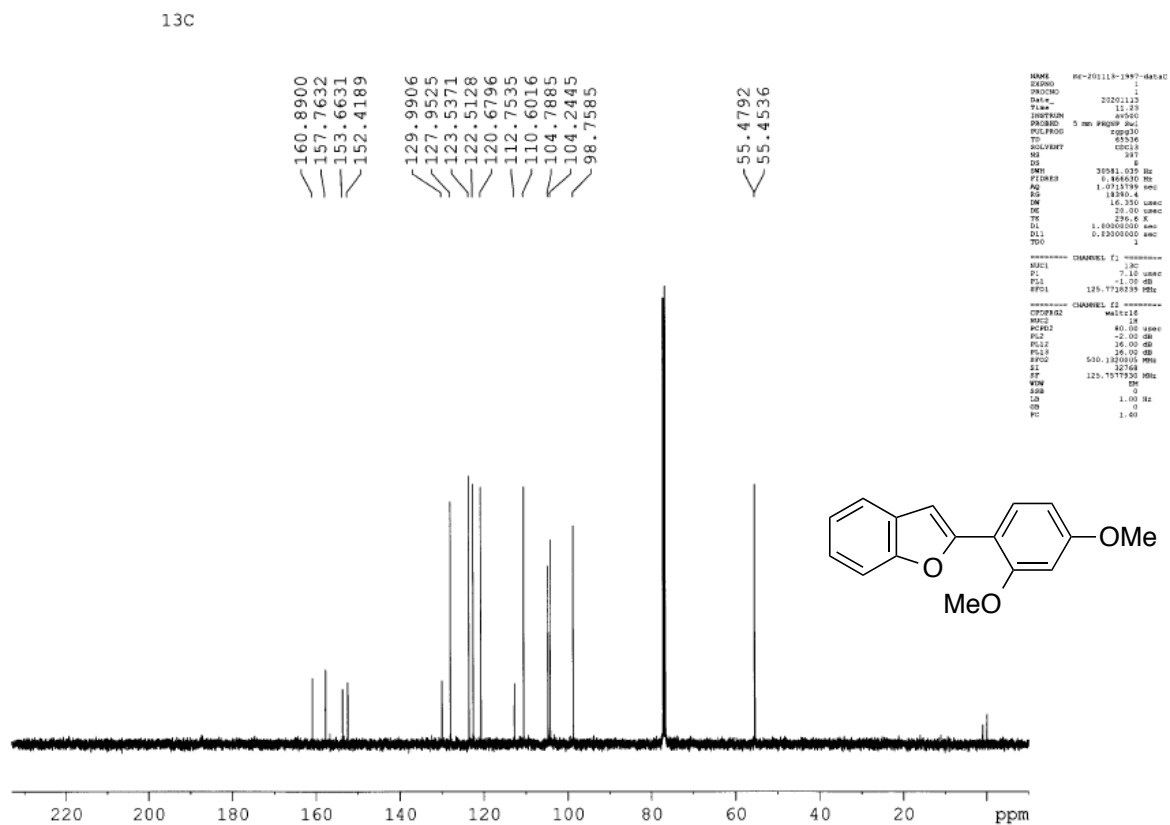

### 3-Butyl-2-(2,5-dimethylphenyl)benzofuran (3ba)

$^1\text{H}$  NMR (500 MHz,  $\text{CDCl}_3$ )

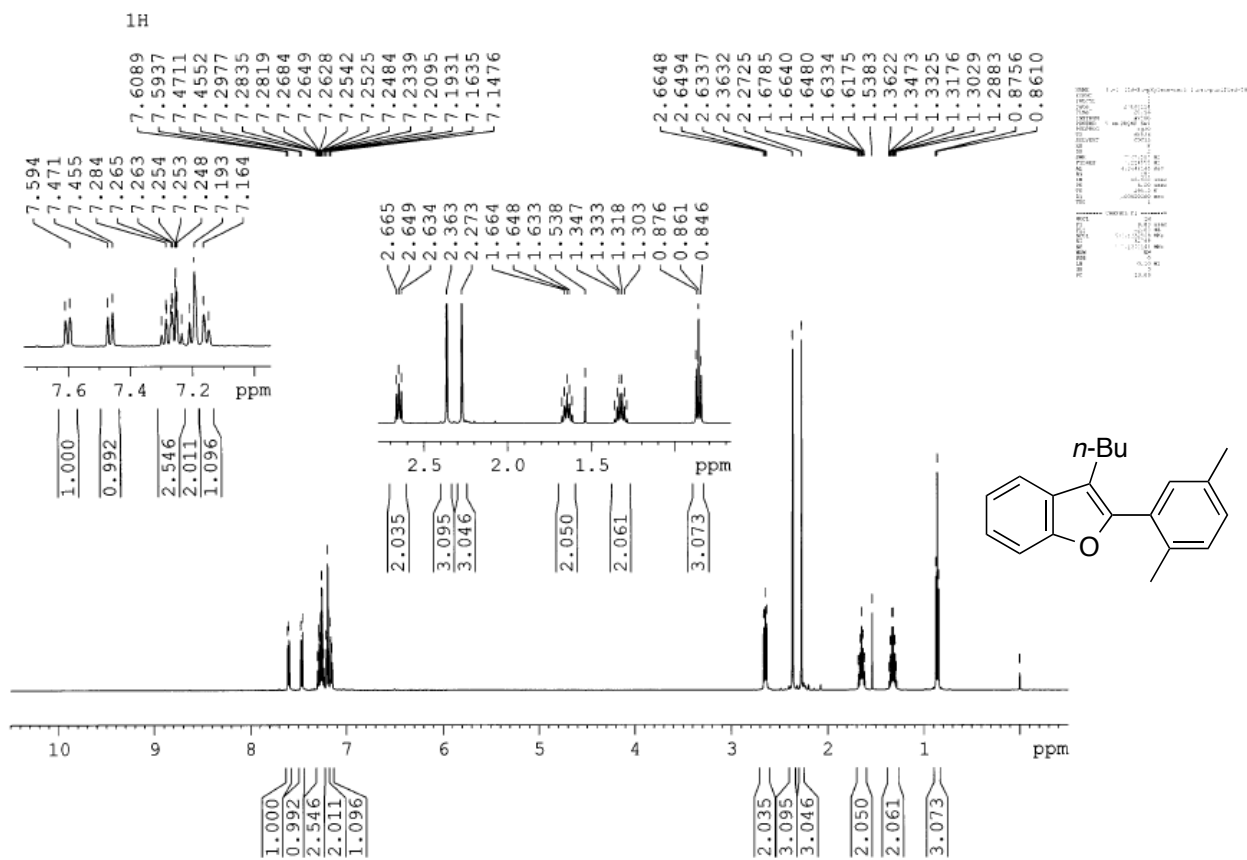

$^{13}\text{C}$  NMR (126 MHz,  $\text{CDCl}_3$ )

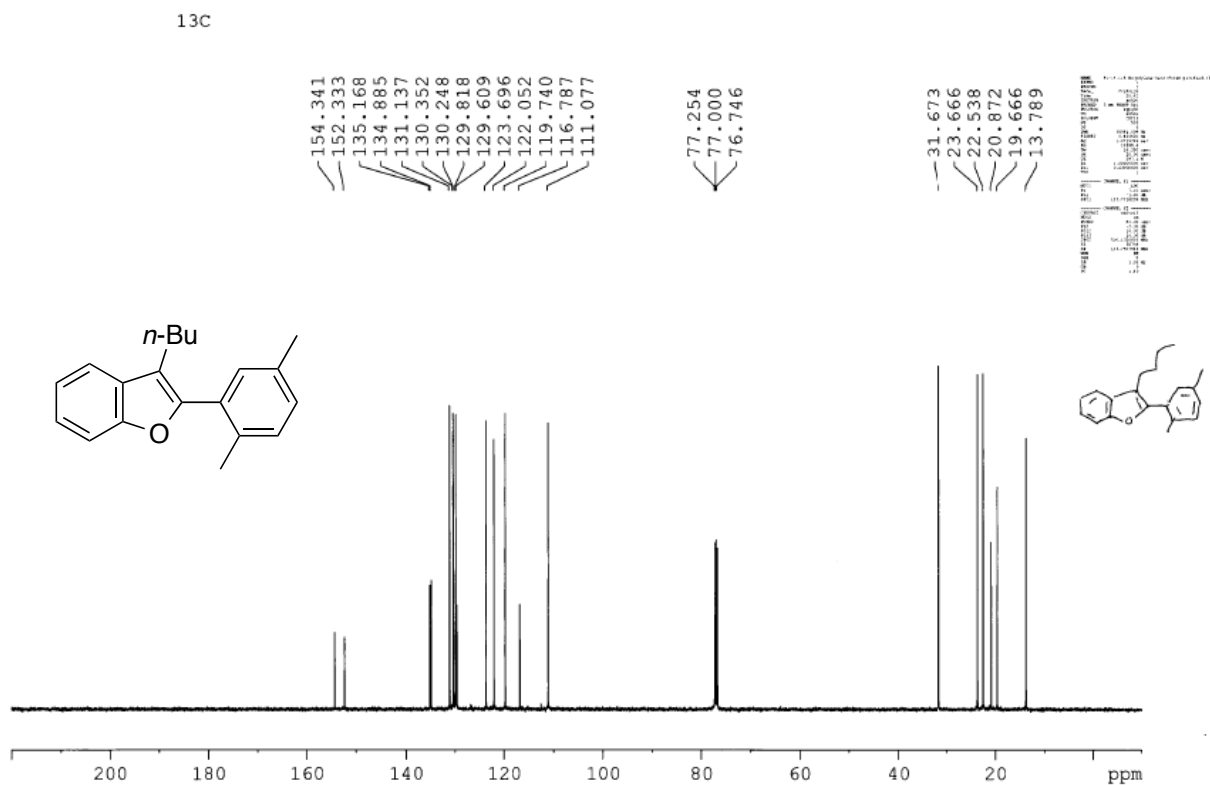

### 3-Butyl-2-(2,4-dimethylphenyl)benzofuran (3bb)

<sup>1</sup>H NMR (500 MHz, CDCl<sub>3</sub>)

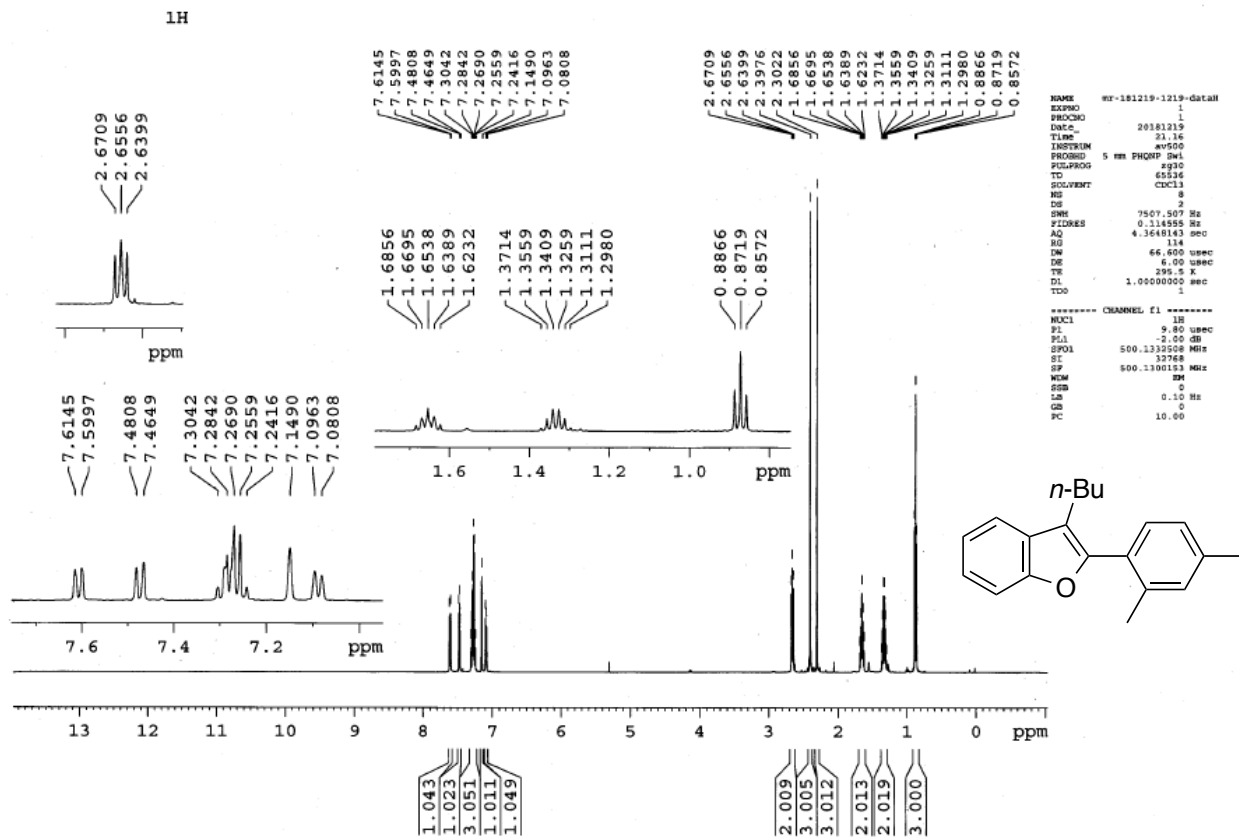

<sup>13</sup>C NMR (126 MHz, CDCl<sub>3</sub>)

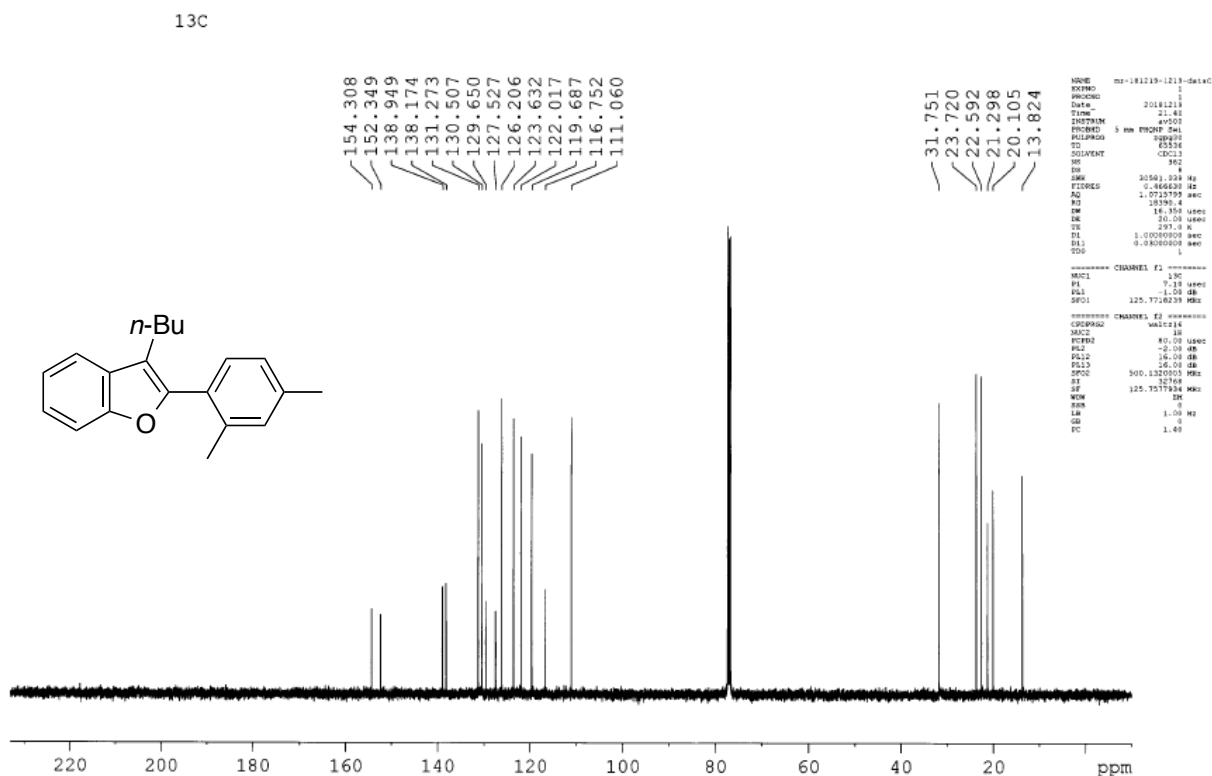

### 3-Butyl-2-(thiophen-2-yl)benzofuran (3bc)

$^1\text{H}$  NMR (500 MHz,  $\text{CDCl}_3$ )

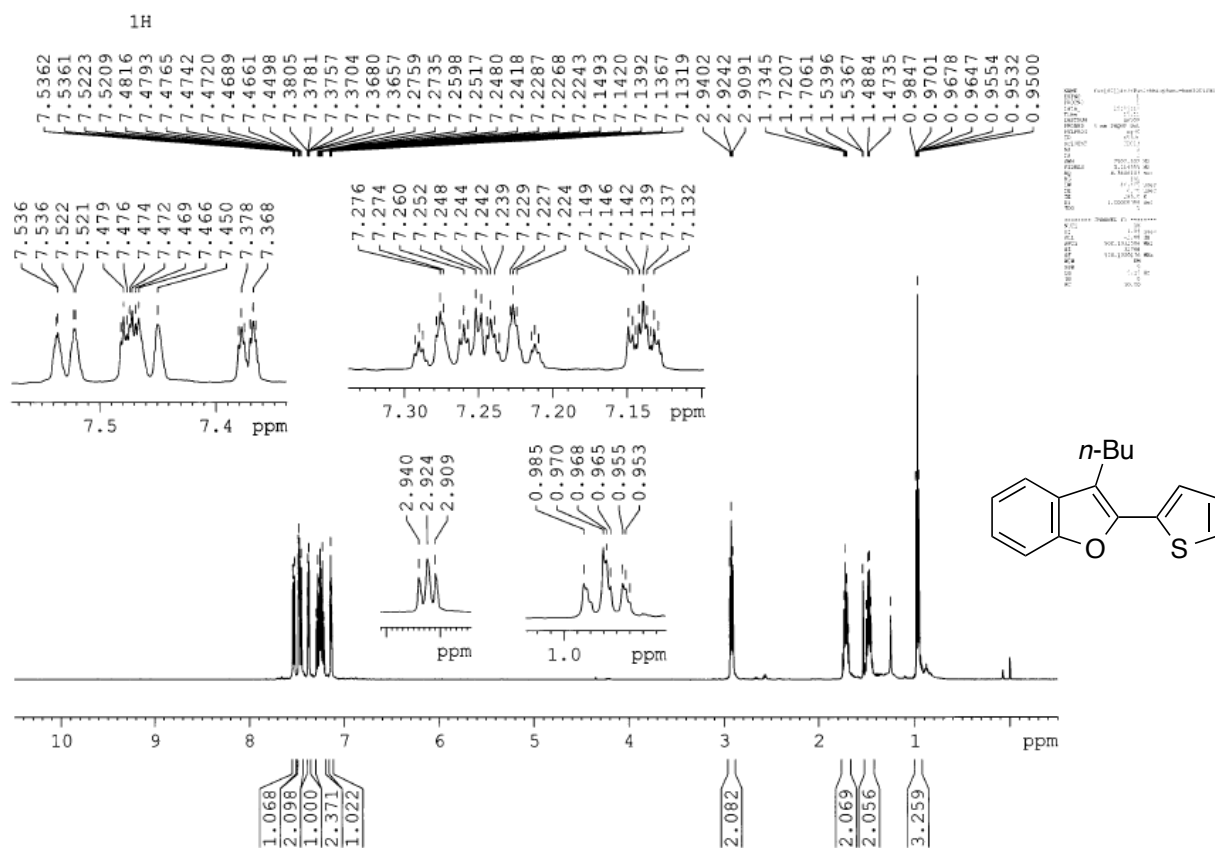

$^{13}\text{C}$  NMR (126 MHz,  $\text{CDCl}_3$ )

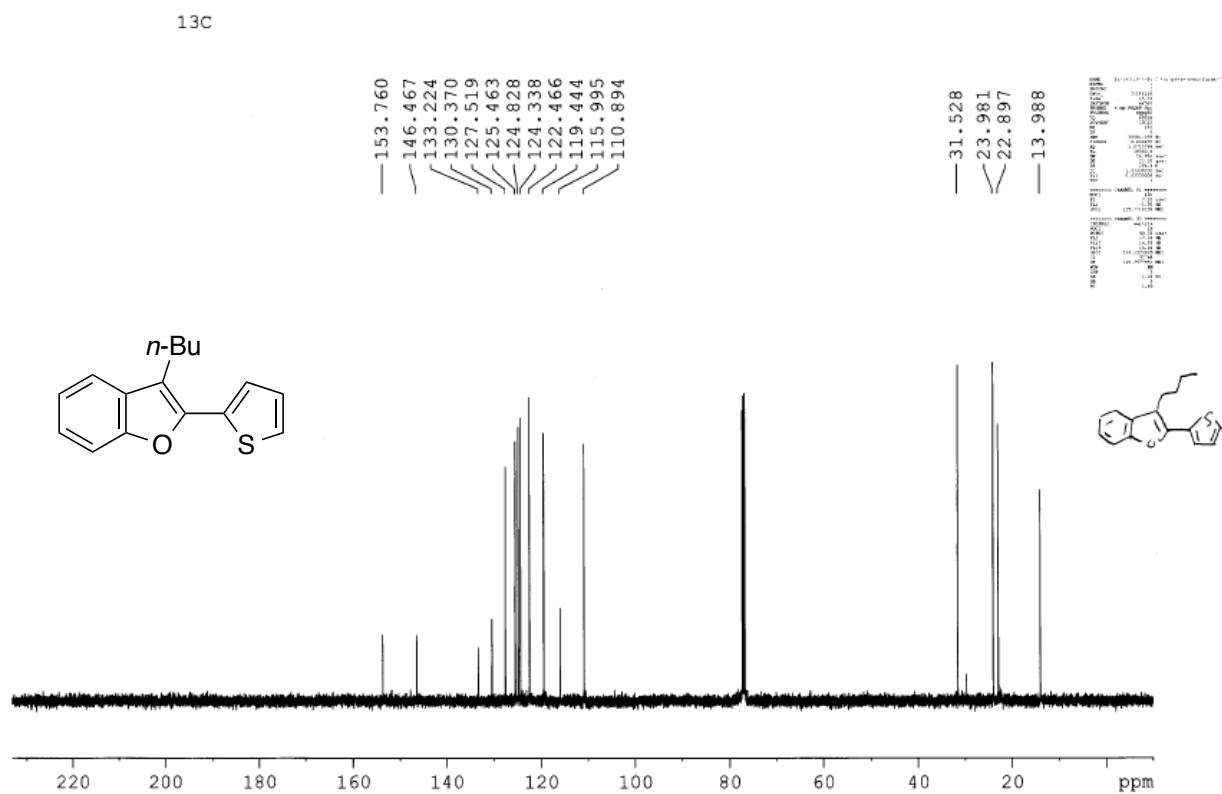

### 3-Butyl-2-(2,4-dimethoxyphenyl)benzofuran (3bf)

$^1\text{H}$  NMR (500 MHz,  $\text{CDCl}_3$ )

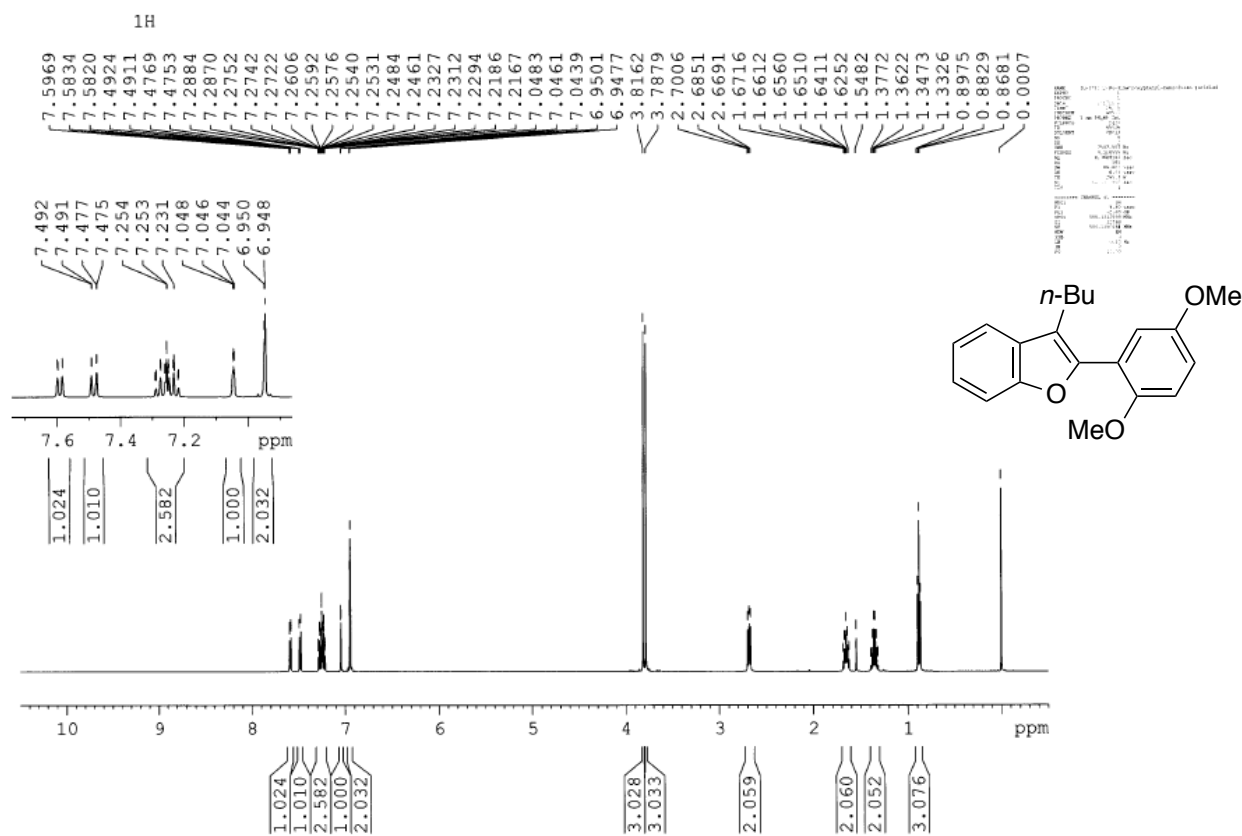

$^{13}\text{C}$  NMR (126 MHz,  $\text{CDCl}_3$ )

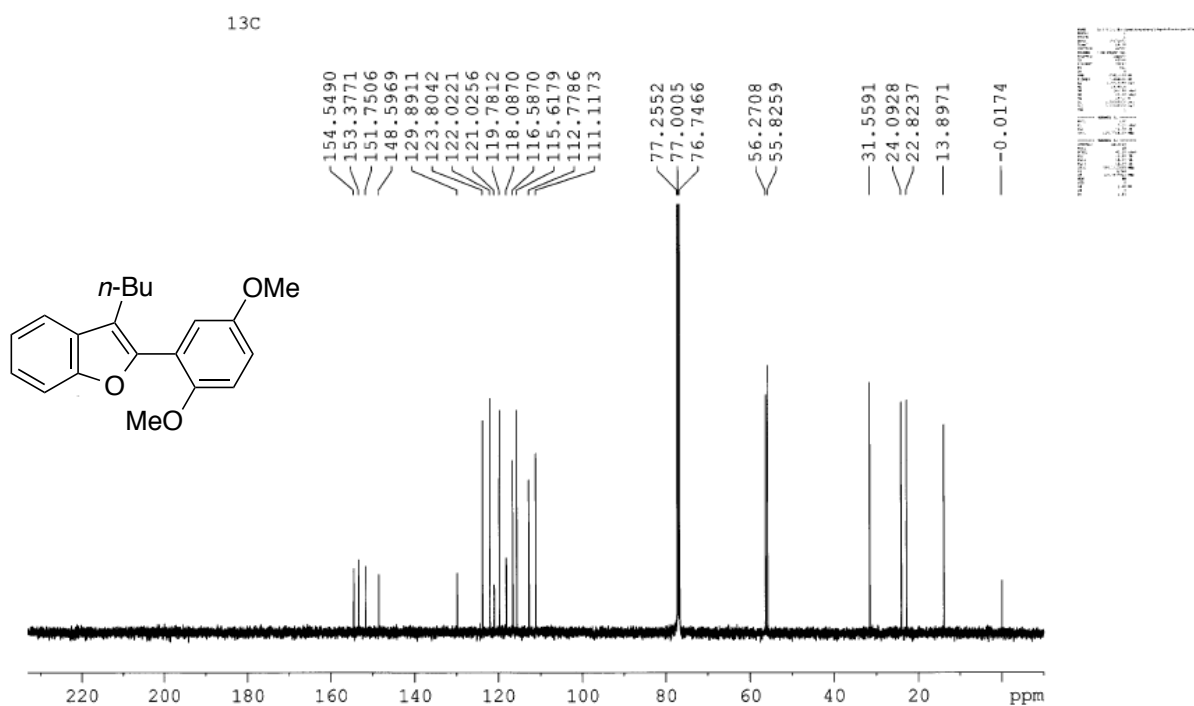

# 2-(2,5-Dimethylphenyl)-3-phenylbenzofuran (3ca)

<sup>1</sup>H NMR (500 MHz, CDCl<sub>3</sub>)

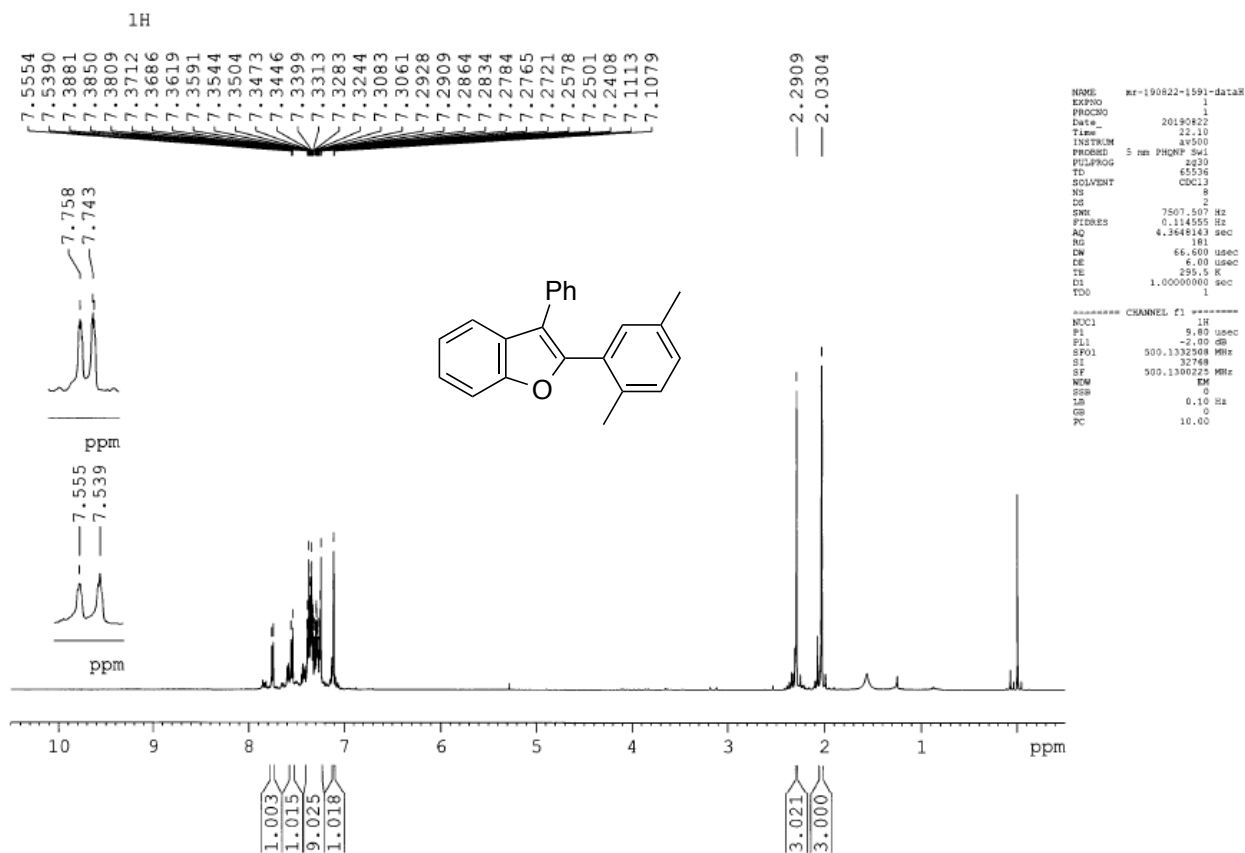

<sup>13</sup>C NMR (126 MHz, CDCl<sub>3</sub>)

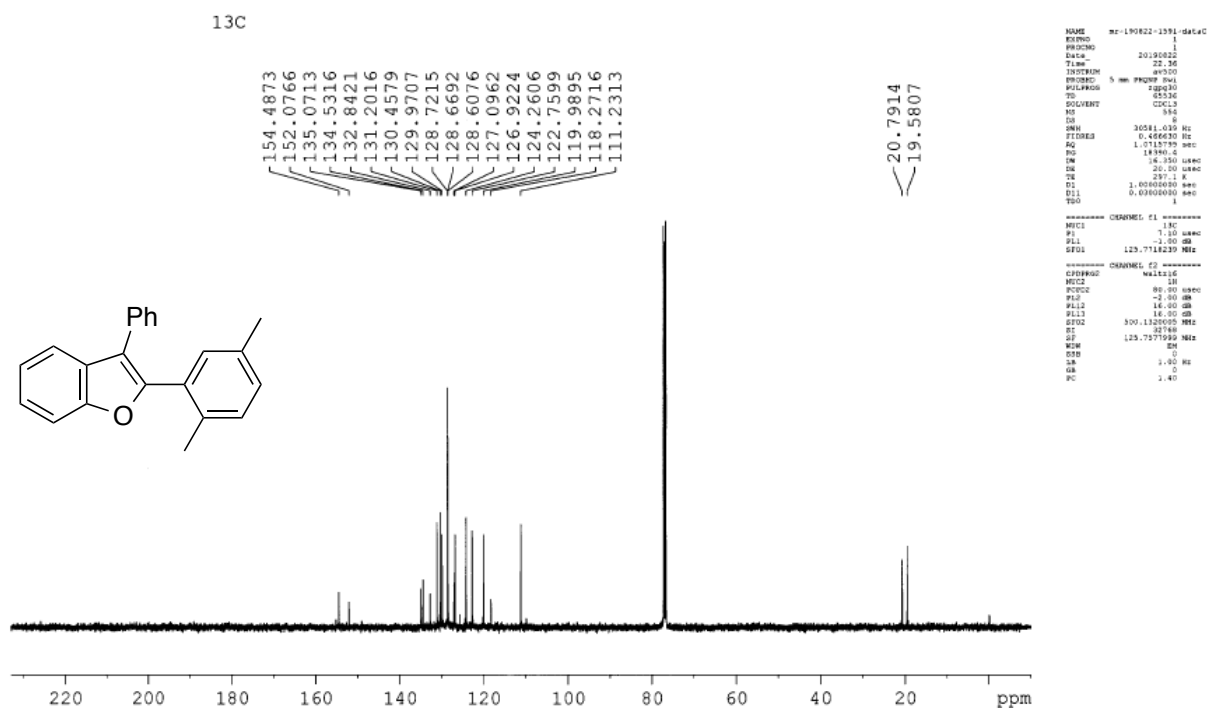

# 2-(2,5-Dimethylphenyl)-3-(4-fluorophenyl)benzofuran (3da)

<sup>1</sup>H NMR (500 MHz, CDCl<sub>3</sub>)

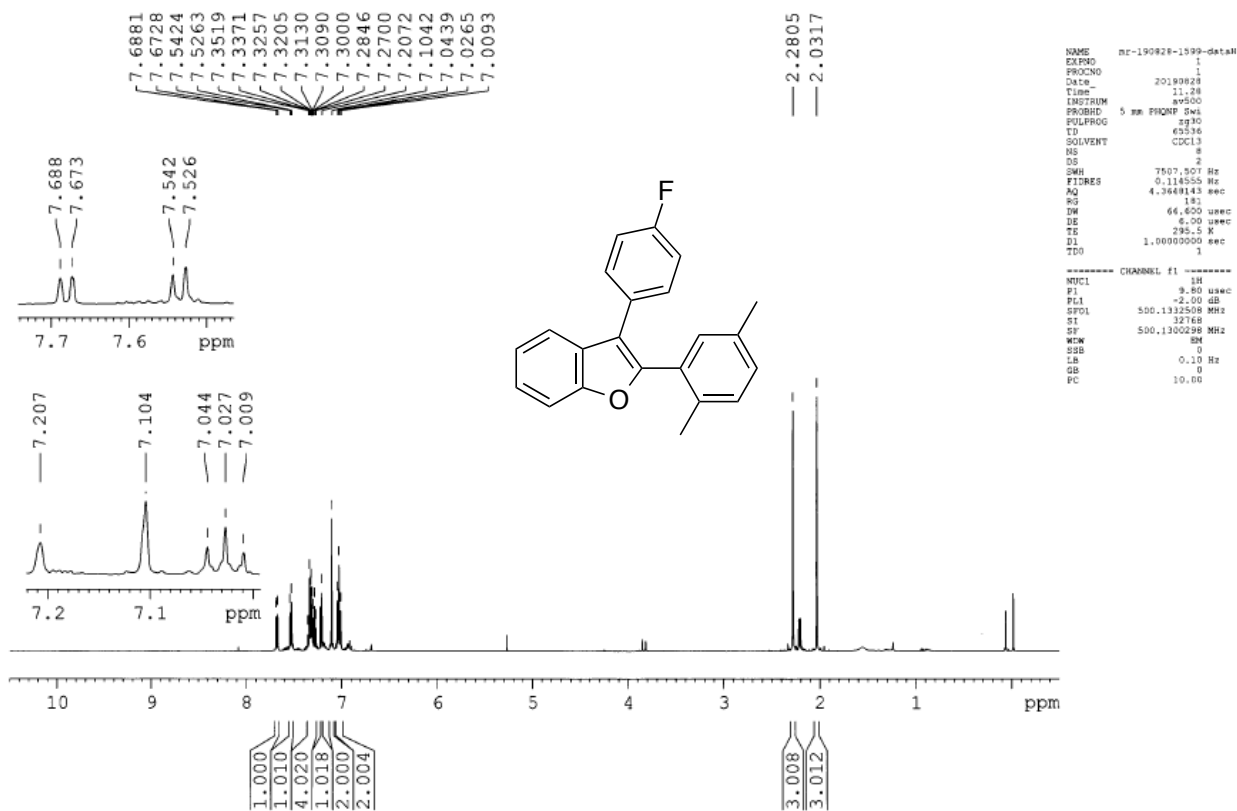

<sup>13</sup>C NMR (126 MHz, CDCl<sub>3</sub>)

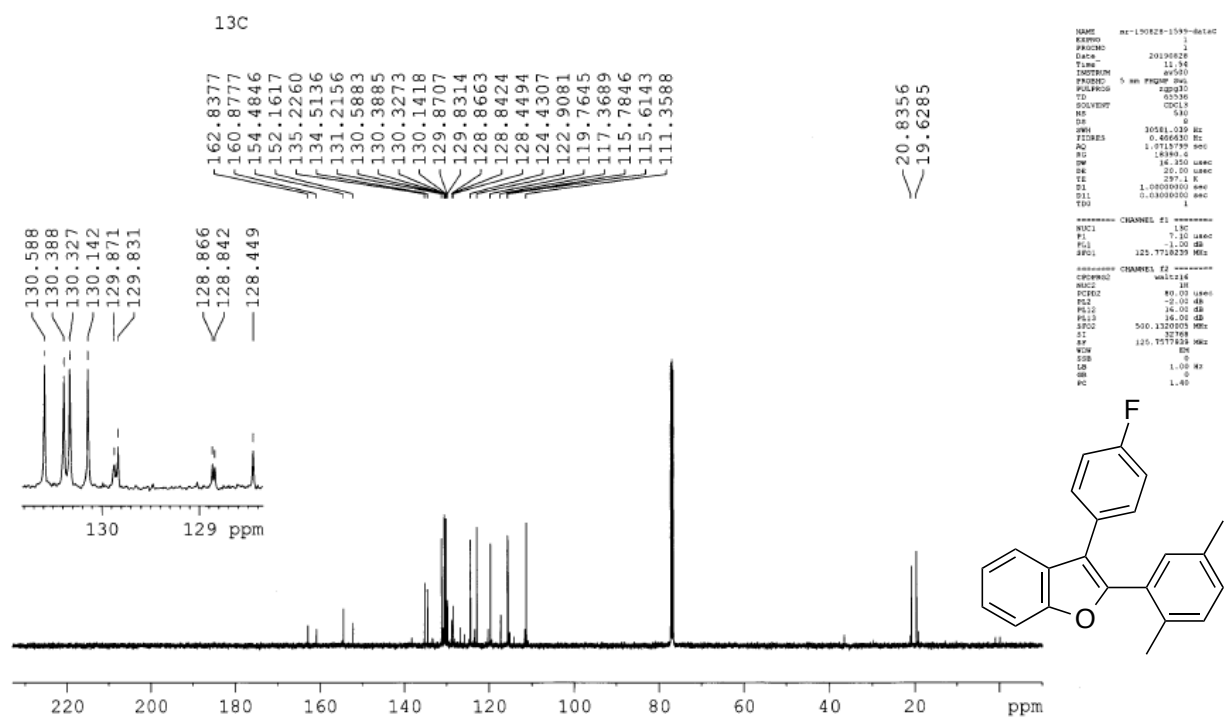



<sup>19</sup>F NMR (470 MHz, CDCl<sub>3</sub>)

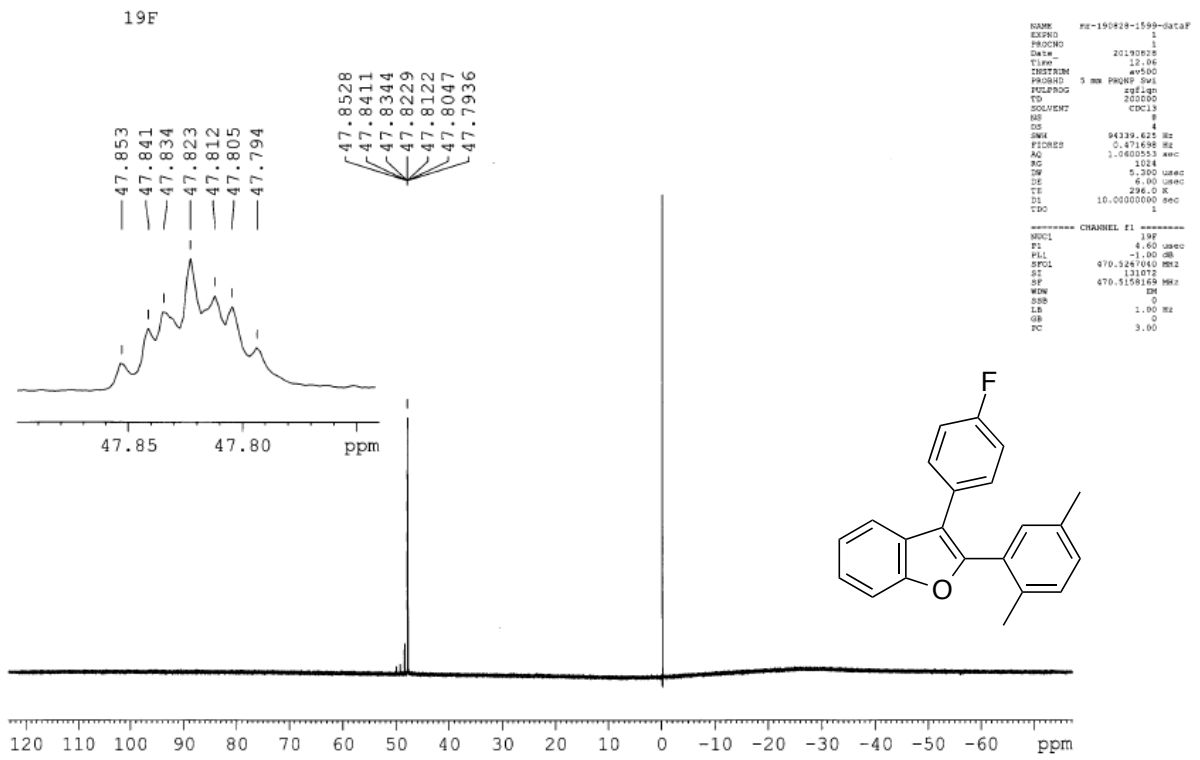

## 2-(2,5-Dimethylphenyl)-5-phenylbenzofuran (3ea)

<sup>1</sup>H NMR (500 MHz, CDCl<sub>3</sub>)

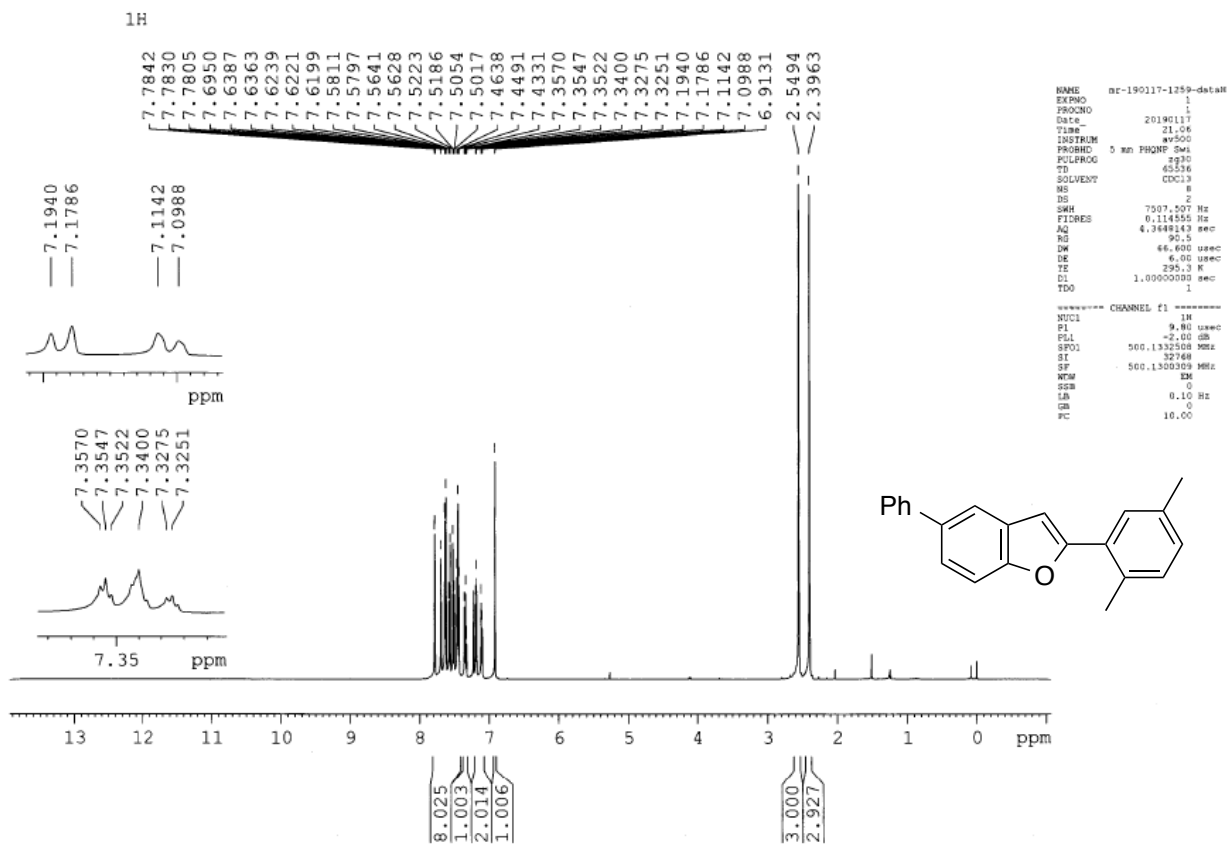

<sup>13</sup>C NMR (126 MHz, CDCl<sub>3</sub>)

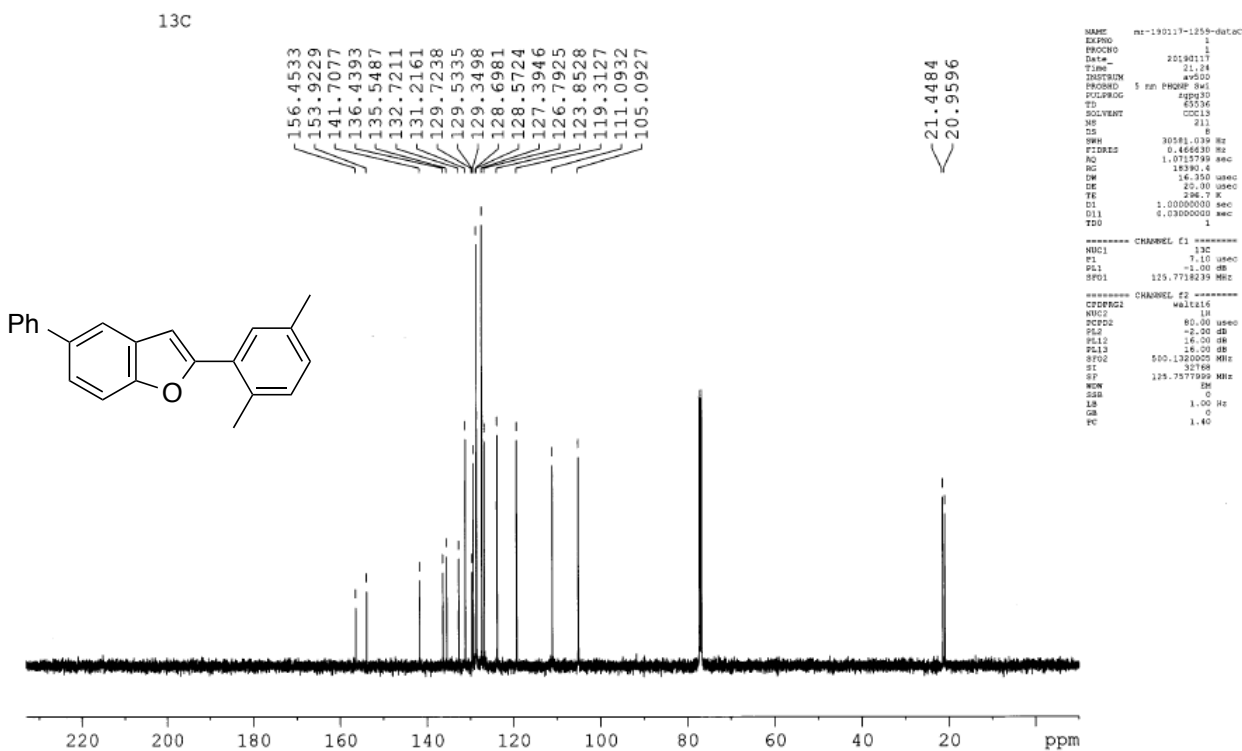

## 2-(2,4-Dimethylphenyl)-5-phenylbenzofuran (3eb)

<sup>1</sup>H NMR (500 MHz, CDCl<sub>3</sub>)

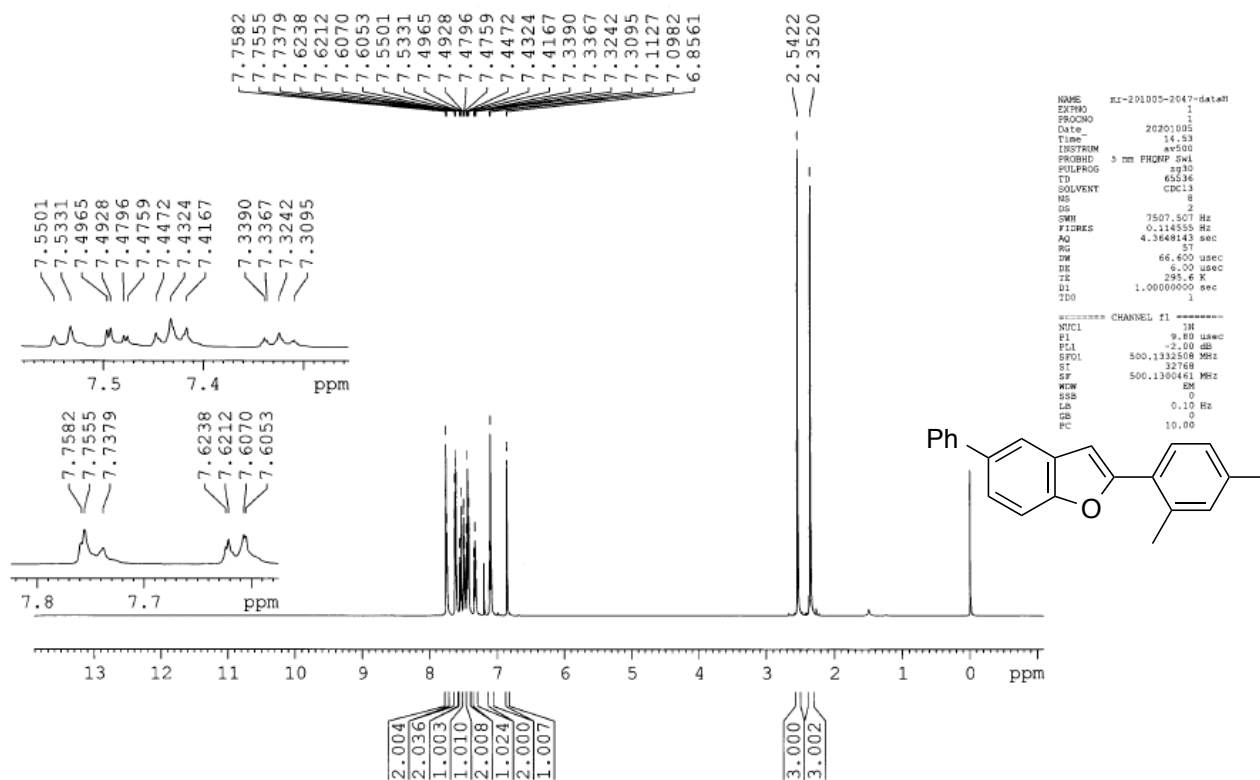

<sup>13</sup>C NMR (126 MHz, CDCl<sub>3</sub>)

13C

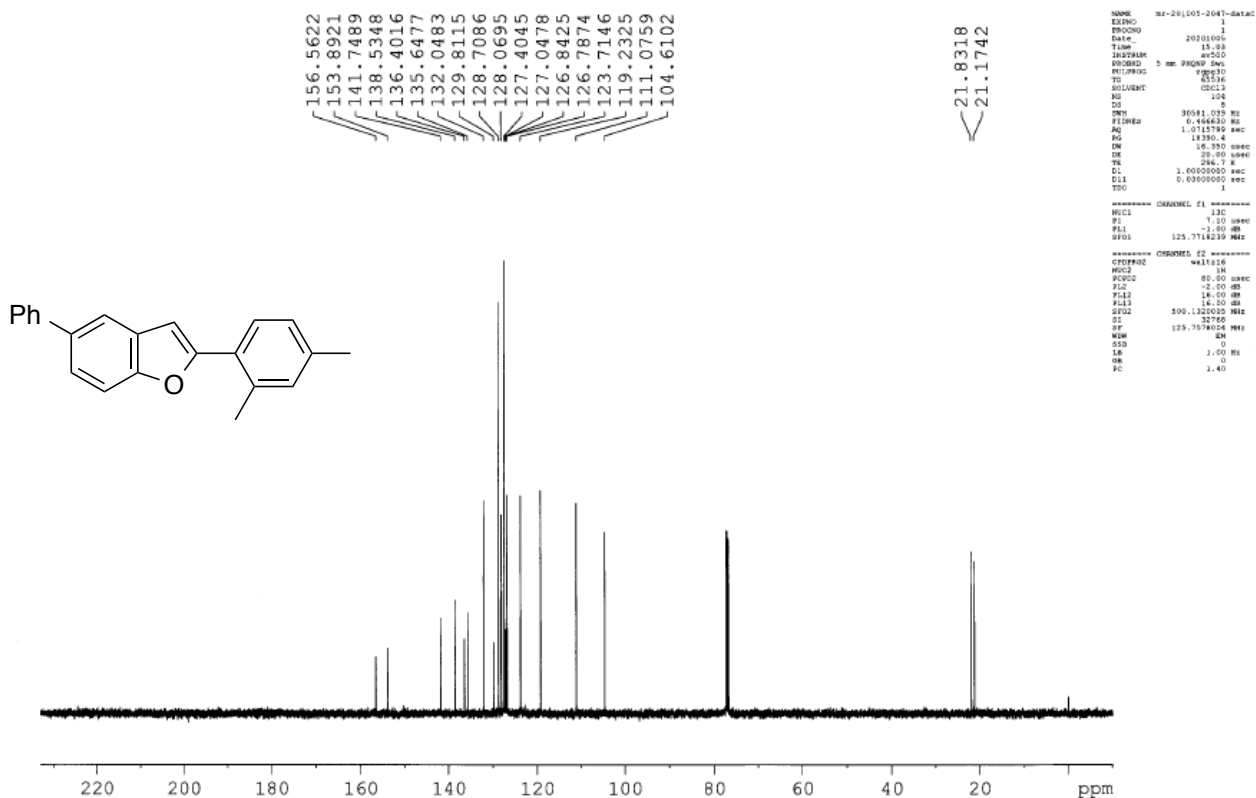

# 5-Phenyl-2-(thiophen-2-yl)benzofuran (3c)

<sup>1</sup>H NMR (500 MHz, CDCl<sub>3</sub>)

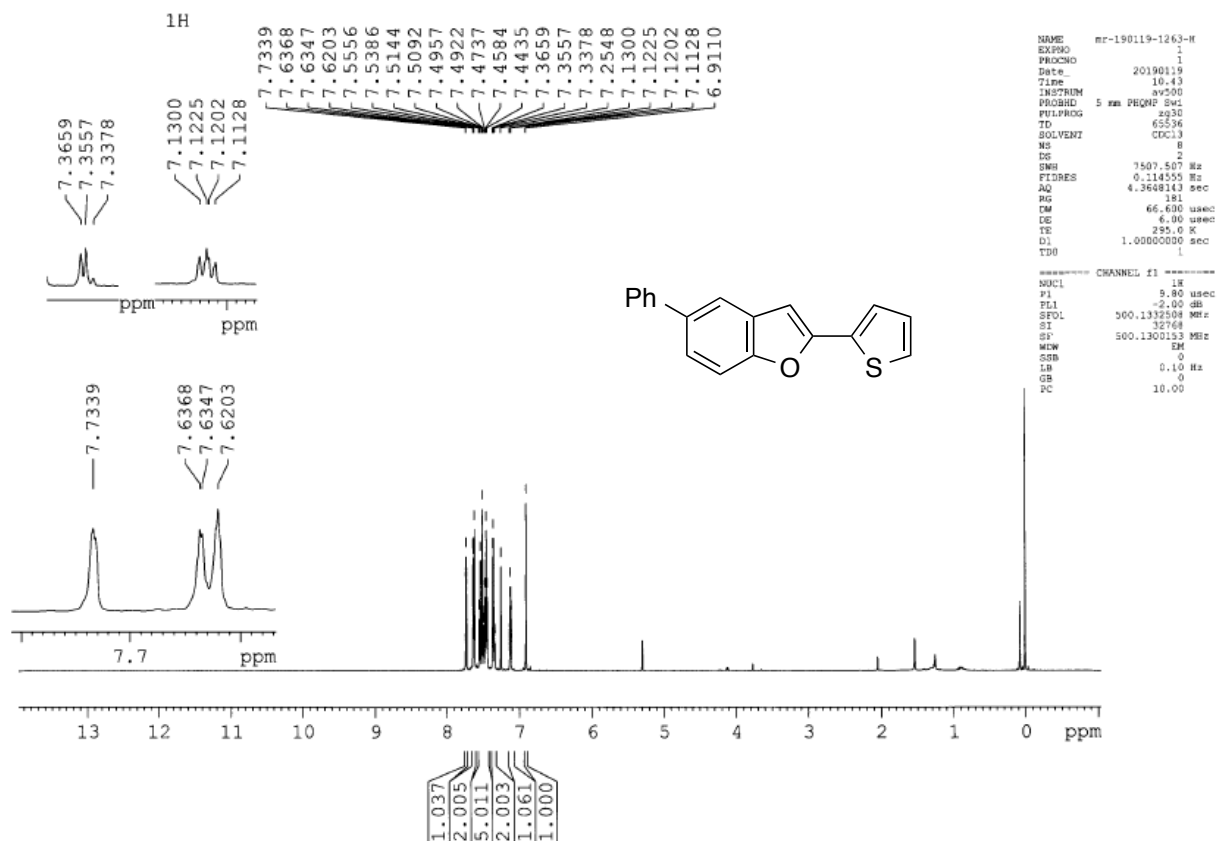

<sup>13</sup>C NMR (126 MHz, CDCl<sub>3</sub>)

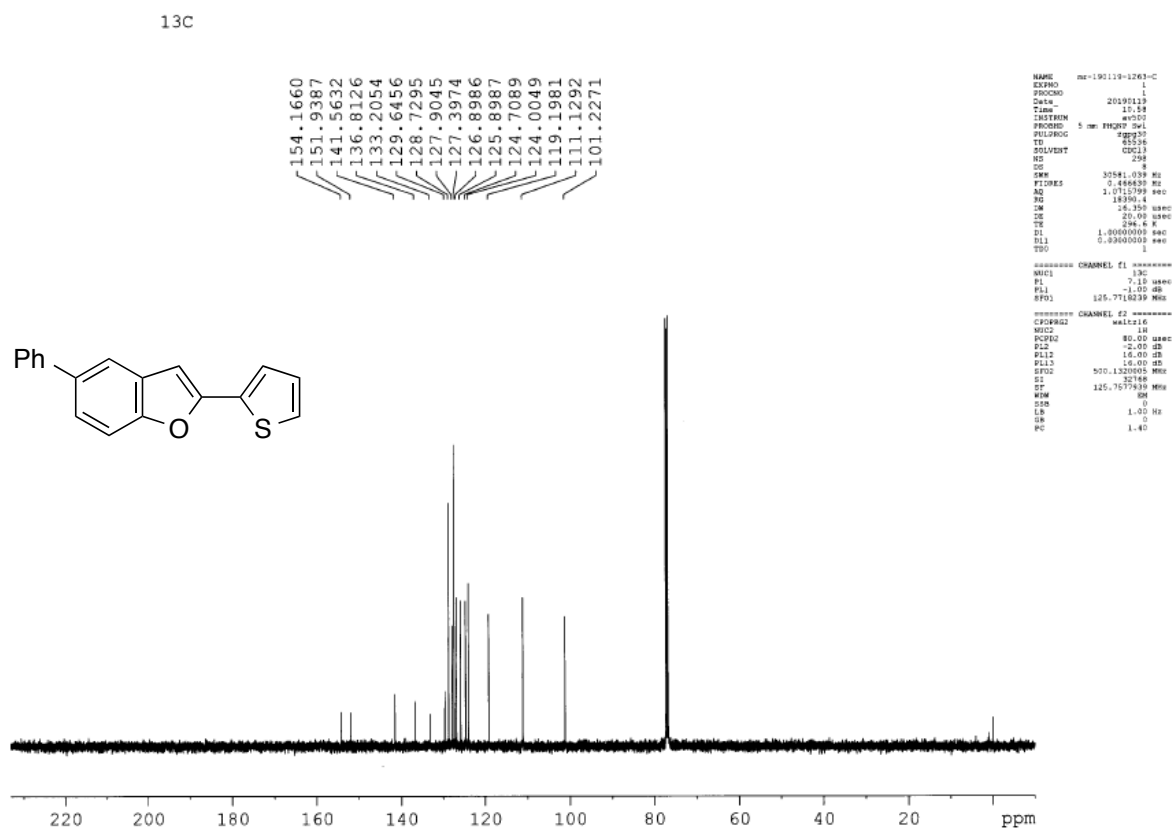

## 2-(2,5-Dimethylphenyl)-5-(4-fluorophenyl)benzofuran (3fa)

<sup>1</sup>H NMR (500 MHz, CDCl<sub>3</sub>)

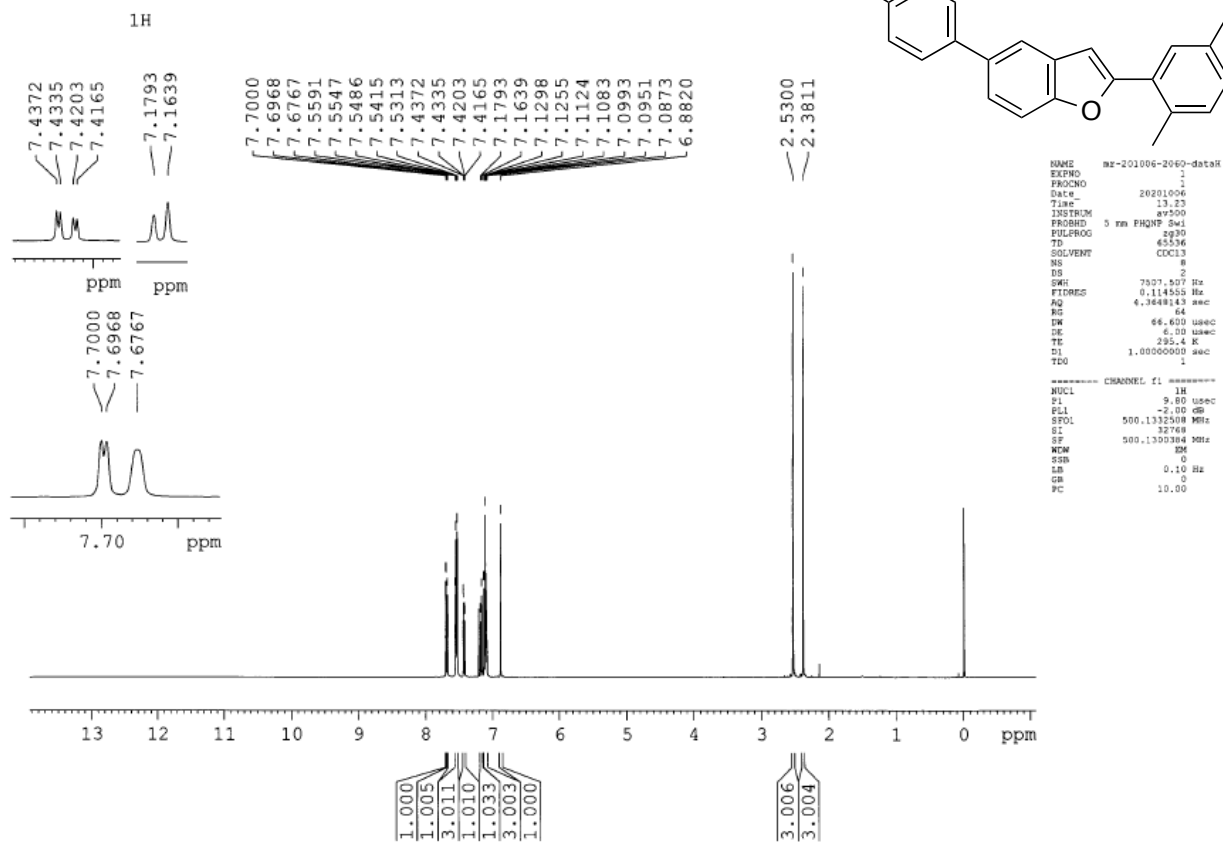

<sup>13</sup>C NMR (126 MHz, CDCl<sub>3</sub>)

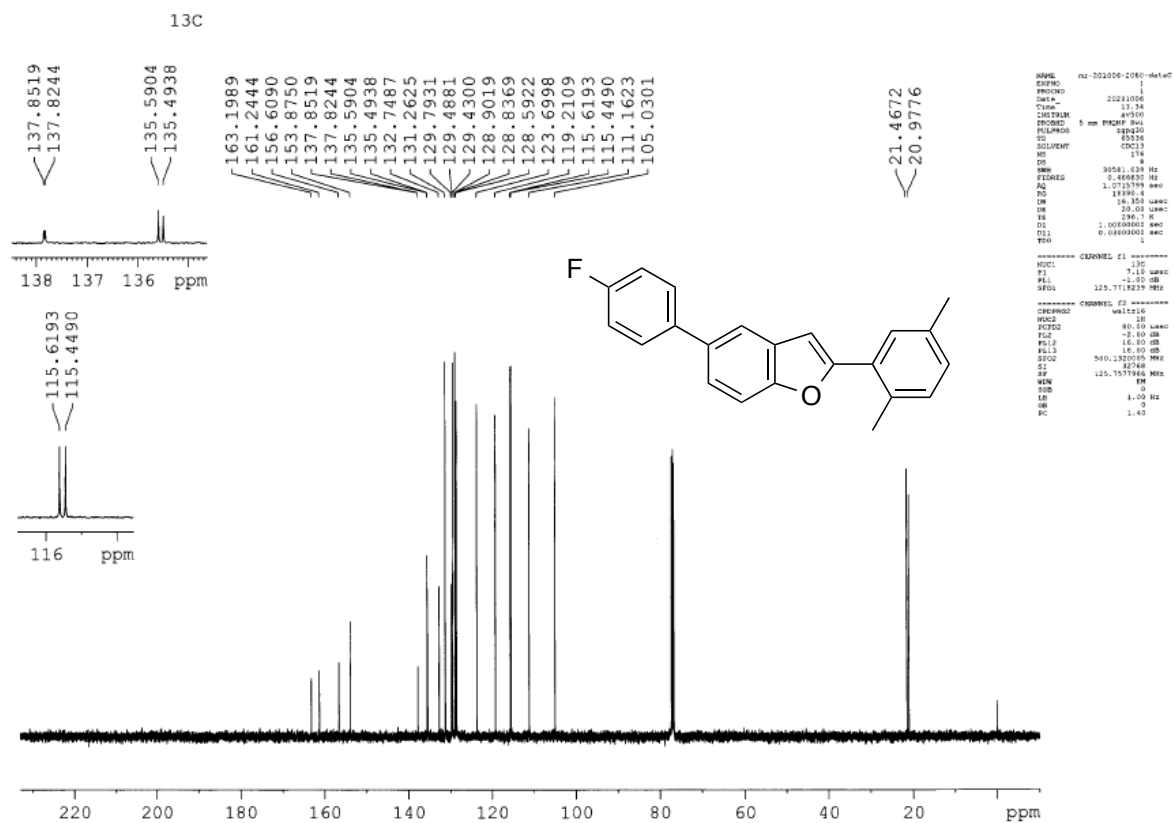

<sup>19</sup>F NMR (470 MHz, CDCl<sub>3</sub>)

19F

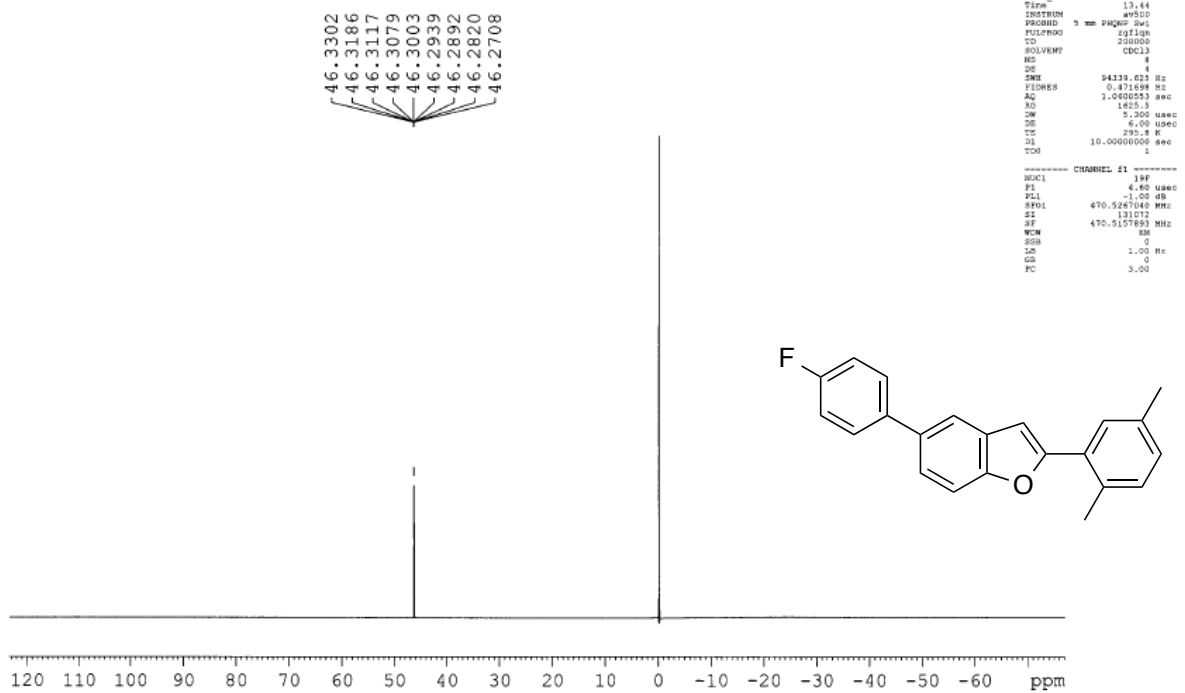

## 2-(2,4-Dimethylphenyl)-5-(4-fluorophenyl)benzofuran (3fb)

<sup>1</sup>H NMR (500 MHz, CDCl<sub>3</sub>)

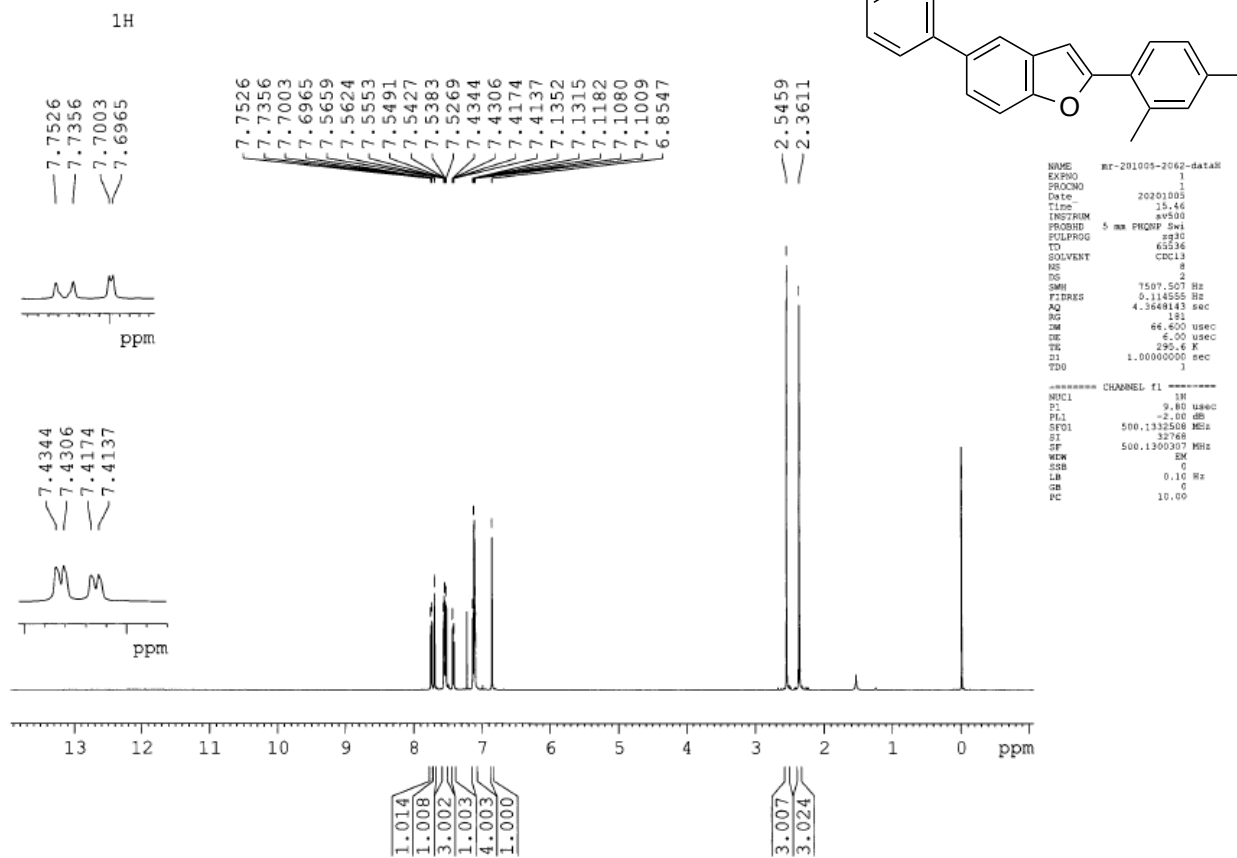

<sup>13</sup>C NMR (126 MHz, CDCl<sub>3</sub>)

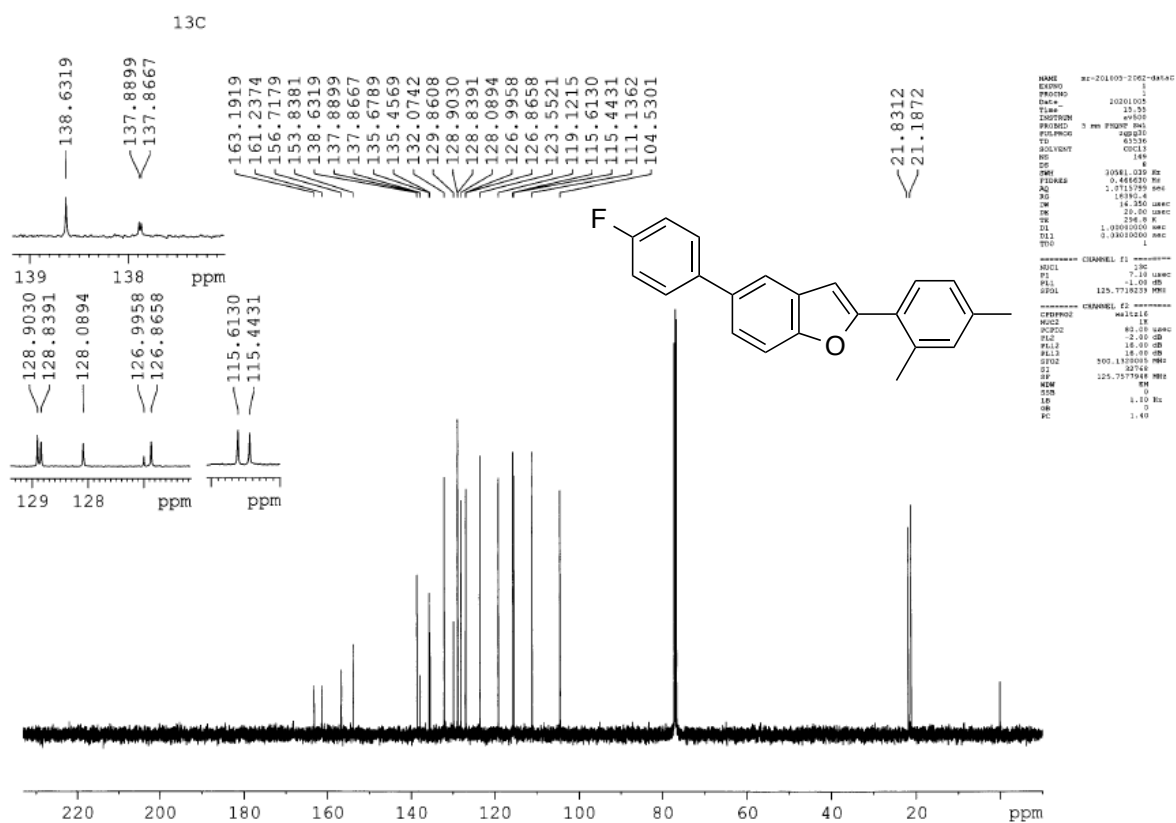

<sup>19</sup>F NMR (470 MHz, CDCl<sub>3</sub>)

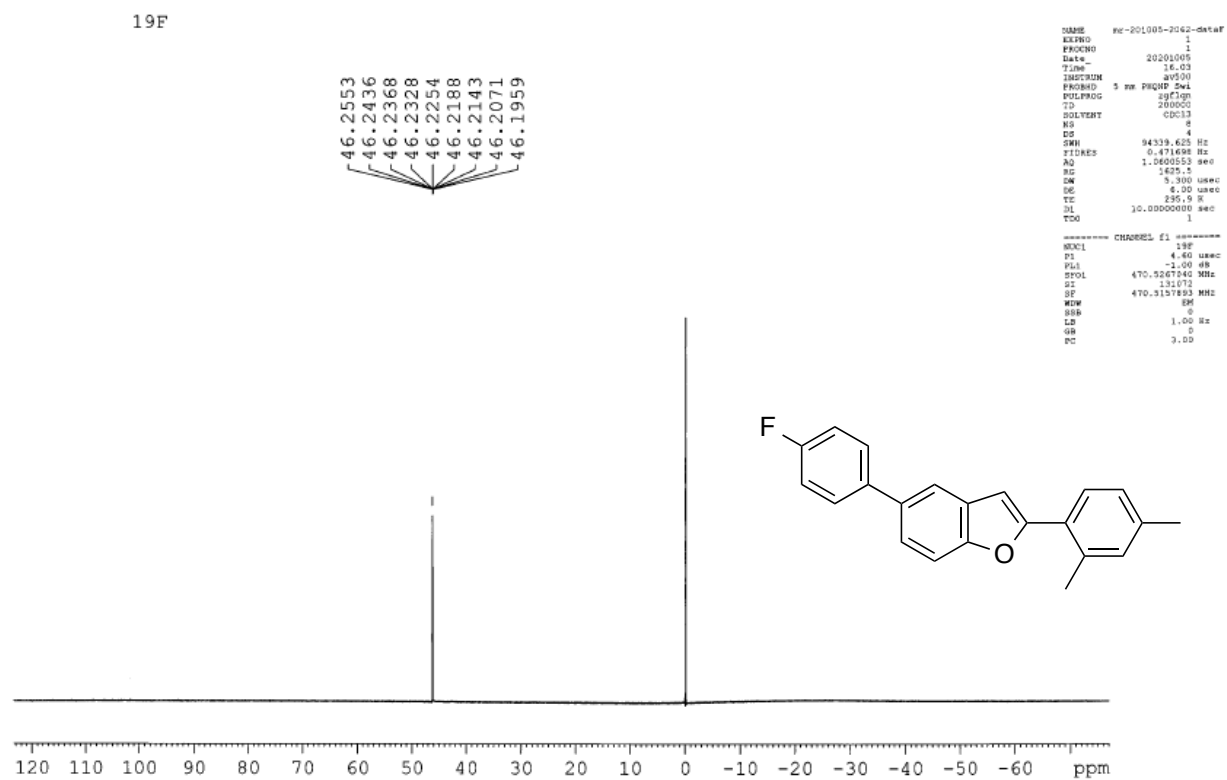



# Ethyl 4-[2-(2,5-Dimethylphenyl)benzofuran-5-yl]benzoate (3ga)

<sup>1</sup>H NMR (500 MHz, CDCl<sub>3</sub>)

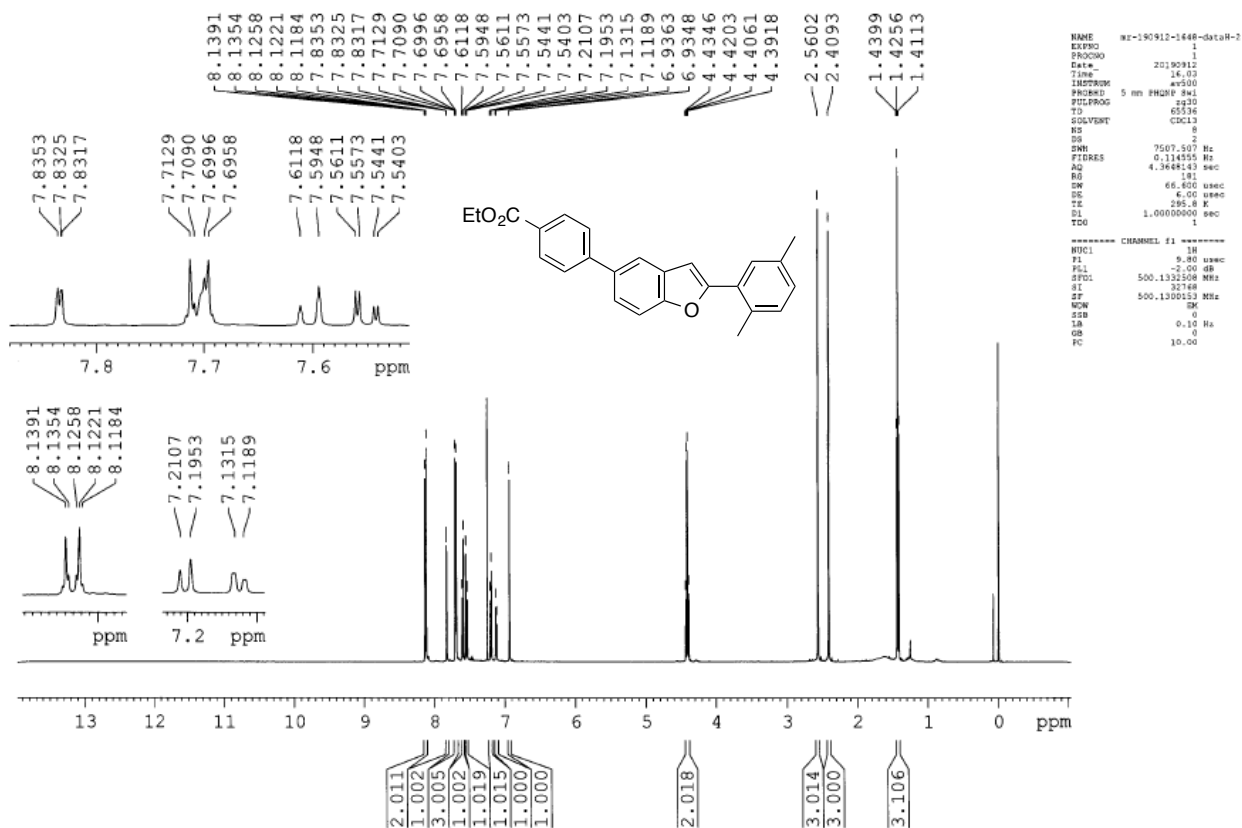

<sup>13</sup>C NMR (126 MHz, CDCl<sub>3</sub>)

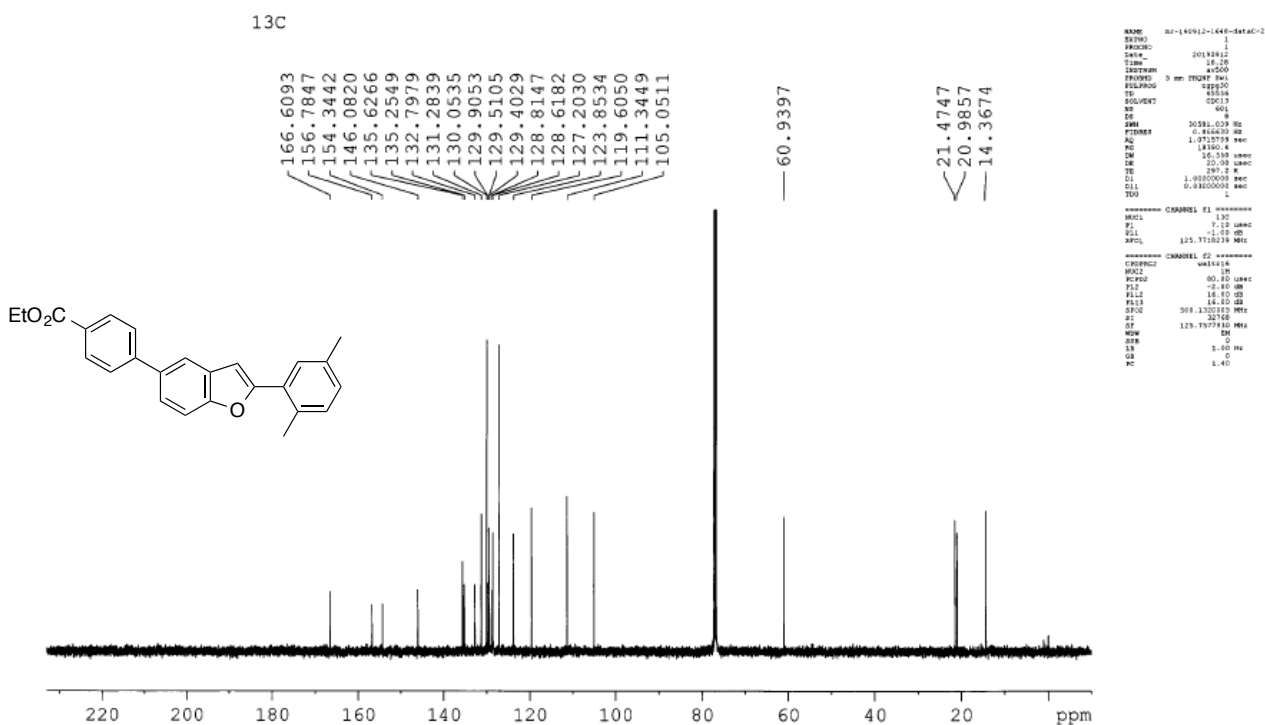

# 5-Bromo-2-(2,5-dimethylphenyl)benzofuran (3ha)

<sup>1</sup>H NMR (500 MHz, CDCl<sub>3</sub>)

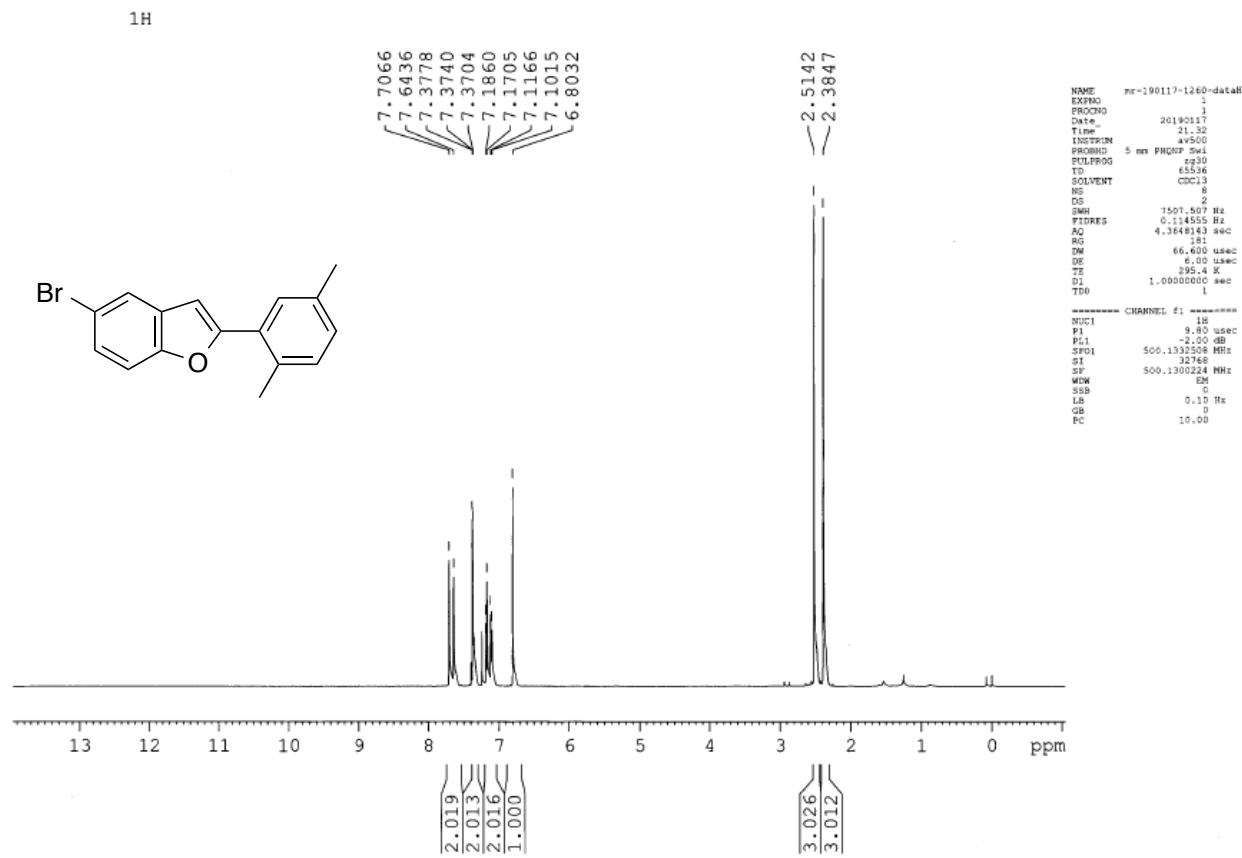

<sup>13</sup>C NMR (126 MHz, CDCl<sub>3</sub>)

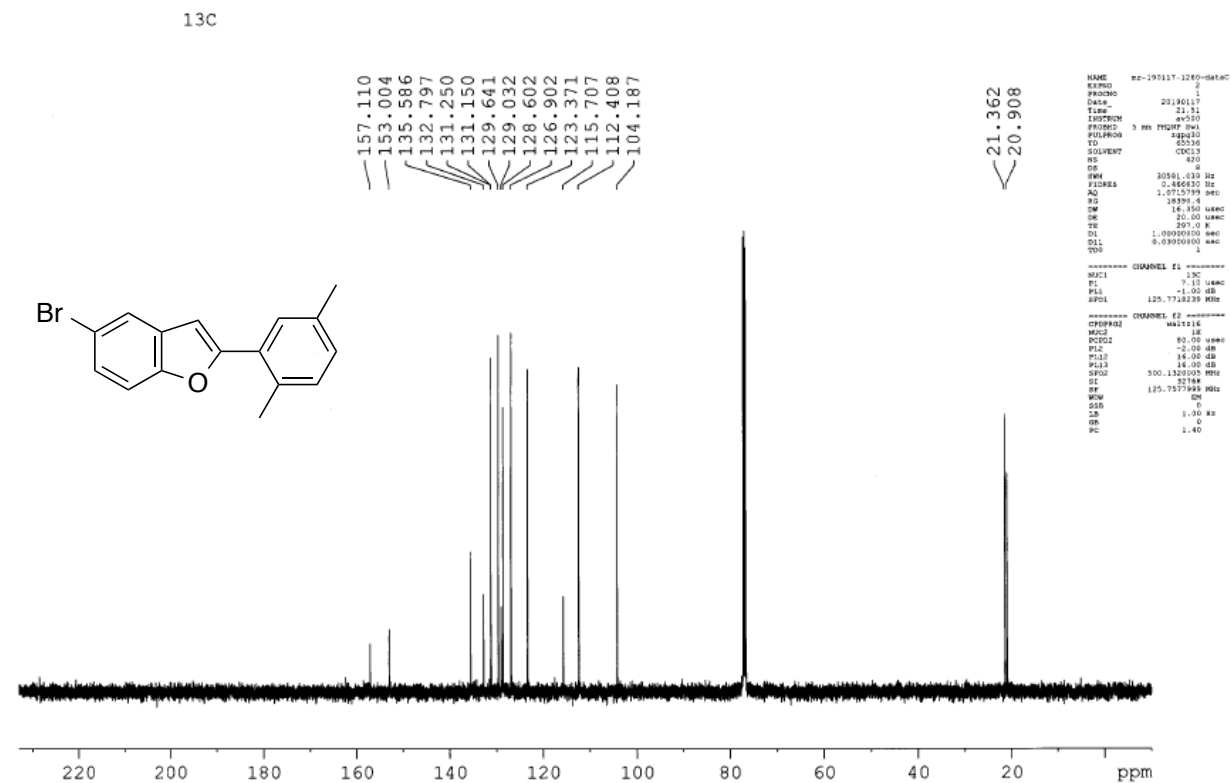

# 5-Bromo-2-(2,4-dimethylphenyl)benzofuran (3hb)

<sup>1</sup>H NMR (500 MHz, CDCl<sub>3</sub>)

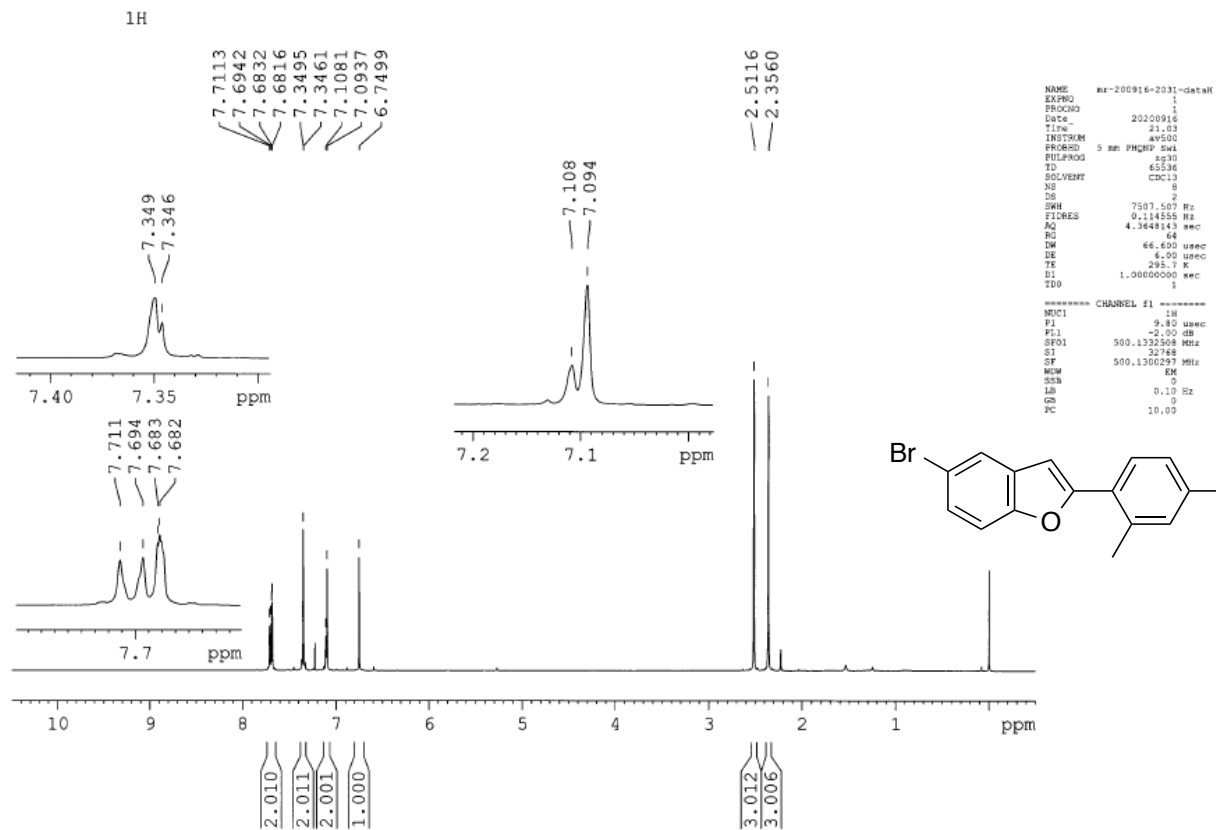

<sup>13</sup>C NMR (126 MHz, CDCl<sub>3</sub>)

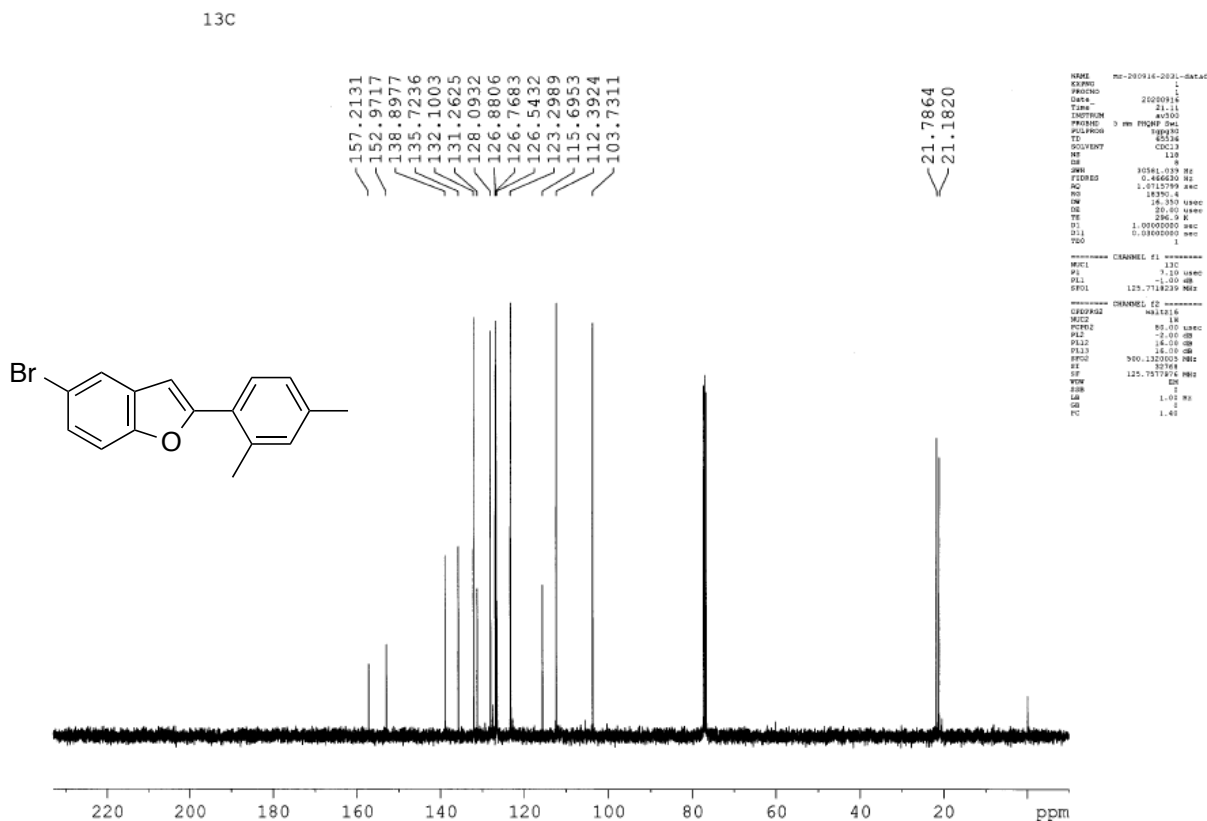

# 5-Bromo-2-(thiophen-2-yl)benzofuran (3hc)

<sup>1</sup>H NMR (500 MHz, CDCl<sub>3</sub>)

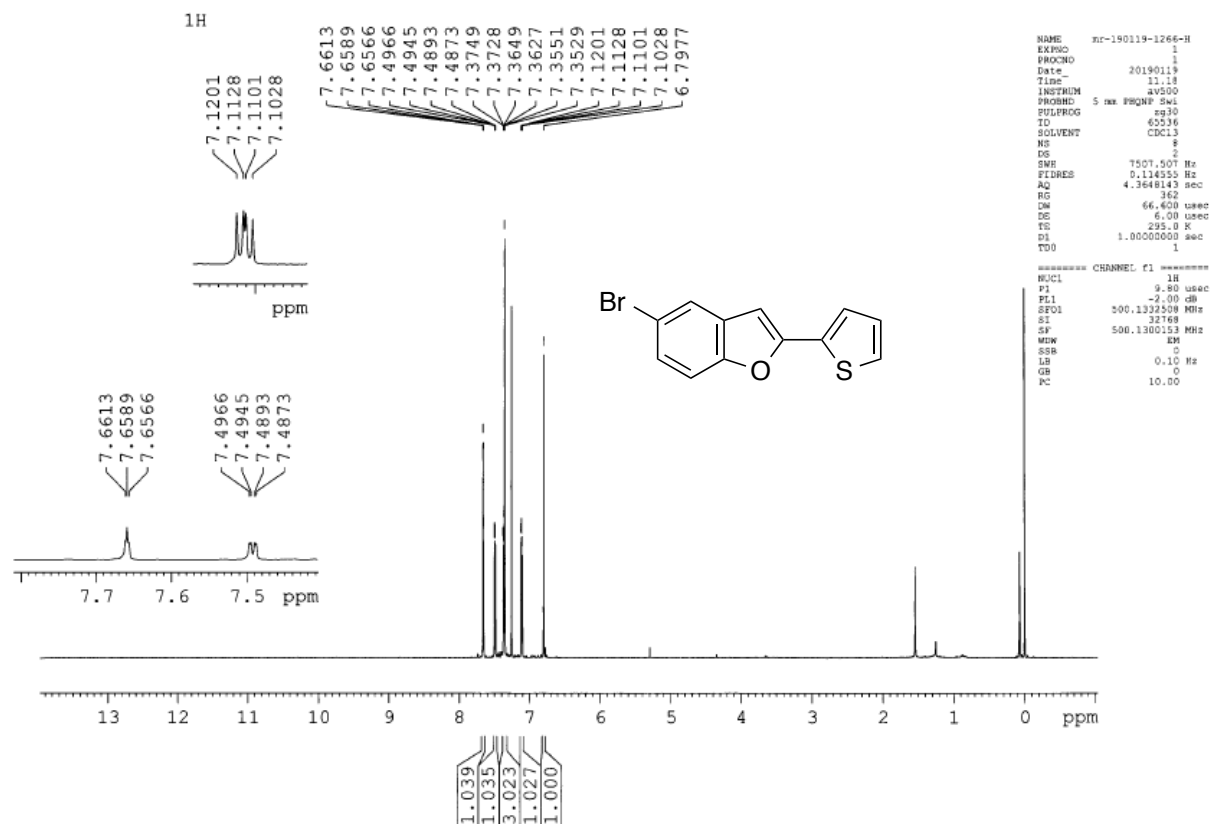

<sup>13</sup>C NMR (126 MHz, CDCl<sub>3</sub>)

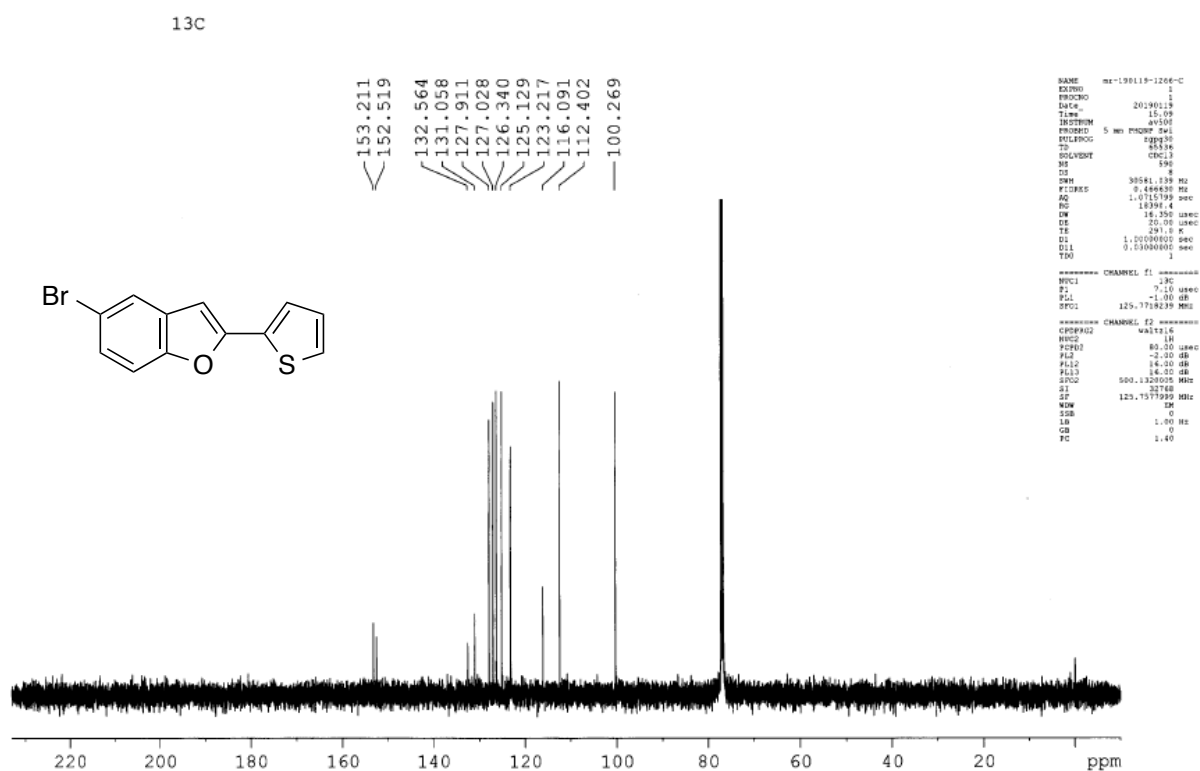

# 2-(2,5-Dimethylphenyl)-5-methoxybenzofuran (3ia)

<sup>1</sup>H NMR (500 MHz, CDCl<sub>3</sub>)

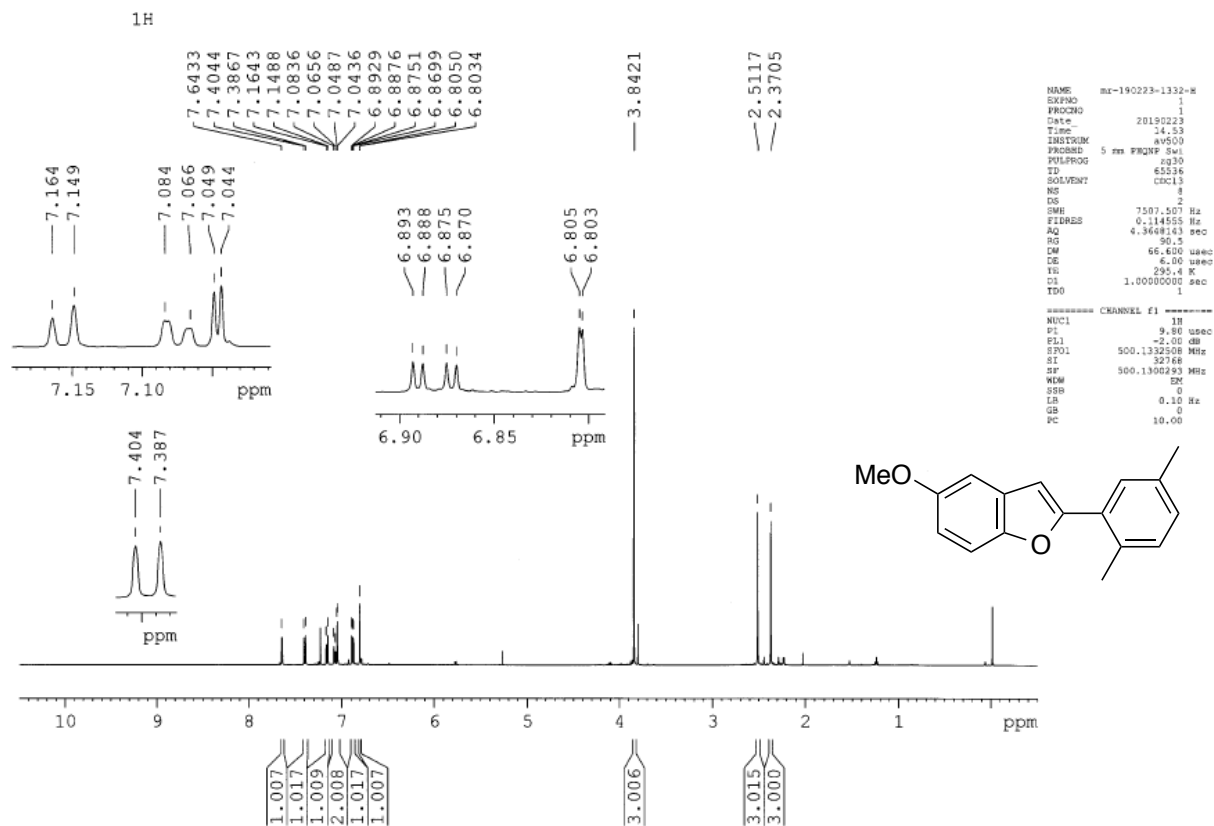

<sup>13</sup>C NMR (126 MHz, CDCl<sub>3</sub>)

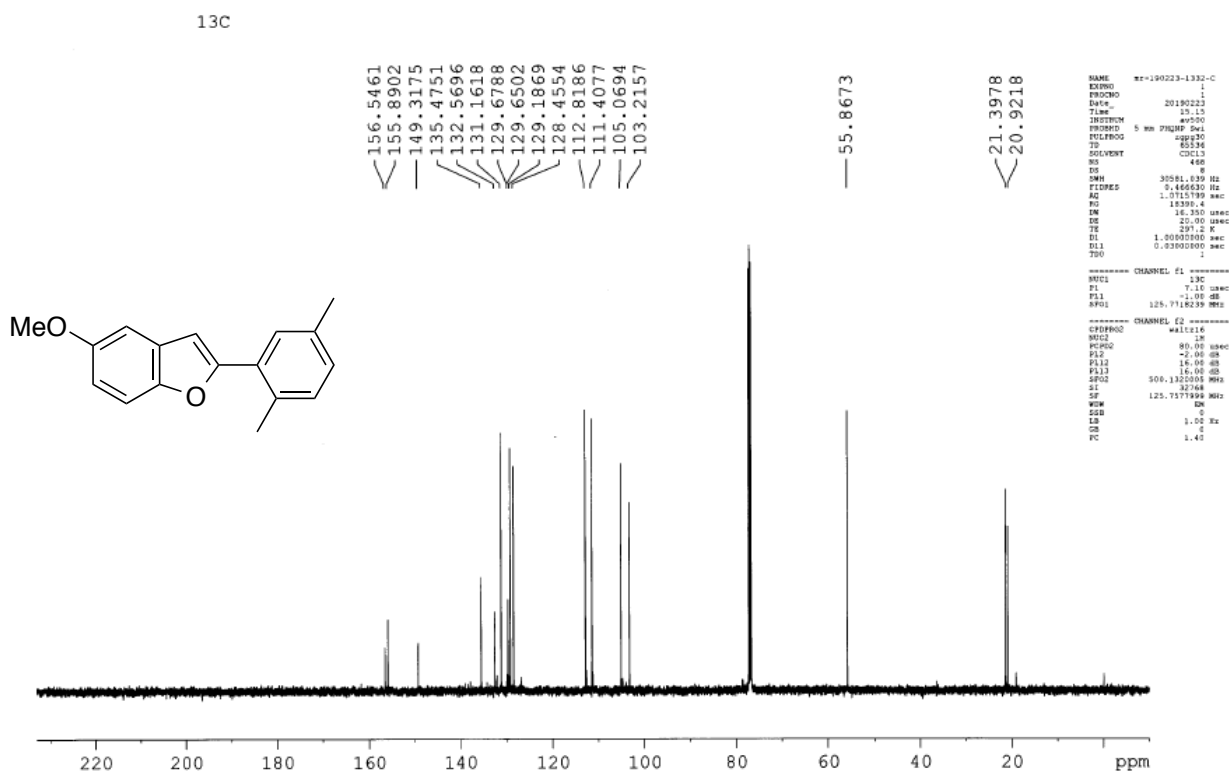

## 2-(2,5-Dimethylphenyl)-6-methoxybenzofuran (3ja)

<sup>1</sup>H NMR (500 MHz, CDCl<sub>3</sub>)

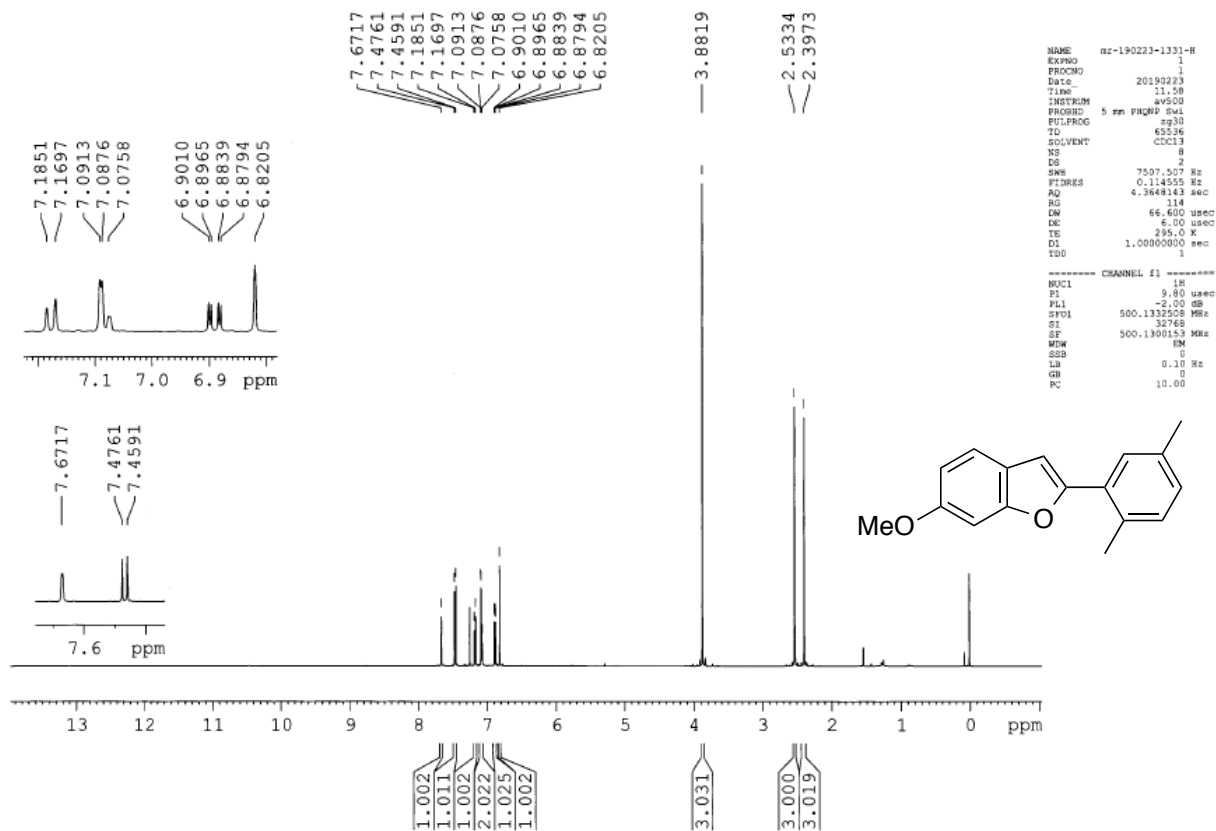

<sup>13</sup>C NMR (126 MHz, CDCl<sub>3</sub>)

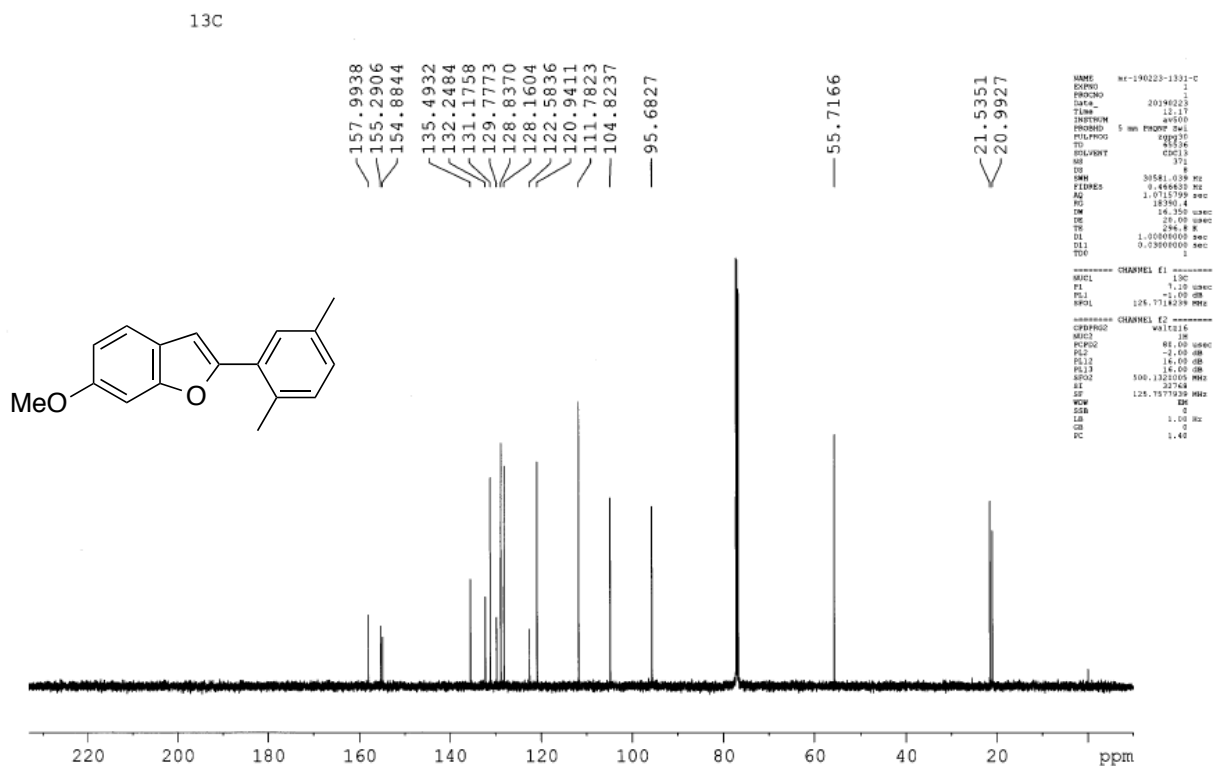

# 2-(2,5-Dimethylphenyl)-7-methoxybenzofuran (3ka)

<sup>1</sup>H NMR (500 MHz, CDCl<sub>3</sub>)

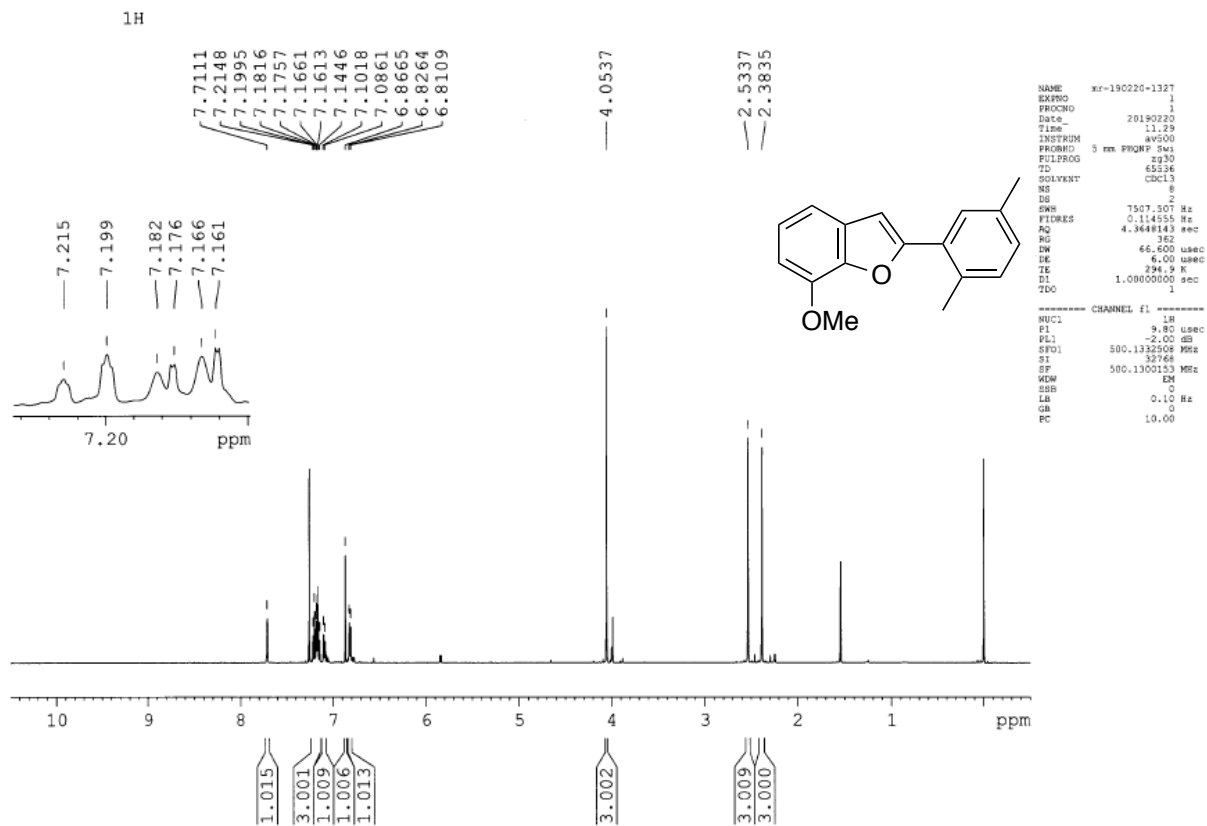

<sup>13</sup>C NMR (126 MHz, CDCl<sub>3</sub>)

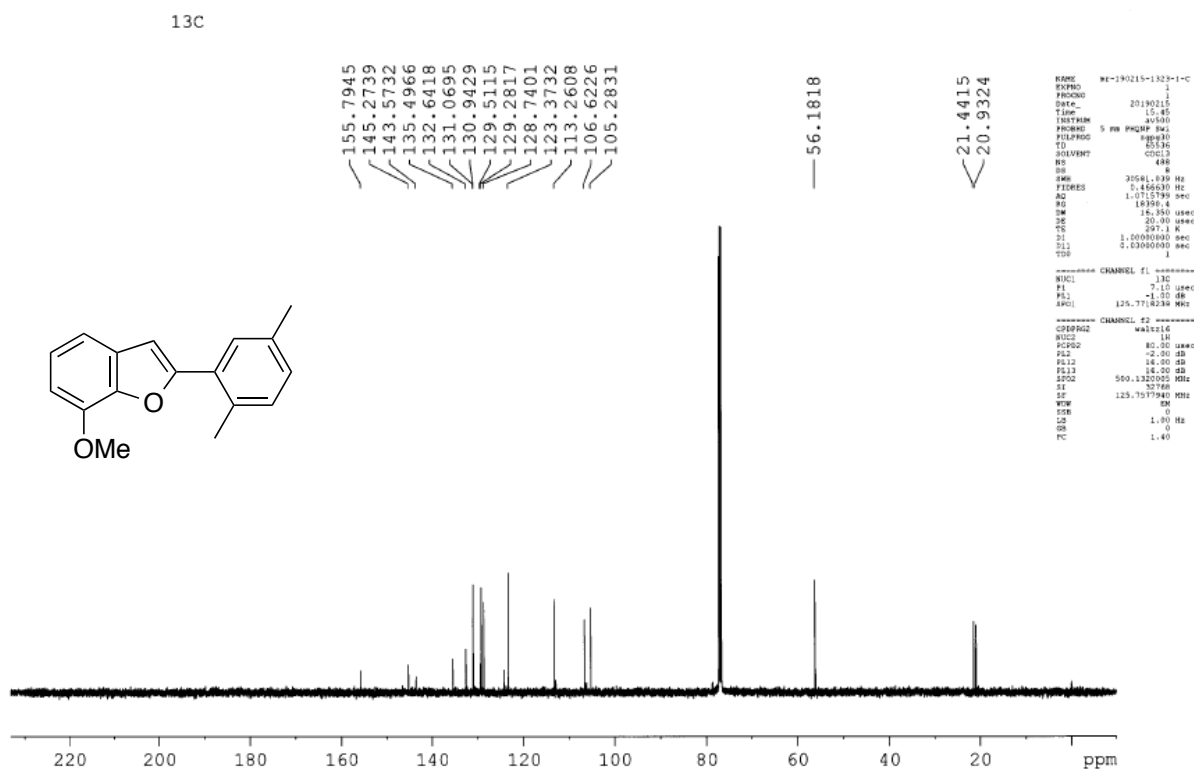

# 2-(2,5-Dimethylphenyl)naphtho[2,1-b]furan (3la)

<sup>1</sup>H NMR (500 MHz, CDCl<sub>3</sub>)

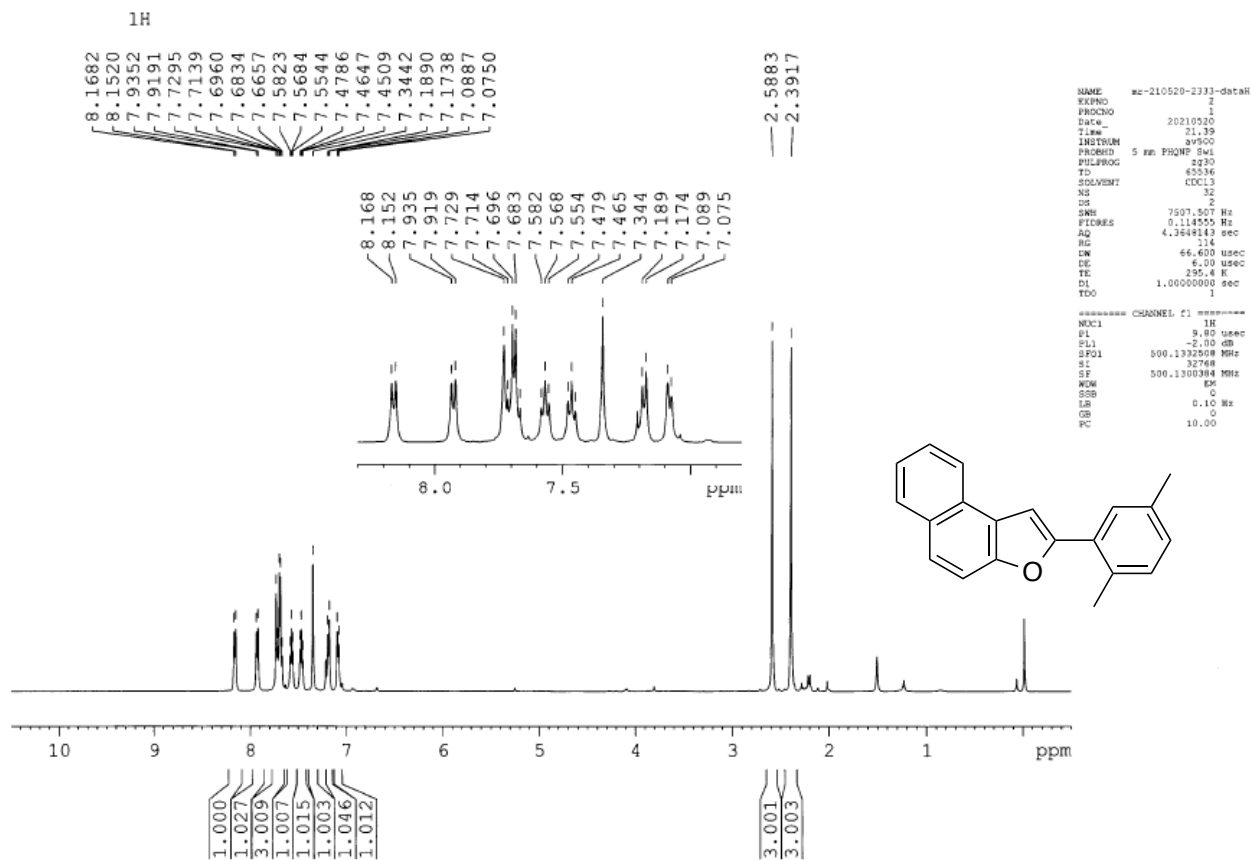

<sup>13</sup>C NMR (126 MHz, CDCl<sub>3</sub>)

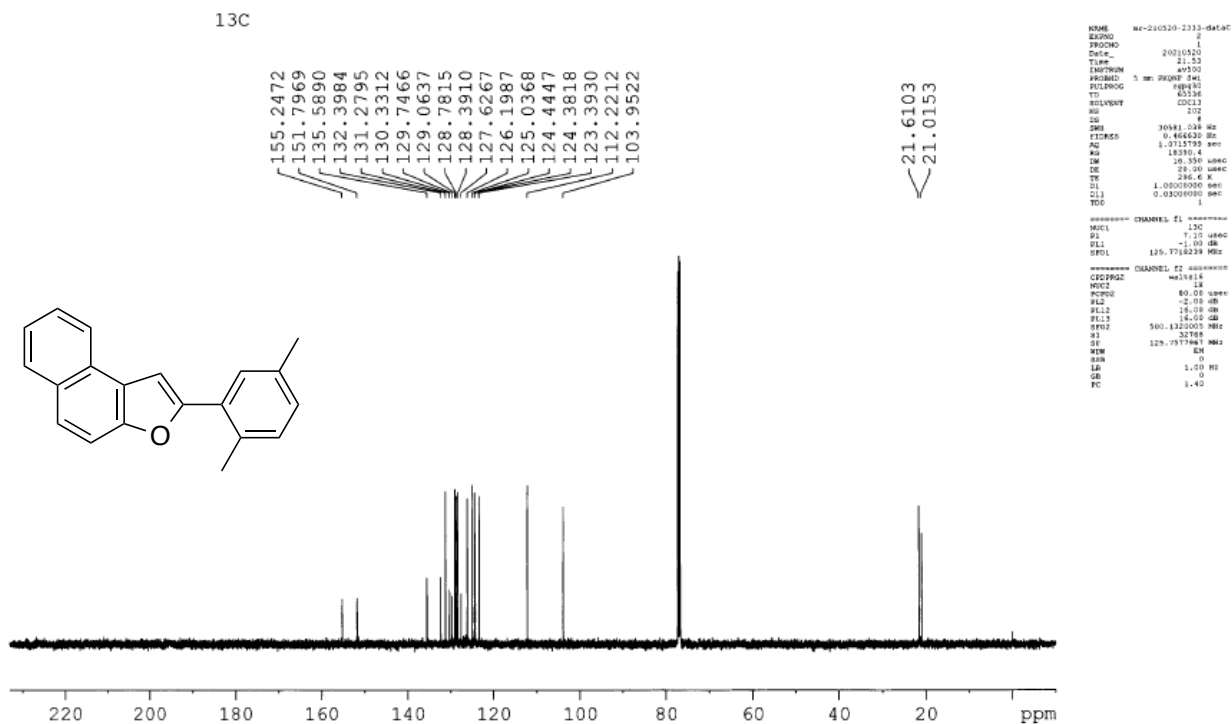



# 2-(2,4-Dimethylphenyl)benzo[b]thiophene (3mb)

<sup>1</sup>H NMR (500 MHz, CDCl<sub>3</sub>)

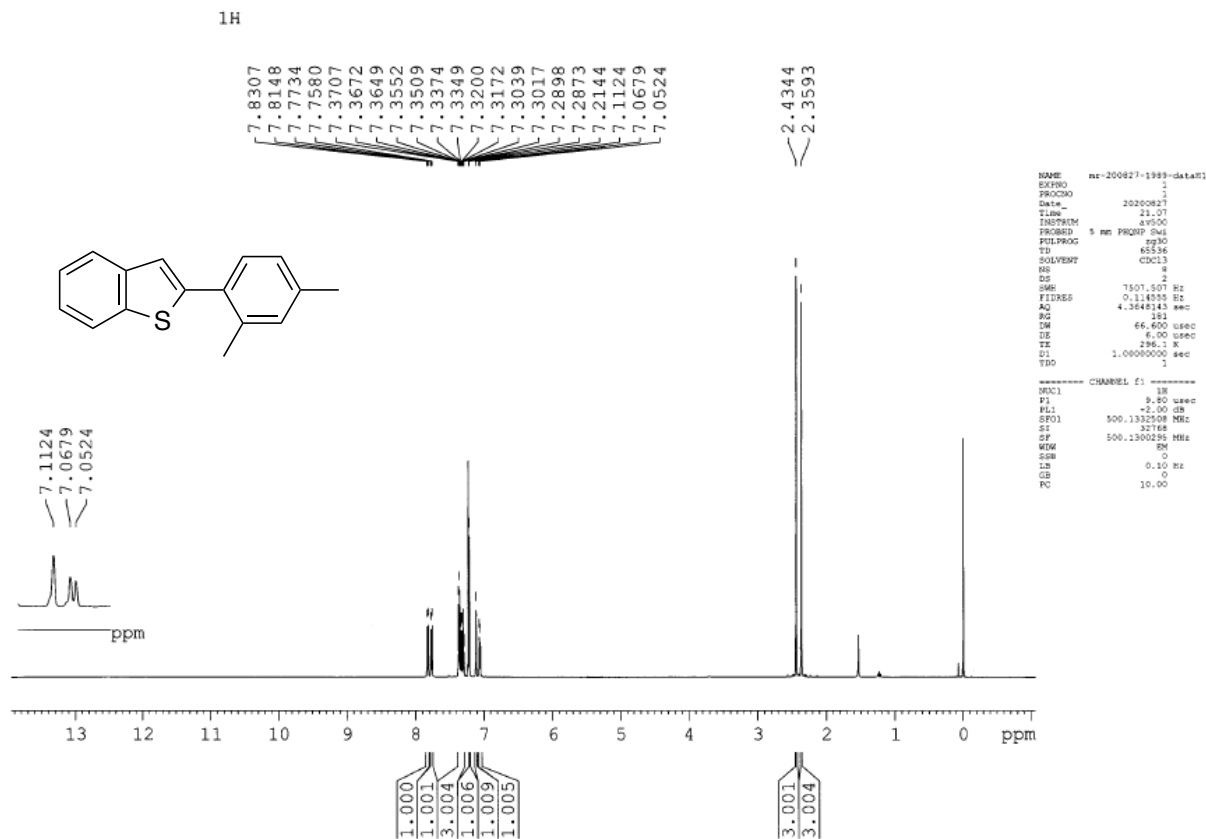

<sup>13</sup>C NMR (126 MHz, CDCl<sub>3</sub>)

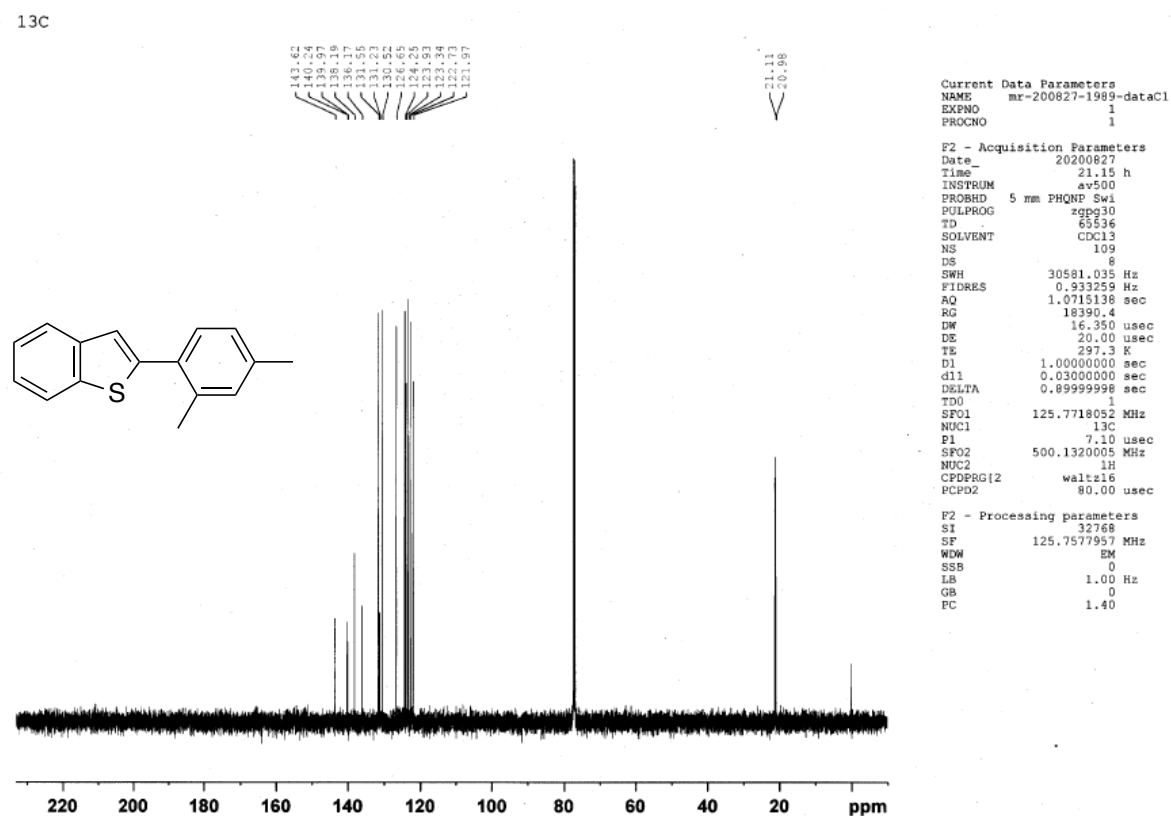

# 4-(Benzofuran-2-yl)benzene-1,2-diol (3ag, DHBF)

<sup>1</sup>H NMR (500 MHz, CDCl<sub>3</sub>)

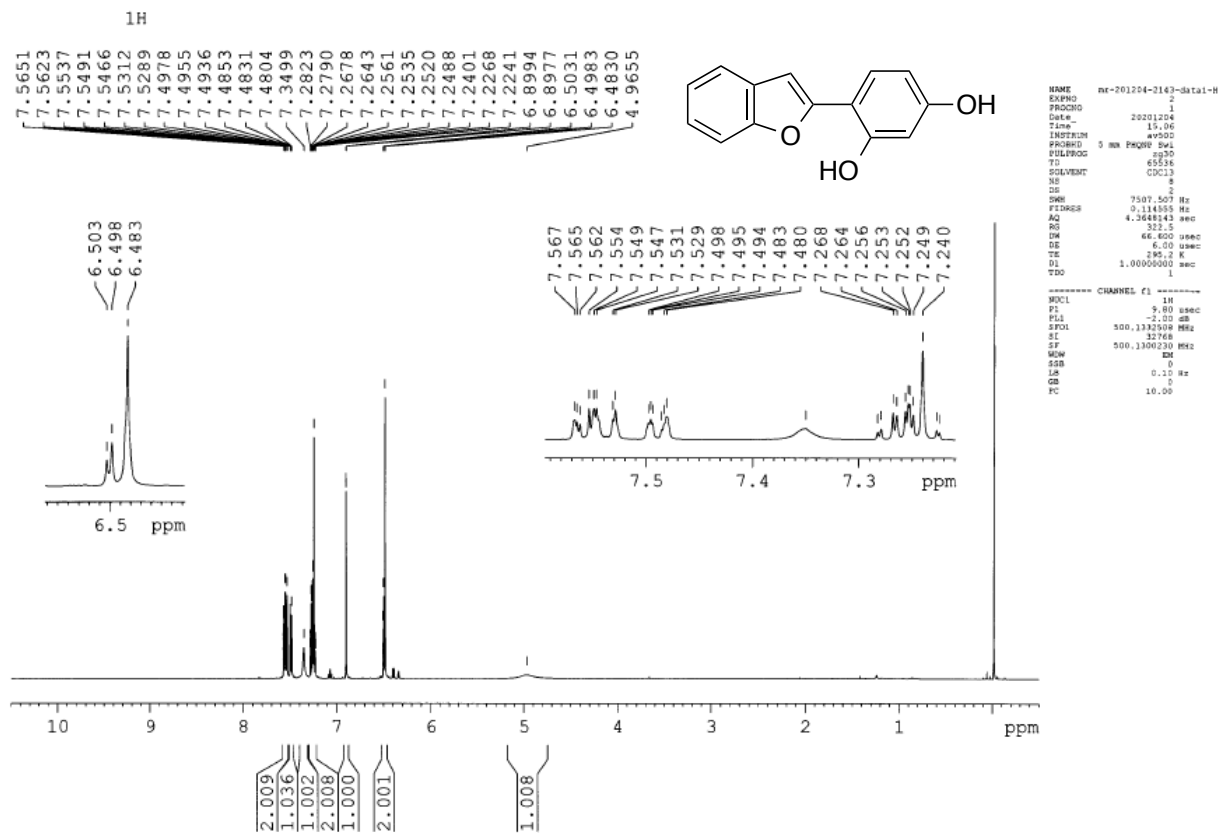

<sup>13</sup>C NMR (126 MHz, CDCl<sub>3</sub>)

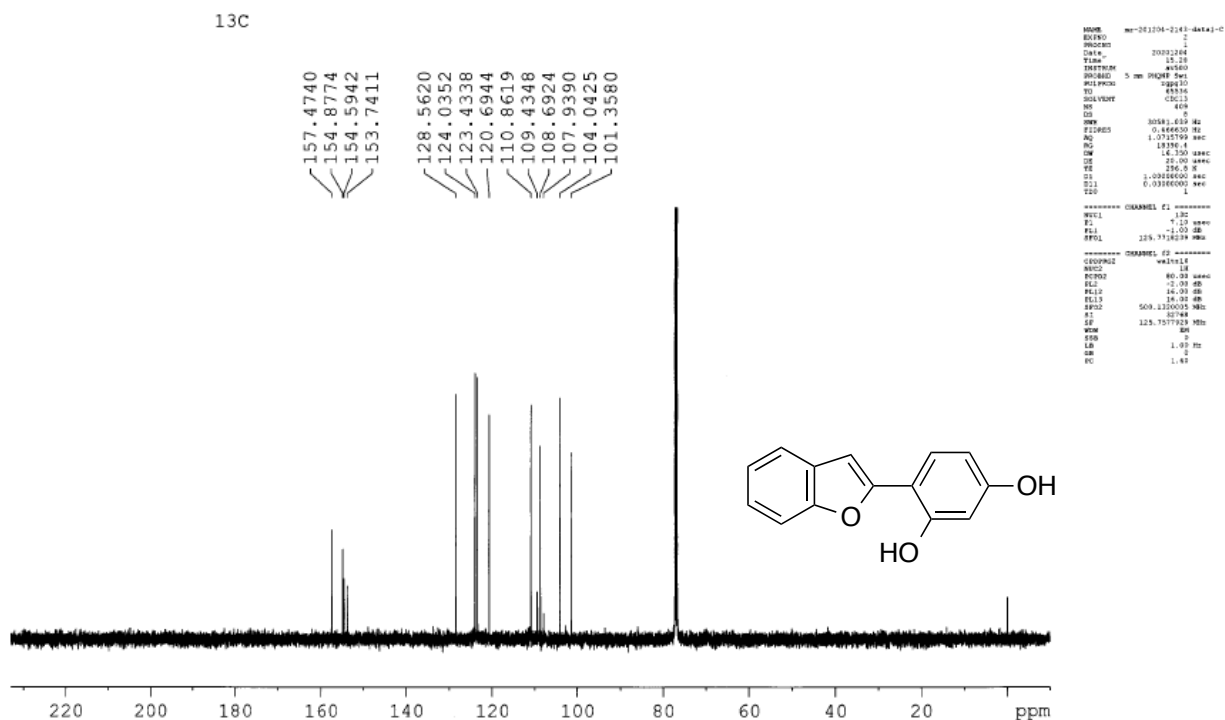

# 4-(7-Chlorobenzofuran-2-yl)phenol (3nd)

<sup>1</sup>H NMR (500 MHz, CDCl<sub>3</sub>)

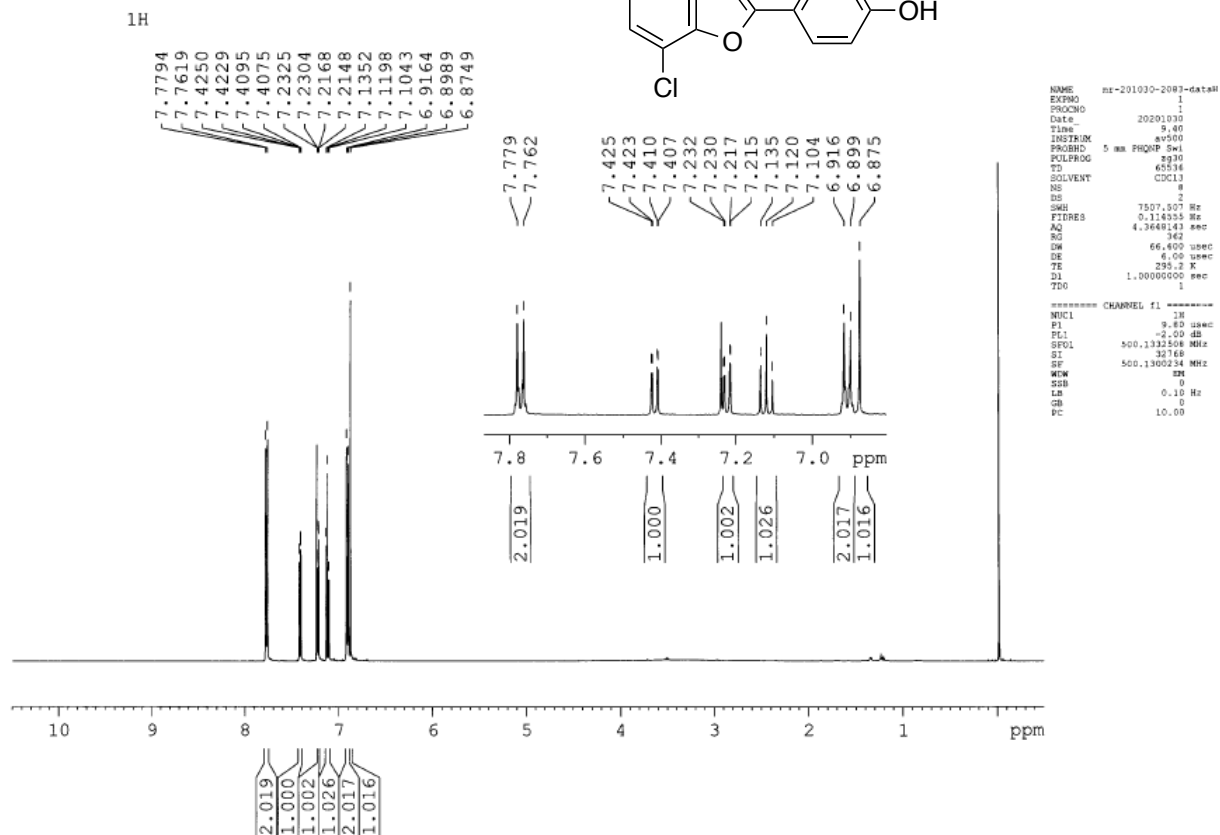

<sup>13</sup>C NMR (126 MHz, CDCl<sub>3</sub>)

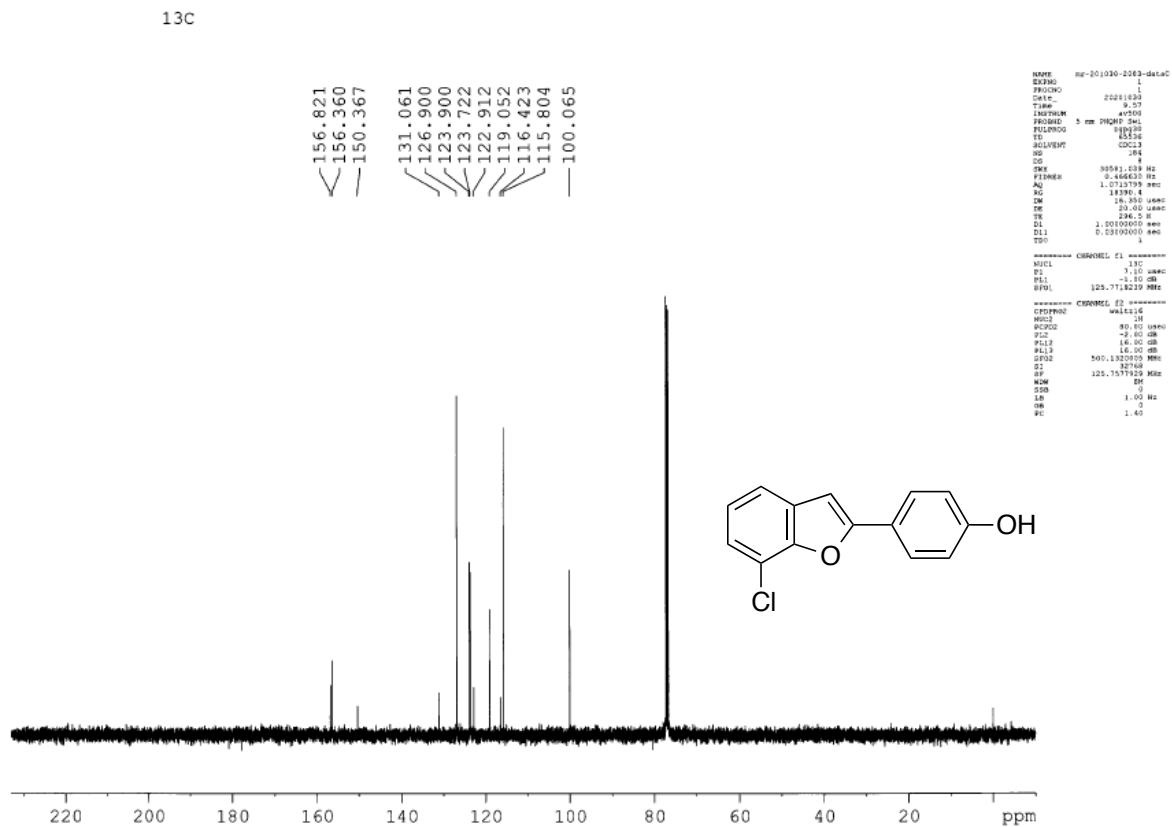

# 5-Bromo-2-fluoro-3-methylbenzofuran (1o)

<sup>1</sup>H NMR (500 MHz, CDCl<sub>3</sub>)

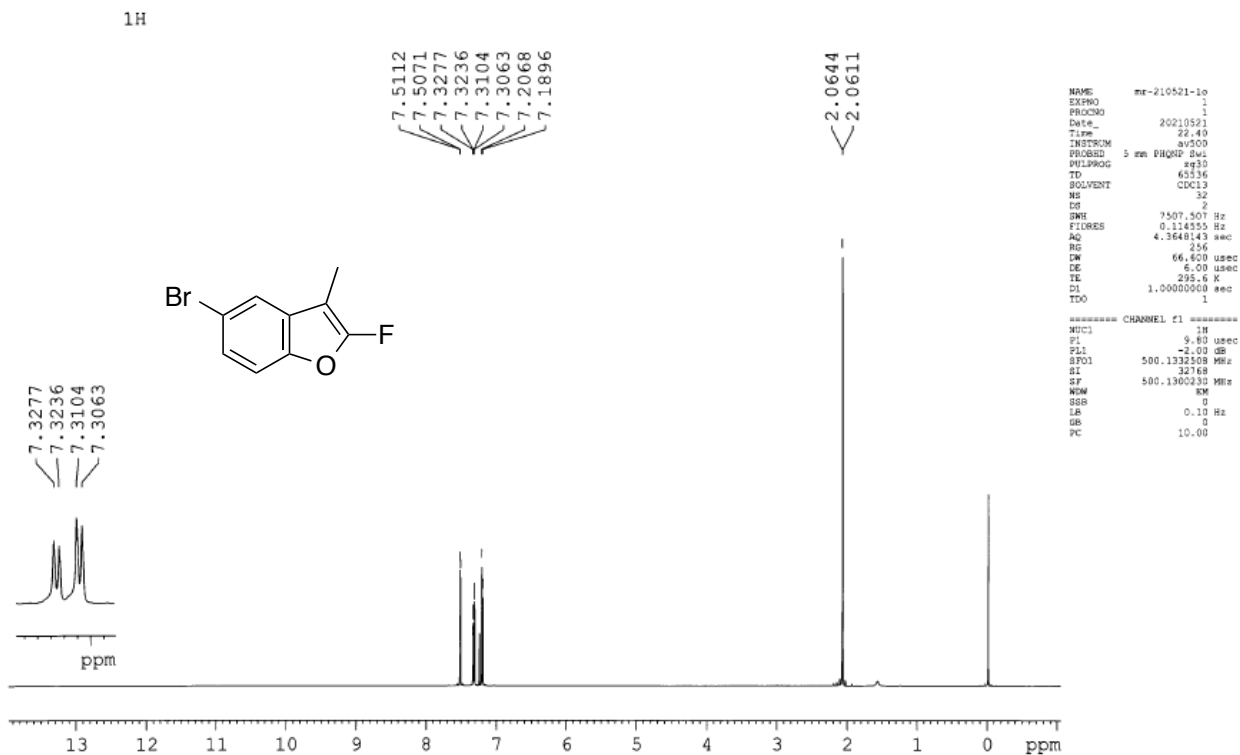

<sup>13</sup>C NMR (126 MHz, CDCl<sub>3</sub>)

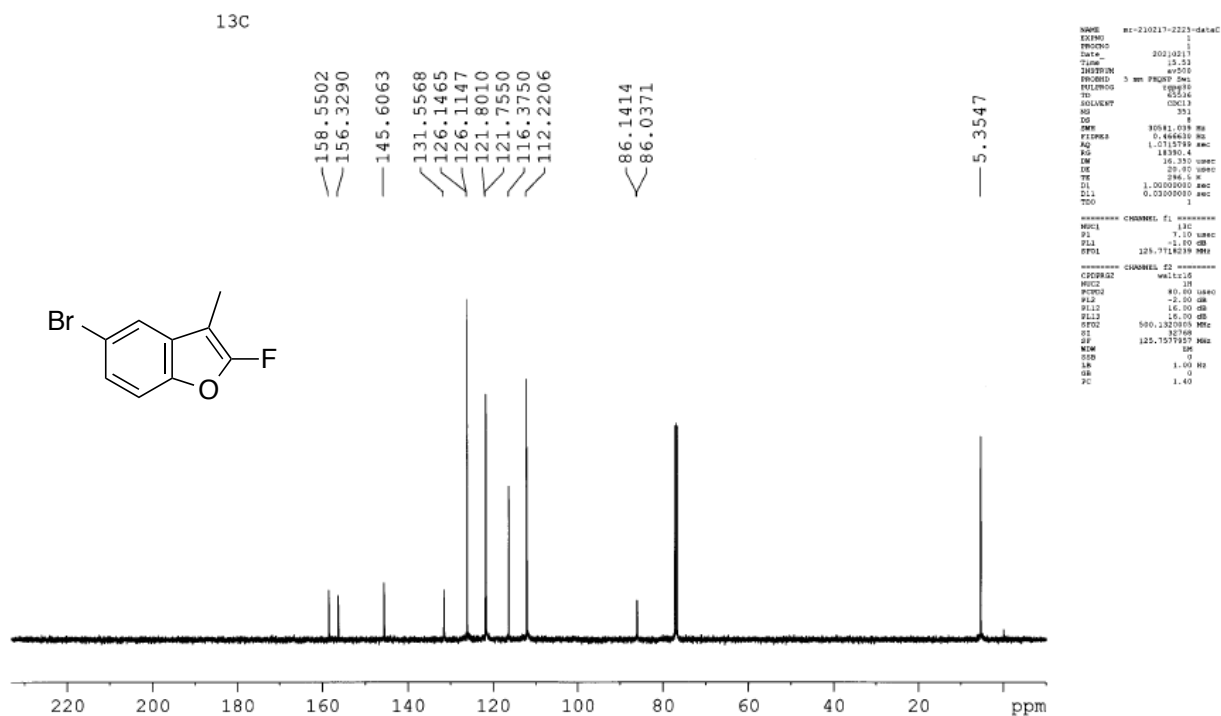

<sup>19</sup>F NMR (470 MHz, CDCl<sub>3</sub>)

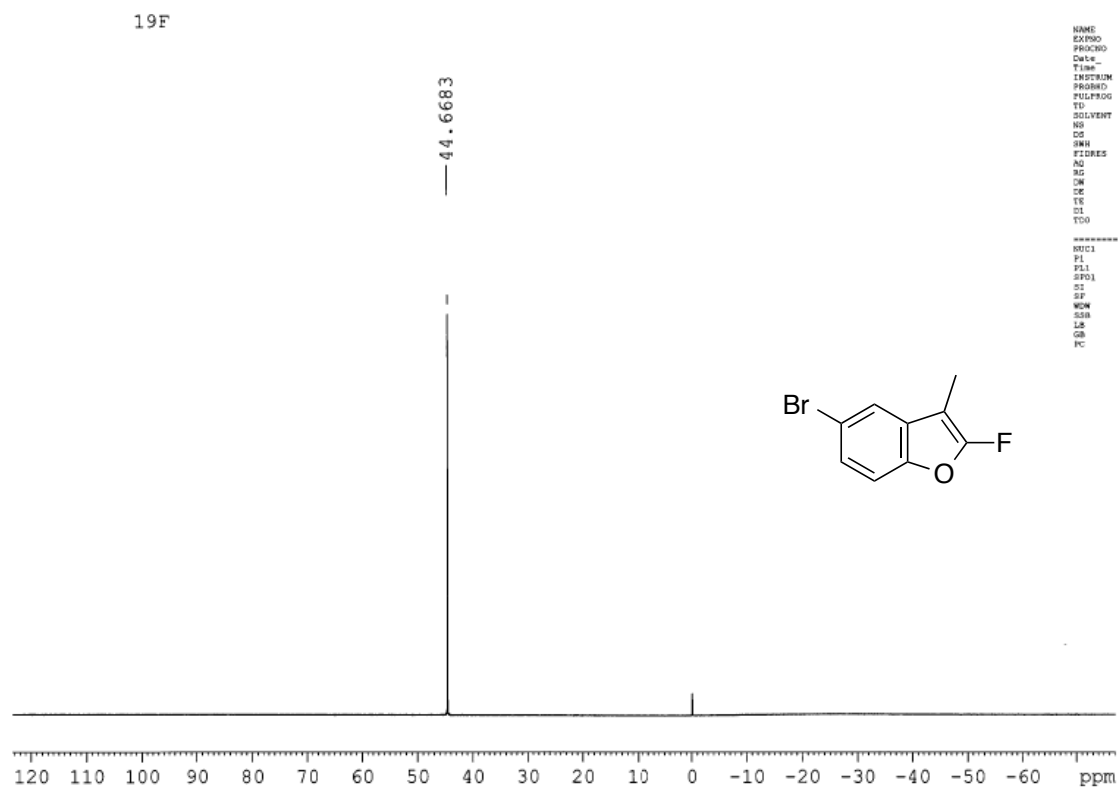

```
NAME      nr-210217-2221-dataF
EXPNO     1
PROCNO    1
Date_     20210217
Time      16:53
INSTRUM   avn500
PROBHD    5 mm PUNE SW1
PULPROG   zgpg30
TD         200000
SOLVENT   CDCl3
NS         8
DS         4
SWH        94339.625 Hz
FIDRES     0.471698 Hz
AQ         1.8600553 sec
RG         1296.7
DM         5.300 UseC
DE         0.00 UseC
TE         295.3 K
D1         10.00000000 sec
TDO        1
===== CHANNEL f1 =====
NUC1       19F
P1         4.60 UseC
PL1        -1.00 dB
SFO1       470.5247040 MHz
SI         131072
SF         470.5158070 MHz
WDW        EM
SSB        0
LB         1.00 Hz
GB         0
PC         3.00
```

# 4-(5-Bromo-3-methylbenzofuran-2-yl)phenol (3od)

<sup>1</sup>H NMR (500 MHz, CDCl<sub>3</sub>)

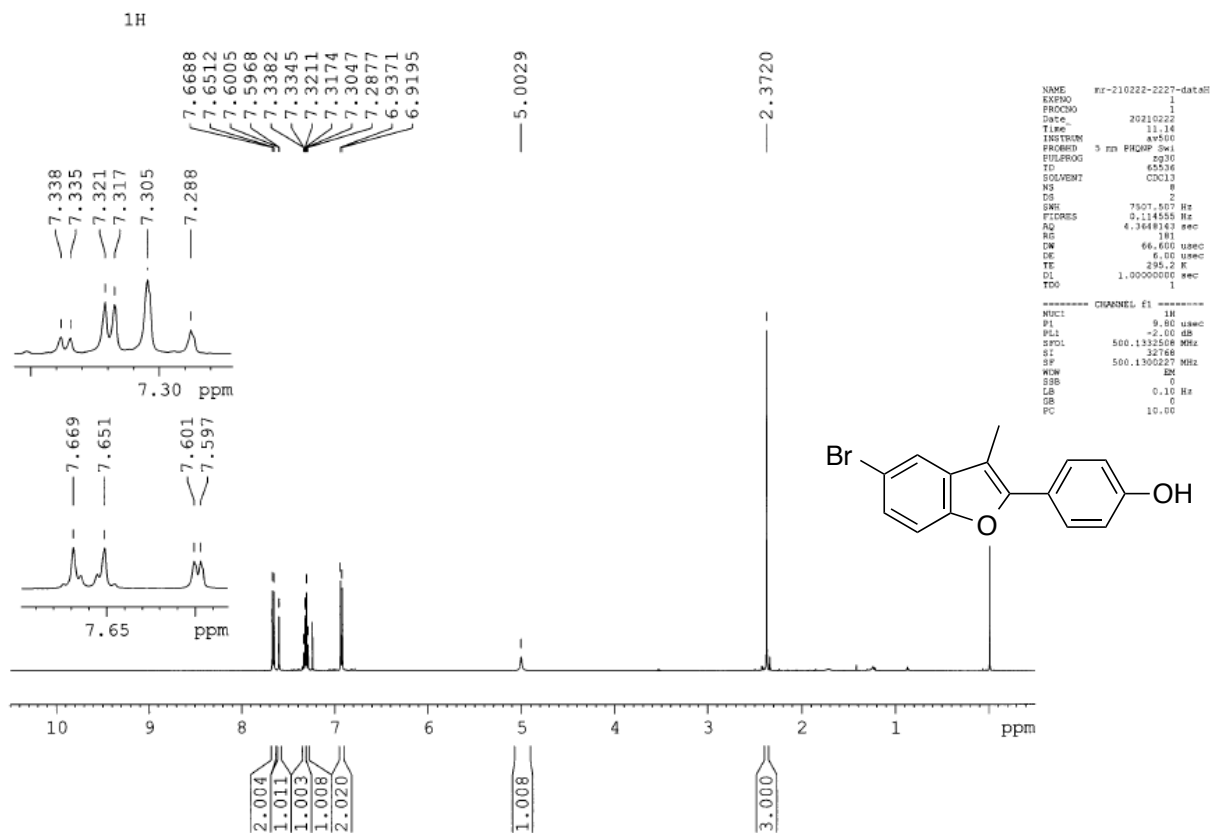

<sup>13</sup>C NMR (126 MHz, CDCl<sub>3</sub>)

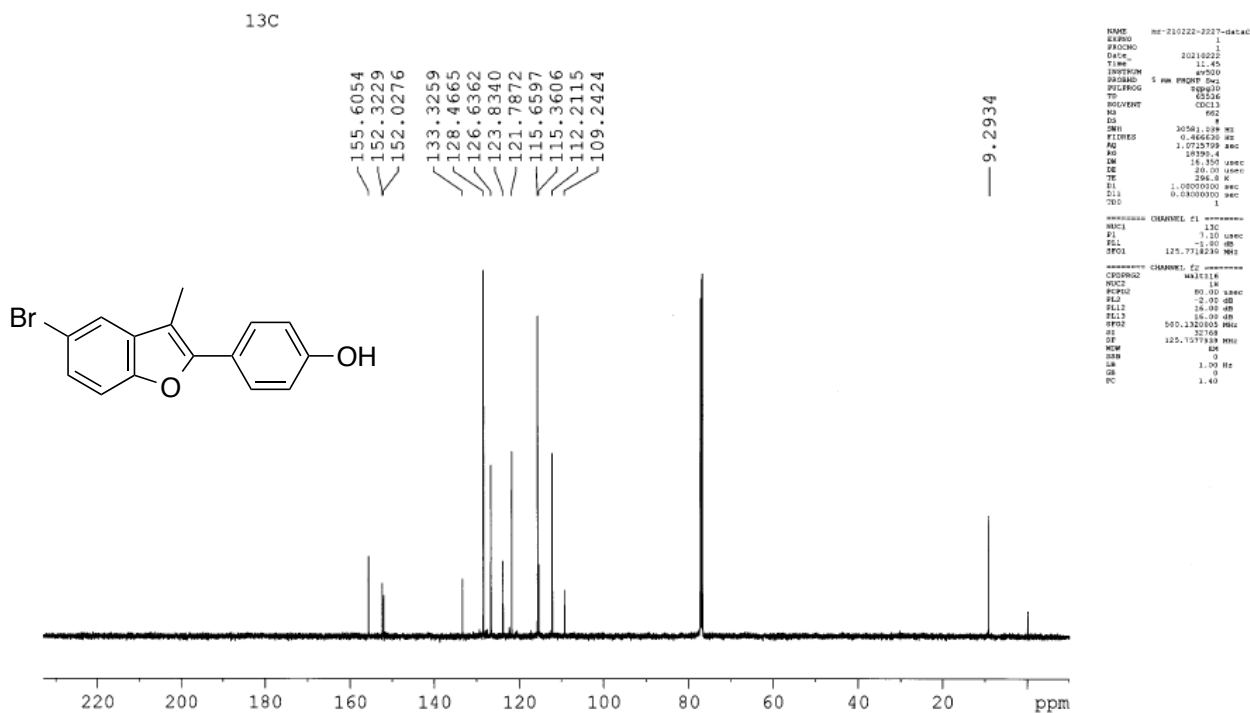

# Eupomatenoid 6 (4)

<sup>1</sup>H NMR (500 MHz, CDCl<sub>3</sub>)

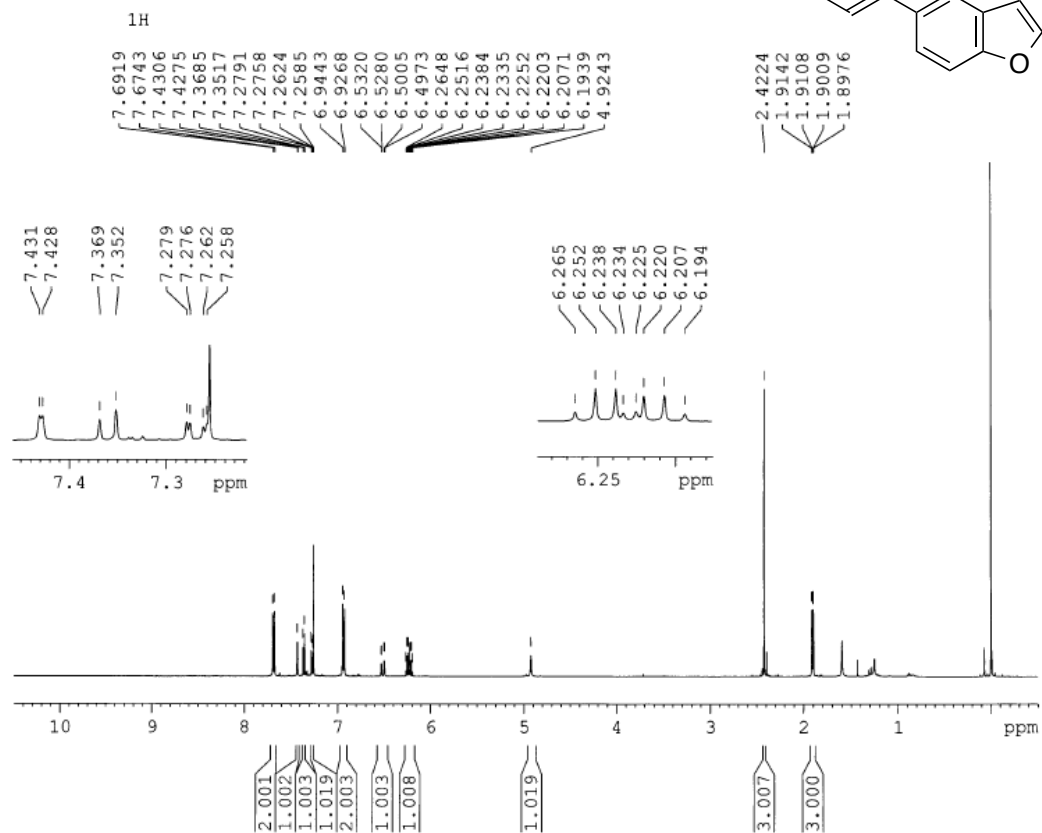

```

NAME      nc-210302-2234-H
EXPNO     1
PROCNO    1
Date_     20210302
Time      12.02
INSTRUM   av500
PROBHD    5 mm BBO-1H
PULPROG   zg30
TD         65536
SOLVENT   CDCl3
MS         2
DS         2
SB         7507.507 Hz
FIDRES    0.114555 Hz
AQ         4.3648143 sec
RG         322.5
RW         66.600 usec
SE         6.00 usec
TE         295.1 K
DQ         1.0000000 sec
TD         1
----- CHANNEL f1 -----
NUC1       1H
P1         9.80 usec
PC1        0.00 dB
SFO1       500.132508 MHz
SI         32768
SF         500.1300153 MHz
WDW        EM
SSB        0
LB         0.10 Hz
GB         0
PC         10.00
    
```

<sup>13</sup>C NMR (126 MHz, CDCl<sub>3</sub>)

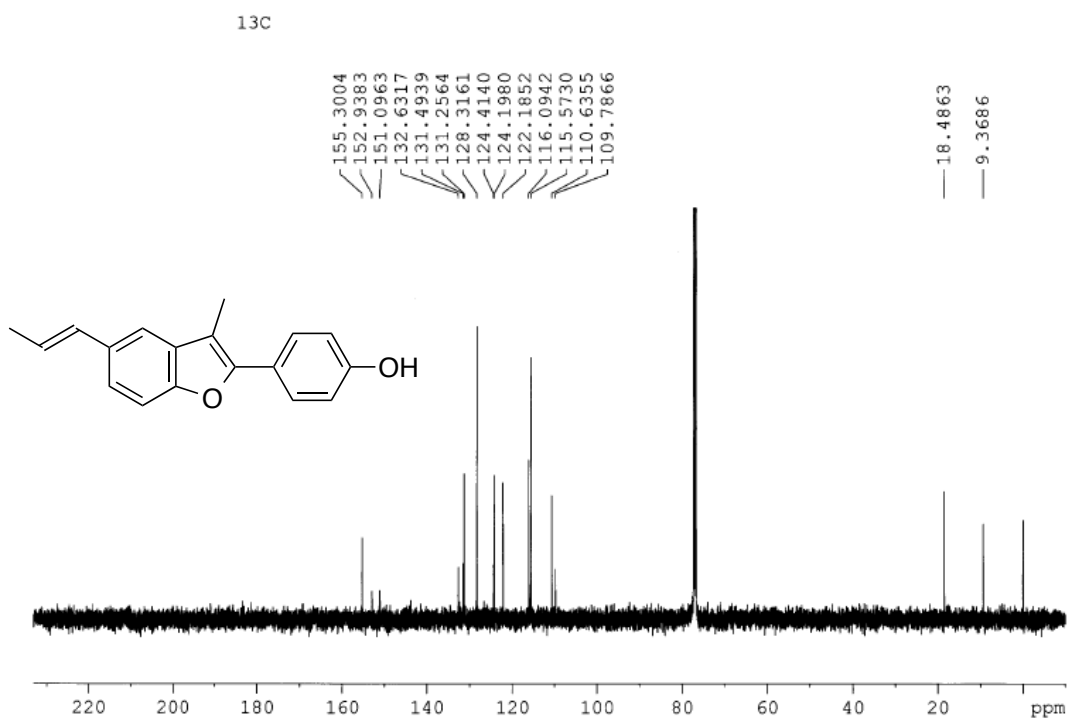

```

NAME      nc-210302-2236-C
EXPNO     1
PROCNO    1
Date_     20210302
Time      12.33
INSTRUM   av500
PROBHD    5 mm BBO-1H
PULPROG   zgpg30
TD         65536
SOLVENT   CDCl3
MS         2
DS         2
SB         31581.025 Hz
FIDRES    1.0715199 Hz
AQ         4.0290141 sec
RG         322.5
RW         18.350 usec
SE         25.00 usec
TE         294.0 K
DQ         1.0000000 sec
TD         0.13000000 sec
----- CHANNEL f1 -----
NUC1       13C
P1         7.10 usec
PC1        -1.00 dB
SFO1       125.7616239 MHz
----- CHANNEL f2 -----
CPDPRG2   waltz16
NUC2       1H
PCPD2     80.00 usec
PC2        -2.00 dB
PFL2      15.00 dB
FL13      15.00 dB
SFO2       500.1300001 MHz
SI         32768
SF         125.7617919 MHz
WDW        EM
SSB        0
LB         1.00 Hz
GB         0
PC         1.40
    
```
